# Supplementary material for: Co-designing a dashboard of predictive analytics and decision support to drive care quality and client outcomes in aged care: a mixed-method study protocol
Source: PubMed Central journal article supplement — BMJ Open. 2021 Aug 25;11(8):e048657. doi: 10.1136/bmjopen-2021-048657 (PMC8388274; doi:10.1136/bmjopen-2021-048657), 2021-08-25

# BMJ Open

BMJ Open is committed to open peer review. As part of this commitment we make the peer review history of every article we publish publicly available.

When an article is published we post the peer reviewers' comments and the authors' responses online. We also post the versions of the paper that were used during peer review. These are the versions that the peer review comments apply to.

The versions of the paper that follow are the versions that were submitted during the peer review process. They are not the versions of record or the final published versions. They should not be cited or distributed as the published version of this manuscript.

BMJ Open is an open access journal and the full, final, typeset and author-corrected version of record of the manuscript is available on our site with no access controls, subscription charges or pay-per-view fees (<http://bmjopen.bmj.com>).

If you have any questions on BMJ Open's open peer review process please email [info.bmjopen@bmj.com](mailto:info.bmjopen@bmj.com)

# BMJ Open

## A dashboard of predictive analytics and decision support to drive care quality and client outcomes in aged care: A mixed-methods study protocol

|                               |                                                                                                                                                                                                                                                                                                                                                                                                                                                                                                                                                                                                                                                                                                                                                                                                                                                                                                                                                                                                                                                                                                                                                                                                                                                                                                                                                                                                                                                                                                                                                                                                                                                                                                                                                                                                                                                                                                                                                                                                                                                                                                                                                                                                                                                                                                                                                                    |
|-------------------------------|--------------------------------------------------------------------------------------------------------------------------------------------------------------------------------------------------------------------------------------------------------------------------------------------------------------------------------------------------------------------------------------------------------------------------------------------------------------------------------------------------------------------------------------------------------------------------------------------------------------------------------------------------------------------------------------------------------------------------------------------------------------------------------------------------------------------------------------------------------------------------------------------------------------------------------------------------------------------------------------------------------------------------------------------------------------------------------------------------------------------------------------------------------------------------------------------------------------------------------------------------------------------------------------------------------------------------------------------------------------------------------------------------------------------------------------------------------------------------------------------------------------------------------------------------------------------------------------------------------------------------------------------------------------------------------------------------------------------------------------------------------------------------------------------------------------------------------------------------------------------------------------------------------------------------------------------------------------------------------------------------------------------------------------------------------------------------------------------------------------------------------------------------------------------------------------------------------------------------------------------------------------------------------------------------------------------------------------------------------------------|
| Journal:                      | <i>BMJ Open</i>                                                                                                                                                                                                                                                                                                                                                                                                                                                                                                                                                                                                                                                                                                                                                                                                                                                                                                                                                                                                                                                                                                                                                                                                                                                                                                                                                                                                                                                                                                                                                                                                                                                                                                                                                                                                                                                                                                                                                                                                                                                                                                                                                                                                                                                                                                                                                    |
| Manuscript ID                 | bmjopen-2021-048657                                                                                                                                                                                                                                                                                                                                                                                                                                                                                                                                                                                                                                                                                                                                                                                                                                                                                                                                                                                                                                                                                                                                                                                                                                                                                                                                                                                                                                                                                                                                                                                                                                                                                                                                                                                                                                                                                                                                                                                                                                                                                                                                                                                                                                                                                                                                                |
| Article Type:                 | Protocol                                                                                                                                                                                                                                                                                                                                                                                                                                                                                                                                                                                                                                                                                                                                                                                                                                                                                                                                                                                                                                                                                                                                                                                                                                                                                                                                                                                                                                                                                                                                                                                                                                                                                                                                                                                                                                                                                                                                                                                                                                                                                                                                                                                                                                                                                                                                                           |
| Date Submitted by the Author: | 04-Jan-2021                                                                                                                                                                                                                                                                                                                                                                                                                                                                                                                                                                                                                                                                                                                                                                                                                                                                                                                                                                                                                                                                                                                                                                                                                                                                                                                                                                                                                                                                                                                                                                                                                                                                                                                                                                                                                                                                                                                                                                                                                                                                                                                                                                                                                                                                                                                                                        |
| Complete List of Authors:     | <p>Ludlow, Kristiana; Macquarie University, Centre for Health Systems and Safety Research, Australian Institute of Health Innovation<br/> Westbrook, Johanna; Macquarie University, Centre for Health Systems and Safety Research, Australian Institute of Health Innovation,<br/> Jorgensen, Mikaela; Macquarie University, Centre for Health Systems and Safety Research, Australian Institute of Health Innovation<br/> Lind, Kimberly ; The University of Arizona, Department of Health Promotion Sciences, Mel &amp; Enid Zuckerman College of Public Health<br/> Baysari, Melissa; The University of Sydney Faculty of Medicine and Health, Discipline of Biomedical Informatics and Digital Health, Charles Perkins Centre<br/> Gray, Len; The University of Queensland, Centre for Research in Geriatric Medicine<br/> Day, Richard; University of New South Wales, St Vincent's Clinical School<br/> Ratcliffe, Julie; Flinders University of South Australia, College of Nursing and Health Sciences;<br/> Lord, Stephen; Neuroscience Research Australia; University of New South Wales, School of Public health and Community Medicine<br/> Georgiou, A; Macquarie University, Centre for Health Systems and Safety Research, Australian Institute of Health Innovation<br/> Braithwaite, Jeffrey; Macquarie University, Centre for Healthcare Resilience and Implementation Science, Australian Institute of Health Innovation; ISQua<br/> Raban, Magdalena; Macquarie University, Centre for Health Systems and Safety Research, Australian Institute of Health Innovation<br/> Close, Jacqueline; Neuroscience Research Australia<br/> Beattie, Elizabeth; Queensland University of Technology, School of Nursing<br/> Zheng, Wu Yi; Black Dog Institute<br/> Debono, Deborah; University of Technology Sydney, School of Public Health, Faculty of Health<br/> Nguyen, A; Macquarie University, Centre for Health Systems and Safety Research, Australian Institute of Health Innovation<br/> Siette, Joyce; Macquarie University, Centre for Health Systems and Safety Research, Australian Institute of Health Innovation<br/> Seaman, Karla ; Macquarie University, Centre for Health Systems and Safety Research, Australian Institute of Health Innovation<br/> Miao, Melissa; University of Technology Sydney, Graduate School of Health</p> |

1  
2  
3  
4  
5  
6  
7  
8  
9  
10  
11  
12  
13  
14  
15  
16  
17  
18  
19  
20  
21  
22  
23  
24  
25  
26  
27  
28  
29  
30  
31  
32  
33  
34  
35  
36  
37  
38  
39  
40  
41  
42  
43  
44  
45  
46  
47  
48  
49  
50  
51  
52  
53  
54  
55  
56  
57  
58  
59  
60

|                  |                                                                                                                                                                                                                                                                                                                                                                                                                                                                                         |
|------------------|-----------------------------------------------------------------------------------------------------------------------------------------------------------------------------------------------------------------------------------------------------------------------------------------------------------------------------------------------------------------------------------------------------------------------------------------------------------------------------------------|
|                  | <p>Root, Jo; Consumers Health Forum of Australia<br/> Roffe, David; IT Consultant<br/> O'Toole, Libby; Aged Care Quality and Safety Commission<br/> Carrasco, Marcela; Anglicare Sydney<br/> Thompson, Alex; Anglicare Sydney<br/> Shaikh, Javed; Anglicare Sydney<br/> Wong, Jeffrey; Anglicare Sydney<br/> Stanton, Cynthia; Sydney North Health Network<br/> Haddock, Rebecca; Australian Healthcare and Hospitals Association,<br/> Deeble Institute for Health Policy Research</p> |
| <p>Keywords:</p> | <p>Health informatics &lt; BIOTECHNOLOGY &amp; BIOINFORMATICS, Information technology &lt; BIOTECHNOLOGY &amp; BIOINFORMATICS, Health &amp; safety &lt; HEALTH SERVICES ADMINISTRATION &amp; MANAGEMENT, Quality in health care &lt; HEALTH SERVICES ADMINISTRATION &amp; MANAGEMENT, Risk management &lt; HEALTH SERVICES ADMINISTRATION &amp; MANAGEMENT, GERIATRIC MEDICINE</p>                                                                                                      |
|                  |                                                                                                                                                                                                                                                                                                                                                                                                                                                                                         |

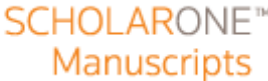

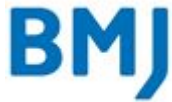

I, the Submitting Author has the right to grant and does grant on behalf of all authors of the Work (as defined in the below author licence), an exclusive licence and/or a non-exclusive licence for contributions from authors who are: i) UK Crown employees; ii) where BMJ has agreed a CC-BY licence shall apply, and/or iii) in accordance with the terms applicable for US Federal Government officers or employees acting as part of their official duties; on a worldwide, perpetual, irrevocable, royalty-free basis to BMJ Publishing Group Ltd ("BMJ") its licensees and where the relevant Journal is co-owned by BMJ to the co-owners of the Journal, to publish the Work in this journal and any other BMJ products and to exploit all rights, as set out in our [licence](#).

The Submitting Author accepts and understands that any supply made under these terms is made by BMJ to the Submitting Author unless you are acting as an employee on behalf of your employer or a postgraduate student of an affiliated institution which is paying any applicable article publishing charge ("APC") for Open Access articles. Where the Submitting Author wishes to make the Work available on an Open Access basis (and intends to pay the relevant APC), the terms of reuse of such Open Access shall be governed by a Creative Commons licence – details of these licences and which [Creative Commons](#) licence will apply to this Work are set out in our licence referred to above.

Other than as permitted in any relevant BMJ Author's Self Archiving Policies, I confirm this Work has not been accepted for publication elsewhere, is not being considered for publication elsewhere and does not duplicate material already published. I confirm all authors consent to publication of this Work and authorise the granting of this licence.

1  
2  
3 **A dashboard of predictive analytics and decision support to drive care quality and**  
4  
5 **client outcomes in aged care: A mixed-methods study protocol**  
6  
7  
8  
9

10 Kristiana Ludlow\*<sup>1</sup>, Johanna Westbrook<sup>1</sup>, Mikaela Jorgensen<sup>1</sup>, Kimberly E. Lind<sup>2</sup>, Melissa  
11 Baysari<sup>3</sup>, Leonard C. Gray<sup>4</sup>, Richard Day<sup>5</sup>, Julie Ratcliffe<sup>6</sup>, Stephen R. Lord<sup>7,8</sup>, Andrew  
12 Georgiou<sup>1</sup>, Jeffrey Braithwaite<sup>9,10</sup>, Magdalena Z. Raban<sup>1</sup>, Jacqueline Close<sup>7</sup>, Elizabeth  
13 Beattie<sup>11</sup>, Wu Yi Zheng<sup>12</sup>, Deborah Debono<sup>13</sup>, Amy D. Nguyen<sup>1</sup>, Joyce Siette<sup>1</sup>, Karla  
14 Seaman<sup>1</sup>, Melissa Miao<sup>14</sup>, Jo Root<sup>15</sup>, David Roffe<sup>16</sup>, Libby O'Toole<sup>17</sup>, Marcela Carrasco<sup>18</sup>,  
15 Alex Thompson<sup>18</sup>, Javed Shaikh<sup>18</sup>, Jeffrey Wong<sup>18</sup>, Cynthia Stanton<sup>19</sup>, Rebecca Haddock<sup>20</sup>  
16  
17  
18  
19  
20  
21  
22  
23  
24  
25  
26  
27

28 <sup>1</sup> Centre for Health Systems and Safety Research, Australian Institute of Health Innovation,  
29 Macquarie University, Sydney, Australia  
30  
31

32 <sup>2</sup> Department of Health Promotion Sciences, Mel & Enid Zuckerman College of Public  
33 Health, The University of Arizona, Tucson, AZ, United States of America  
34  
35  
36

37 <sup>3</sup> Discipline of Biomedical Informatics and Digital Health, Charles Perkins Centre, Faculty of  
38 Medicine and Health, The University of Sydney  
39  
40  
41

42 <sup>4</sup> Centre for Health Services Research, University of Queensland, Brisbane, Australia  
43  
44

45 <sup>5</sup> St Vincent's Clinical School, University of New South Wales, Sydney, Australia  
46  
47

48 <sup>6</sup> College of Nursing and Health Sciences, Flinders University, Adelaide, Australia  
49  
50

51 <sup>7</sup> Neuroscience Research Australia, Sydney, Australia  
52

53 <sup>8</sup> School of Public health and Community Medicine, University of New South Wales,  
54 Sydney, Australia  
55  
56

57 <sup>9</sup> Centre for Healthcare Resilience and Implementation Science, Australian Institute of Health  
58 Innovation, Macquarie University, Sydney, Australia  
59  
60

1  
2  
3 <sup>10</sup> The International Society for Quality in Health Care, Dublin, Ireland  
4

5  
6 <sup>11</sup> School of Nursing, Queensland University of Technology, Brisbane, Australia  
7

8 <sup>12</sup> Black Dog Institute, Sydney, Australia  
9

10  
11 <sup>13</sup> School of Public Health, Faculty of Health, University of Technology Sydney, Sydney,  
12  
13 Australia  
14

15  
16 <sup>14</sup> Graduate School of Health, University of Technology Sydney, Sydney, Australia  
17

18  
19 <sup>15</sup> Consumers Health Forum of Australia, Deakin, Australia  
20

21 <sup>16</sup> IT consultant  
22

23  
24 <sup>17</sup> Aged Care Quality and Safety Commission, Sydney, Australia  
25

26 <sup>18</sup> Anglicare, Sydney, Australia  
27

28  
29 <sup>19</sup> Sydney North Health Network, Sydney, Australia  
30

31  
32 <sup>20</sup> Deeble Institute for Health Policy Research, Australian Healthcare and Hospitals  
33  
34 Association, Canberra, Australia  
35

36  
37  
38  
39 \* Corresponding author details:  
40

41  
42 Address: Level 6, 75 Talavera Road, Macquarie University, NSW 2109, Australia; email:  
43

44 [kristiana.ludlow@mq.edu.au](mailto:kristiana.ludlow@mq.edu.au)  
45  
46  
47  
48

49 **KEYWORDS**  
50

51  
52 Health informatics; Information technology; Health & Safety; Quality in Health care; Risk  
53  
54 Management; Geriatric Medicine  
55

56  
57  
58  
59 Word count: 3,724  
60

## ABSTRACT

### Introduction

There is a clear need for improved care quality and quality monitoring in aged care. Aged care providers collect an abundance of data, yet rarely are these data integrated and transformed in real-time into actionable information to support the provision of evidence-based care, nor shared with older people and their informal caregivers. This protocol describes the design and testing of a dashboard, for both residential and community-based aged care settings, comprising integrated information to provide an 'at-a-glance' overview of individuals receiving care, indicators to identify clients at risk of fall-related hospitalisations and poor quality of life, and evidence-based decision support to minimise these risks. Longer-term plans for dashboard implementation and evaluation are also outlined.

### Methods

This mixed-methods study will involve (i) co-designing dashboard features with users including aged care staff, clients, informal caregivers and general practitioners (GPs), (ii) integrating aged care data silos and developing risk models, and (iii) testing a dashboard prototype with users. The dashboard features will be informed by direct observations of routine work, interviews and focus groups with users, and a community forum. Multivariable discrete time survival models will be used to develop risk indicators, using predictors from linked historical aged care and hospital data. Dashboard prototype testing will comprise interviews, focus groups and walk-through scenarios using a think-aloud approach with staff members, clients and informal caregivers, and a GP workshop.

### Ethics and dissemination

This study has received ethical approval from the NSW Population & Health Services Research Ethics Committee and [University name blinded for peer-review] The findings of

1  
2  
3 this research project will be presented to the aged care provider who will share results with  
4 staff members, clients and their informal caregivers. Findings will also be disseminated as  
5 peer-reviewed journal articles, policy briefs, conference presentations, and discussions with  
6 policymakers and advocacy networks.  
7  
8  
9  
10  
11  
12  
13  
14

## 15 **STRENGTHS AND LIMITATIONS OF THIS STUDY**

- 16  
17  
18 • The linkage of multiple data sources will allow for comprehensive information about aged  
19 care clients' health conditions, psychosocial characteristics, care management,  
20 hospitalisations, and quality of life.  
21  
22
- 23  
24  
25 • The dashboard's use of existing routinely collected data will enable the prediction of risk,  
26 and provide evidence-based guidance, in real-time.  
27  
28
- 29  
30  
31 • To ensure that the dashboard is fit-for-purpose, intended users (staff, aged care clients,  
32 informal caregivers, general practitioners) will be involved in the co-design and testing of  
33 the dashboard.  
34  
35
- 36  
37  
38 • The dashboard will be designed to have generic characteristics which will allow it to be  
39 embedded into existing aged care information technology to facilitate its transferability  
40 and sustainability.  
41  
42
- 43  
44  
45 • Most aged care services in this study will be located in major cities, therefore, findings will  
46 be limited in regional and remote areas, where client profiles and staff workflows could be  
47 different.  
48  
49  
50  
51  
52  
53  
54  
55  
56  
57  
58  
59  
60



## INTRODUCTION

Good quality care relies upon the availability of good quality data and real-time analytics to support decision-making. This is particularly the case for older people with complex health needs who are supported by a wide-range of people in different settings. Aged care services have not been well served by information systems that support everyday care provision. Internationally, there is consistent evidence that aged care systems are struggling to provide high quality services for older adults, with shortcomings highlighted by many recent reviews, reports and research.<sup>1-5</sup> The delivery of optimal care is hindered by a lack of integration between aged care and other healthcare services, fragmented funding systems, inadequate infrastructure, insufficient workforce training and support, and a widening gap between supply and demand of services.<sup>6</sup>

In Australia, concerns about suboptimal care and escalating pressure on aged care services has led to more than 40 major inquiries and reviews over the past 40 years,<sup>7</sup> the latest being the Royal Commission into Aged Care Quality and Safety (2018-20). The purpose of the Royal Commission is to examine the current state of the aged care system and determine what is needed to improve it for those receiving care now and into the future.<sup>1 8</sup> Interim findings have made it clear that the community is demanding better quality aged care and greater transparency: a system that meets older peoples' needs, identifies when they are at risk, and responds in effective and compassionate ways.<sup>1 9</sup>

Despite enormous amounts of data collected in the sector, there continues to be considerable problems for informal caregivers, providers, and governments to obtain meaningful information to allow the monitoring of care delivery and outcomes, and to guide effective decision-making.<sup>1</sup> The increasing use of electronic systems provides an opportunity to address some of these shortcomings. The World Health Organization's World Report on Ageing and Health identified information and communication technologies (ICT) as a

1  
2  
3 “critical tool for transforming health systems and services to deliver person-centred and  
4 integrated care that is appropriate to older people”.<sup>6(p. 109)</sup> The report outlines some of the  
5 anticipated and demonstrated benefits of utilising ICT in terms of access to services, quality  
6 and safety of care, cost effectiveness of services, accessibility of information and knowledge,  
7 social care and connectedness, and the provision of evidence-based care.<sup>6</sup>  
8  
9  
10  
11  
12  
13  
14  
15  
16  
17

### 18 **Data rich but information poor**

19  
20 While the last decade has seen substantial uptake of ICT by aged care sectors  
21 internationally,<sup>10</sup> the potential of these systems to transform care quality by increasing the  
22 usability and transparency of aged care information remains largely unrealised.<sup>10</sup> Health and  
23 aged care systems are often characterised as ‘*data rich but information poor*’,<sup>11 12</sup> meaning  
24 that although providers collect vast amounts of clinical and care management data, these data  
25 frequently exist within silos that are rarely integrated to create meaningful information or  
26 knowledge to support care staff to coordinate, monitor and enhance care delivery. In  
27 Australia, these information silos are often driven by variations in funding and ownership of  
28 data (e.g., between aged care and healthcare, or between State and Federal governments).  
29 Furthermore, these data are not often shared with the people who are the subject of data  
30 collection (i.e., those receiving services and their informal caregivers) or with the general  
31 public who largely fund aged care services through tax contributions.  
32  
33  
34  
35  
36  
37  
38  
39  
40  
41  
42  
43  
44  
45  
46  
47

48 Data have traditionally been used for reporting purposes rather than quality  
49 improvement activities or driving care processes. Several countries have mandated systems  
50 for collecting and reporting aged care information,<sup>13</sup> for example, the Home Care Reporting  
51 System and Continuing Care Reporting System in Canada, the United States’ MDS 3.0 and  
52 Nursing Home Compare, Sweden’s Open Comparisons national quality monitoring system,  
53 and the International Resident Assessment Instrument Long-Term Care Facility (interRAI-  
54  
55  
56  
57  
58  
59  
60

1  
2  
3 LTCF) Assessment System in New Zealand. Australia's aged care system lags behind other  
4  
5 Organisation for Economic Co-operation and Development (OECD) countries in terms of  
6  
7 measuring and reporting on aged care quality.<sup>14</sup> For example, Australia's National Aged Care  
8  
9 Mandatory Quality Indicator Program,<sup>15</sup> operating since 2019, collects information on three  
10  
11 quality indicators (physical restraint use, pressure ulcers and weight loss) in residential aged  
12  
13 care settings (also known as assisted living facilities, nursing homes, long-term care facilities,  
14  
15 and skilled nursing facilities). The aggregated data that are publicly reported for this program  
16  
17 allow comparisons to be made between providers at this time. Additional quality indicators  
18  
19 for falls and major injury, and medication management are being introduced to the program  
20  
21 in 2021. Currently, there is no system for mandatory reporting of quality indicators in  
22  
23 community care settings (i.e., formal aged care services provided in the home and  
24  
25 community). Limited and disparate information on the quality of aged care in Australia  
26  
27 reduces the capacity for older adults and their caregivers to make informed decisions about  
28  
29 their care. Without this information, providers are limited in their ability to monitor and  
30  
31 benchmark key quality indicators across services, initiate improvement activities, and  
32  
33 systematically and iteratively assess the effectiveness and cost-effectiveness of services and  
34  
35 interventions.  
36  
37  
38  
39  
40  
41  
42  
43  
44

### 45 **Predictive risk models**

46  
47 Very little attention has been placed on the power of new analytic models to exploit the  
48  
49 increasing volume of data that are stored in aged care IT systems. Initial research to capitalise  
50  
51 on this valuable information source has focused on retrospective and descriptive analyses.<sup>16 17</sup>  
52  
53 This foundational research has demonstrated the potential value of these data to better  
54  
55 understand quality of care issues.<sup>18-20</sup> Further, this work has shown that it is possible to create  
56  
57 automated risk-adjusted indicators of client care and outcomes by linking existing  
58  
59  
60

1  
2  
3 administrative, clinical and care management datasets routinely collected by providers.<sup>21 22</sup> A  
4  
5 number of studies in the acute care sector have shown the possibilities of leveraging  
6  
7 electronic data systems to implement real-time predictive risk models.<sup>23-26</sup> These models have  
8  
9 been used to identify clients who are at risk of adverse events earlier and facilitate the uptake  
10  
11 of tailored evidence-based strategies by time-poor staff.<sup>27-30</sup>  
12  
13  
14  
15  
16  
17

## 18 **Dashboards**

19  
20 Dashboards offer promise in integrating multiple data sources and supporting the use of  
21  
22 predictive analytics to improve client care. They allow for a single-view summary of an  
23  
24 individual's information and can provide decision-related information using text and visual  
25  
26 features. These summaries can be dynamic; reflecting changes in clinical environments and a  
27  
28 person's information in real-time. Dashboards typically utilise graphical information displays  
29  
30 and colour, allowing users to easily interact with and explore important information.  
31  
32 Dashboards may include features that alert users to areas requiring attention, such as  
33  
34 deteriorating patients or those at high risk of injury or harm and provide support tools to  
35  
36 guide staff members' responses to alerts. These features allow for the quick and targeted  
37  
38 communication of information, helping reduce the cognitive effort of the user and enabling  
39  
40 them to make informed decisions effectively and efficiently (Figure 1).  
41  
42  
43  
44  
45  
46  
47  
48  
49  
50  
51  
52  
53  
54  
55  
56  
57  
58  
59  
60

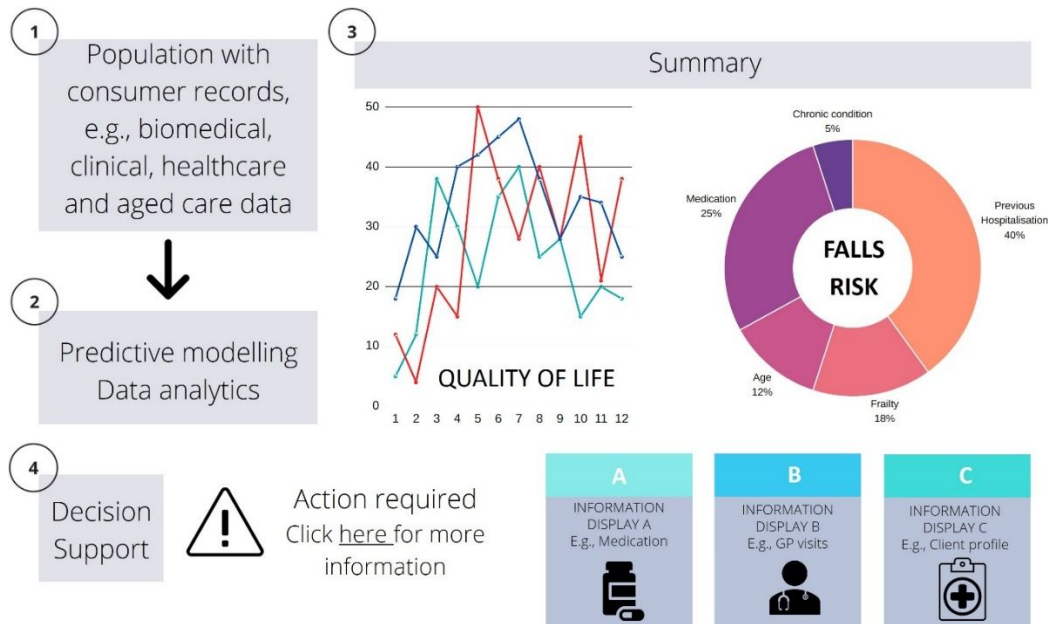

**Figure 1: Example of a dashboard to predict risk and deliver actionable information**

Dashboards have predominantly been implemented and evaluated in primary, acute and mental health care.<sup>31-33</sup> In these settings, dashboards have been shown to improve clinician situational awareness, decision-making, and guideline adherence, positively affecting outcomes such as mortality.<sup>31 34</sup> At an organisational-level, dashboards can improve the detection of overdue tasks, procedural bottlenecks, and support better resource allocation.<sup>34</sup> At the client-level, they have the potential to make meaningful information accessible to clients and their families, placing individuals at the centre of their own information and care.

Dashboards are less commonly used in aged care settings, and this setting may encounter specific challenges with uptake and use due to poor ICT infrastructure and support services, and a workforce with lower computer experience and digital literacy skills than found in acute care settings.<sup>35 36</sup> Co-design is an important strategy to deliver interventions which take account of contextual factors and to facilitate ownership of interventions, and motivate uptake and user satisfaction.<sup>31 36</sup> To ensure that dashboards are tailored to the skills,

1  
2  
3 needs and preferences of their users, as well as available resources, rigorous assessment and  
4  
5 evaluation of dashboard design, use and work-integration are necessary.  
6  
7  
8  
9

## 10 **Rationale**

11  
12 [Organisation name blinded for peer-review], a large non-profit aged care provider located in  
13  
14 New South Wales (NSW), Australia, identified the critical need for leveraging their  
15  
16 electronic systems to support evidence-based practice across their services. [Organisation  
17  
18 name blinded for peer-review] is partnering with [Organisations' names blinded for peer-  
19  
20 review] to design, develop, implement and evaluate an interactive dashboard comprising  
21  
22 integrated client information, risk indicators and decision support. This dashboard is intended  
23  
24 to be used by [Organisation name blinded for peer-review] staff (e.g., registered nurses, care  
25  
26 workers, care advisors, managers), clients, informal caregivers, and general practitioners  
27  
28 (GPs) providing services to [Organisation name blinded for peer-review] clients, collectively  
29  
30 referred to as 'users'. It is expected that the dashboard will be used to identify and support  
31  
32 older adults at risk of poor outcomes in residential aged care facilities and community-based  
33  
34 aged care. The dashboard will be iteratively co-designed and evaluated with stakeholders to  
35  
36 (i) allow care managers to monitor robust real-time indicators of care quality, (ii) support  
37  
38 staff members and GPs to obtain a client overview 'at-a-glance' and make evidence-based  
39  
40 decisions about their care, and (iii) provide timely, meaningful information to older persons  
41  
42 and their families.  
43  
44  
45  
46  
47  
48  
49

### 50 *Priority aged care challenges*

51  
52 Risk indicators will initially target two priority aged care challenges relevant to both  
53  
54 residential- and community-based care populations: (i) hospital-related falls; and (ii) Quality  
55  
56 of Life (QoL).  
57  
58  
59  
60

- 1  
2  
3 (i) Falls are a major cause of harm to older Australians, experienced by more than a  
4  
5 third of adults aged  $\geq 65$  every year.<sup>37</sup> In 2014-15 in Australia, over 1.4 million  
6  
7 hospital days were attributable to fall-related injuries among older adults,<sup>38</sup>  
8  
9 costing  $> \$500$  million AUD.<sup>39</sup> Falls are the cause of 92% of injury  
10  
11 hospitalisations among aged care residents.<sup>40</sup> Identifying those at risk is the  
12  
13 starting point to improve falls management. However, falls risk tools currently in  
14  
15 use are stand-alone assessments that are rarely integrated with dynamic  
16  
17 information about an individual's risk, such as changes in medications or health  
18  
19 following a hospitalisation.<sup>41</sup>  
20  
21  
22  
23  
24 (ii) QoL has been recognised by international peak health and healthcare  
25  
26 organisations as an important aspect of active ageing and quality care in long-term  
27  
28 care settings.<sup>6 42 43</sup> Older Australians report QoL as a central goal for aged care.<sup>44</sup>  
29  
30 While research on the relationships between QoL and clinical outcomes in aged  
31  
32 care settings is sparse, some evidence suggests that lower QoL scores are  
33  
34 associated with poorer clinical outcomes in residential aged care clients.<sup>45-47</sup>  
35  
36 Alongside the increased recognition of the importance of QoL for older adults,  
37  
38 valid and reliable QoL tools have recently been developed, including those  
39  
40 suitable for use by people with dementia.<sup>45 48-53</sup> Currently, reporting on QoL in  
41  
42 Australian aged care is not mandatory, and while recent national policy requires  
43  
44 community care providers to report on client wellness,<sup>54</sup> relatively little is known  
45  
46 about modifiable factors contributing to QoL in aged care.  
47  
48  
49  
50  
51

52 These two exemplar indicators will serve as an initial model to test embedding risk  
53  
54 indicators in an electronic dashboard within aged care settings. Other indicators may be  
55  
56 added during the study in response to feedback from users.  
57  
58  
59  
60

## Study aim

The aim of this study is to describe the design and testing of a dashboard in residential and community-based aged care settings, and to outline longer-term plans for dashboard implementation and evaluation.

## METHODS AND ANALYSIS

### Study design

The research comprises three components: 1. Co-design of the digital dashboard with users; 2. Integration of data sources and development of risk models; and 3. Dashboard prototype testing with users. The processes and data sources for each component are summarised in Figure 2. The study gained ethics approval in December 2019, with data collection commencing April 2020.

|                     | <b>1. Dashboard co-design</b>                                                                                                                                       | <b>2. Data integration and risk models</b>                                                                                                                                 | <b>3. Prototype testing</b>                                                                                                               |
|---------------------|---------------------------------------------------------------------------------------------------------------------------------------------------------------------|----------------------------------------------------------------------------------------------------------------------------------------------------------------------------|-------------------------------------------------------------------------------------------------------------------------------------------|
| <b>Processes</b>    | <ul style="list-style-type: none"> <li>Investigate users' needs and preferences</li> <li>Receive feedback from users on dashboard prototype</li> </ul>              | <ul style="list-style-type: none"> <li>Integrate siloed aged care data sources</li> <li>Develop and validate risk models using linked health and aged care data</li> </ul> | <ul style="list-style-type: none"> <li>Conduct usability testing with users</li> </ul>                                                    |
| <b>Data sources</b> | <ul style="list-style-type: none"> <li>Observations of routine work</li> <li>Interviews</li> <li>Focus groups</li> <li>Workshop</li> <li>Community forum</li> </ul> | <ul style="list-style-type: none"> <li>[Blinded for review] client records</li> <li>NSW EDDC</li> <li>NSW APDC</li> <li>NSW RBDM</li> </ul>                                | <ul style="list-style-type: none"> <li>Think-aloud task-based scenario walkthroughs</li> <li>Follow-up interviews/focus groups</li> </ul> |

NSW=New South Wales; EDDC=Emergency Department Data Collection; APDC=Admitted Patient Data Collection; RBDM=Registry of Births, Deaths and Marriages registries



## Figure 2: Overview of study design: components, processes, and data sources

### Study population

[Organisation name blinded for peer-review] provides a variety of support services across the life span, including aged care, mental health services, palliative care, and family support. This study involves [Organisation name blinded for peer-review] 23 residential aged care facilities, and their community-based aged care service outlets which provide services to older people in their homes. The risk modelling and data integration component of this study will include data about all of [Organisation name blinded for peer-review] residential and community care clients over the previous five years (1 July 2014 - 31 December 2019, n=~14,800). The co-design and prototype testing components will involve samples drawn from [Organisation name blinded for peer-review] staff members (registered nurses, care workers, care managers), clients, informal caregivers and GPs.

### Methods and analysis

#### *Component 1: Co-design of the digital dashboard with users*

The design of the dashboard will draw on existing literature in human factors design and evaluation, evidence of features of effective dashboards, and input from users. A multi-method approach will be taken to investigate users' needs and preferences, and to examine how the dashboard could be integrated into everyday practices. This will include:

- Direct observations of staff members' routine work interactions including type, location and duration of activities. Observations will be conducted unobtrusively (e.g., at a distance).
- Interviews and focus groups with staff members to elicit their perspectives on core

1  
2  
3 information to be included in the dashboard, dashboard features (e.g., presentation of  
4 information and inclusion of decision support tools), how decision-making guidance  
5 for the target priority areas (hospital-related falls and QoL) could be of value, and work  
6 processes or challenges garnered from the direct observations.  
7  
8  
9  
10  
11

- 12 • Interviews and focus groups with aged care clients and informal caregivers to explore  
13 their preferences and experiences relating to access to medical and aged care  
14 information, involvement in decision-making, and use of technology. To better  
15 understand how clients and their informal caregivers would like healthcare and aged  
16 care information communicated, they will also be asked for their opinions on potential  
17 dashboard features, information to be included in the dashboard, and the dashboard's  
18 presentation of client information.  
19  
20  
21  
22  
23  
24  
25  
26  
27  
28
- 29 • Interviews with GPs focusing on how the dashboard could support improved  
30 communication between aged care and primary care. This will include, for example,  
31 discussion of current processes and difficulties experienced in the transfer of  
32 information between aged care facilities and GP practice records. Exploration of GP  
33 use of decision support tools will also occur.  
34  
35  
36  
37  
38  
39
- 40 • Working groups with users (staff members, GPs, clients and informal caregivers) to  
41 develop the decision support for the risk indicators will be established. The decision  
42 support will comprise evidence-based information on actions to be taken when clients are  
43 identified as at risk.  
44  
45  
46  
47  
48  
49
- 50 • Mock-ups of the dashboard prototype will be presented to staff members, clients and  
51 informal caregivers during focus groups and a community forum, to seek feedback that  
52 will guide revisions of the dashboard. GPs feedback on the mock-ups will be sought  
53 through a working group. As the dashboard is intended for different users, the  
54 presentation of information, dashboard features and evidence-based decision support  
55  
56  
57  
58  
59  
60

1  
2  
3 will be tailored towards each user group and therefore, mock-ups will be user-specific.

4  
5 Users' feedback will provide insights into their perspectives of the prototype design,  
6  
7  
8 functionality and modifications needed.  
9

10 Qualitative data from the focus groups, interviews and workshop will be analysed using  
11  
12 a structured content analysis approach.<sup>55 56</sup> A critical realist approach, a structured method for  
13  
14 examining for whom and under what circumstances interventions work, will be applied. The  
15  
16 influence of subjectivity and the social context on data collection and analysis will be  
17  
18 acknowledged. Data analysis will be conducted in NVivo version 12.<sup>57</sup> Two researchers will  
19  
20 perform the initial coding of these data, producing a list of codes which will then be reviewed  
21  
22 by the research team. Any discrepancies in coding will be discussed and used to modify the list  
23  
24 of codes until the research team agrees on code application. The codes will then be sorted into  
25  
26 preliminary domains and themes, which will be repeatedly reviewed and refined to maximise  
27  
28 homogeneity prior to developing an analytic narrative. Data from the observation sessions will  
29  
30 be descriptively analysed for time spent on different activities, interactions with people, tools  
31  
32 and other methods used to complete tasks, and rate of interruptions.  
33  
34  
35  
36  
37  
38  
39  
40

### 41 ***Component 2: Integration of data sources and development of risk models***

42  
43 Building upon the feedback from users in component 1, we will develop a list of information  
44  
45 items that will be used to populate the dashboard, based on the data available from  
46  
47 [Organisation name blinded for peer-review] sources (Table 1). Two exemplar risk models,  
48  
49 one for each priority area, will be developed through the linkage of available historical  
50  
51 [Organisation name blinded for peer-review] client records with data from the NSW  
52  
53 Emergency Department Data Collection (EDDC), the NSW Admitted Patient Data Collection  
54  
55 (APDC) and the NSW Registry of Births, Deaths and Marriages (RBDM) registries (see Table  
56  
57  
58  
59  
60 1 for descriptions of data sources). Data will be extracted for all [Organisation name blinded

for peer-review] residential and community care clients over the previous 5 years. Hospital data for these clients will be requested from the data custodians of the NSW EDDC, the NSW APDC and the NSW RBDM death registrations. The Centre for Health Record Linkage (CHeReL) will conduct the data linkage in order to allow preservation of individual confidentiality as data custodians supply only personal identifiers to CHeReL without clinical data. Only clinical data without personal identifiers will be supplied to researchers.

Candidate variables to be evaluated as predictors will be based on existing literature and the extracted data from [Organisation name blinded for peer-review] client records (see Table 1). Multivariable discrete time survival (DTS) modelling will be used.<sup>58 59</sup> A rounded score for each risk factor in the final model will be calculated by dividing the regression coefficient of each covariate by the lowest coefficient in the model. This allows for total risk scores to be calculated for each person by summing the scores for each present risk factor. Risk models will be internally validated using bootstrap resampling.

**Table 1: Data sources for project component 1 risk models**

| <b>Data source</b>       | <b>Description</b>                                                                                                                                                                                                                    |
|--------------------------|---------------------------------------------------------------------------------------------------------------------------------------------------------------------------------------------------------------------------------------|
| Aged care client records | This electronic health and care management information system includes client demographic information, clinical data, client needs data, service and activity data, medications administered, social factors, and QoL measures.       |
| EDDC                     | This collection provides information about patient presentations to the emergency departments of public hospitals in NSW, such as admission and separation dates, mode of separation, referral source, triage category and diagnoses. |

---

|    |               |                                                                       |
|----|---------------|-----------------------------------------------------------------------|
| 1  |               |                                                                       |
| 2  |               |                                                                       |
| 3  | APDC          | This collection records all admitted patient services provided by NSW |
| 4  |               |                                                                       |
| 5  |               | public hospitals, public psychiatric hospitals, public multi-purpose  |
| 6  |               | services, private hospitals, and private day procedures centres. Data |
| 7  |               |                                                                       |
| 8  |               | includes admission and separation dates, demographics, mode of        |
| 9  |               |                                                                       |
| 10 |               | separation, diagnosis and procedures.                                 |
| 11 |               |                                                                       |
| 12 |               |                                                                       |
| 13 |               |                                                                       |
| 14 |               |                                                                       |
| 15 | RBDM          | This dataset contains date and cause of death information for deaths  |
| 16 |               |                                                                       |
| 17 | registrations | occurring in NSW.                                                     |
| 18 |               |                                                                       |
| 19 |               |                                                                       |

---

20 NSW=New South Wales; EDDC= NSW Emergency Department Data Collection; APDC= Admitted Patient  
 21 Data Collection; RBDM=Registry of Births, Deaths and Marriages registries  
 22  
 23  
 24  
 25

### 26 ***Component 3: Dashboard prototype testing***

27  
 28  
 29 User-specific prototypes of the dashboard will be created by a specialist IT programmer and  
 30 [Organisation name blinded for peer-review] IT staff using and adapting modifiable modules  
 31 within [Organisation name blinded for peer-review] existing infrastructure. Client health and  
 32 care information, along with the risk models, will be integrated into the dashboard to a) provide  
 33 an overview of clients' information (e.g., current medications) and b) alert users to changes in  
 34 clients' risk levels for the two priority risk indicators in real-time. Each indicator will be  
 35 accompanied by evidence-based decision guidance to direct actions in response the level of  
 36 risk identified.  
 37  
 38  
 39  
 40  
 41  
 42  
 43  
 44  
 45  
 46

47  
 48 To test the dashboard prototype, staff members will be guided through task-based  
 49 scenario 'walk-throughs' with a think-aloud approach.<sup>60</sup> Subsequent follow-up interviews or  
 50 focus groups will be conducted to explore staff members' perceptions of the dashboard and  
 51 alignment with workflow. Clients and informal caregivers will also engage in scenario walk-  
 52 throughs, along with follow-up interviews or focus groups to elicit their views on their use of  
 53 the dashboard. Qualitative data from the think-aloud activity and interviews will be analysed  
 54  
 55  
 56  
 57  
 58  
 59  
 60

1  
2  
3 using the same methods as Component 2.  
4  
5  
6  
7

### 8 **Longer-term plans for dashboard implementation and evaluation**

10 While the wide-spread implementation and evaluation of the dashboard are not the focus of  
11 this protocol, a broad overview of an anticipated large-scale trial to investigate the scalability  
12 and effectiveness is outlined below. Once the dashboard has been revised in line with the  
13 findings from prototype testing, a hybrid stepped-wedge cluster randomised controlled trial  
14 will be carried out. This will involve implementing the dashboard in 12 [Organisation name  
15 blinded for peer-review] residential facilities and 12 community care units, with two residential  
16 aged care facilities and two community care units randomly selected for dashboard  
17 implementation each month for six months. The remaining facilities and community units will  
18 continue with usual care until the end of the trial. Implementation processes will utilise  
19 [Organisation name blinded for peer-review] staff training mechanisms and provide workshops  
20 for staff and clients/informal caregivers on dashboard purpose and use, using practical  
21 examples and incorporating behaviour change principles to support both intervention fidelity  
22 and effectiveness. As part of the randomised controlled trial, process evaluation will be  
23 conducted to identify barriers and facilitators to dashboard use, and economic evaluations to  
24 assess resource use and costs associated with the development and implementation of the  
25 dashboard will be undertaken.  
26  
27  
28  
29  
30  
31  
32  
33  
34  
35  
36  
37  
38  
39  
40  
41  
42  
43  
44  
45  
46  
47  
48  
49  
50

### 51 **Patient and public involvement**

52 This research centres on the philosophy that users are *co-creators of* the research rather than  
53 *participants in* the research.<sup>61 62</sup> The project proposal was co-designed from inception with key  
54 [Organisation name blinded for peer-review] staff in a series of workshops starting in  
55  
56  
57  
58  
59  
60

1  
2  
3 December 2017. In order to ensure that the research will have meaningful and real-world  
4 applications, users (staff, aged care clients, informal caregivers, and GPs) will continue to have  
5 strong engagement across the various stages of the research.<sup>61</sup> We aim to elicit users' expert  
6 knowledge, preferences and experiences through a range of methods, namely, interviews,  
7 observations, focus groups, workshops and forums. This feedback will be used to guide  
8 development of the dashboard, facilitate its implementation, and inform future evaluations of  
9 the intervention. Relevant stakeholders including [Organisation name blinded for peer-review]  
10 representatives and users will be included in publications arising from this research to ensure  
11 appropriate interpretation of findings.<sup>61</sup>  
12  
13  
14  
15  
16  
17  
18  
19  
20  
21  
22  
23  
24  
25  
26

## 27 **ETHICS AND DISSEMINATION**

28  
29 This study has received ethical approval from the NSW Population & Health Services  
30 Research Ethics Committee [Details blinded for peer-review] and the [University name and  
31 details blinded for peer-review]. The findings of this research project will be disseminated as  
32 peer-reviewed journal articles and as presentations at national and international conferences,  
33 seminars and workshops. [Organisation name blinded for peer-review], will play a valuable  
34 role to support policy translation using their extensive advocacy networks across health  
35 policy portfolios. Research findings will be disseminated through policy briefs and regular  
36 meetings with parliamentary staff and policy-makers. Utilising the partnership with  
37 [Organisation name blinded for peer-review], findings will be relayed back to [Organisation  
38 name blinded for peer-review] to inform decisions, and their networks will be used to present  
39 findings to clients and their informal caregivers in newsletters.  
40  
41  
42  
43  
44  
45  
46  
47  
48  
49  
50  
51  
52  
53  
54  
55  
56

## 57 **CONCLUSIONS**

1  
2  
3 This protocol outlines the design and testing of a predictive analytic dashboard for use in  
4 residential- and community-based aged care settings. The dashboard will allow care providers  
5 to detect changes in clients' risk levels and will deliver actionable evidence-based  
6 information through the decision support function. Identifying at-risk clients earlier is  
7 expected to reduce hospital-related falls and improve QoL, two key priority areas for aged  
8 care. The dashboard will also allow for the provision of timely and meaningful information to  
9 aged care clients and their informal caregivers. It is anticipated that the dashboard will serve  
10 as a model for both Australian and international aged care organisations wanting to integrate  
11 siloed data and use informatics to facilitate real-time quality monitoring and management of  
12 client outcomes. Lessons learned from this project may be applied more broadly to the co-  
13 design of interventions with users, as well as the utilisation of data and IT systems in aged  
14 care settings.  
15  
16  
17  
18  
19  
20  
21  
22  
23  
24  
25  
26  
27  
28  
29  
30  
31  
32  
33

### 34 LIST OF ABBREVIATIONS

35  
36 **AUD** Australian dollars

37  
38  
39 **APDC** Admitted Patient Data Collection

40  
41  
42 **CHeReL** Centre for Health Record Linkage

43  
44  
45 **EDDC** Emergency Department Data Collection

46  
47  
48 **GP** General Practitioners

49  
50  
51 **ICT** Information and communication technologies

52  
53 [Blinded for peer-review]

54  
55 **NHMRC** National Health and Medical Research Council

56  
57  
58 **NSW** New South Wales

59  
60 **QoL** Quality of Life



1  
2  
3 **RBDM** Registry of Births, Deaths and Marriages  
4

5  
6 [Blinded for peer-review]  
7

8 **SW-CRCT** Stepped-wedge cluster randomised controlled trial  
9

10  
11  
12  
13 **REFERENCES**  
14

- 15  
16 1. Royal Commission into Aged Care Quality and Safety. Interim Report: Neglect. Adelaide,  
17 Australia: Commonwealth of Australia, 2019.  
18  
19 2. Age UK. Briefing: Health and Care of Older People in England 2019. London, UK: Age  
20 UK, 2019.  
21  
22 3. European Social Policy Network (ESPN). Challenges in Long-term Care in Europe: A  
23 Study of National Policies. Brussels, BE: European Commission, 2018.  
24  
25 4. Organisation for Economic Co-operation and Development. Ageing and long-term care.  
26 Health at a Glance 2019: OECD Indicators. Paris, France: OECD 2019:217-39.  
27  
28 5. Ludlow K, Churrua K, Mumford V, et al. Unfinished care in residential aged care  
29 facilities: An integrative review. *The Gerontologist* 2019:gnz145. doi:  
30 10.1093/geront/gnz145  
31  
32 6. World Health Organization. World Report on Ageing and Health. Geneva, Switzerland:  
33 WHO, 2015.  
34  
35 7. Royal Commission into Aged Care Quality and Safety. A History of Aged Care Reviews.  
36 Adelaide, Australia: Commonwealth of Australia, 2020.  
37  
38 8. Royal Commission into Aged Care Quality and Safety. Home page. 2020 Available from:  
39 <https://agedcare.royalcommission.gov.au/Pages/default.aspx>.  
40  
41 9. Royal Commission into Aged Care Quality and Safety. Australia's Aged Care System:  
42 Assessing the Views And Preferences of the General Public for Quality of Care and  
43 Future Funding. Adelaide, Australia: Commonwealth of Australia, 2020.  
44  
45  
46  
47  
48  
49  
50  
51  
52  
53  
54  
55  
56  
57  
58  
59  
60

- 1  
2  
3 10. Alexander G, Georgiou A. An international comparison of technology utilization in an  
4 aged care setting. *Information Technology in Aged Care*; 2017 20-22 November;  
5 Gold Coast, Australia.  
6  
7  
8  
9  
10 11. Forte P. Data rich, information poor: Data, information and decision support in the NHS.  
11  
12 *European Journal of Information Systems* 1994;3(2):148-54. doi:  
13 10.1057/ejis.1994.15  
14  
15  
16 12. Bernus P, Noran O. Data Rich – But Information Poor. 18th Working Conference on  
17 Virtual Enterprises (PROVE); 2017 18-20 September; Vicenza, Italy. Springer  
18 International Publishing.  
19  
20  
21  
22  
23 13. Royal Commission into Aged Care Quality and Safety. International and National Quality  
24 and Safety Indicators for Aged Care. Adelaide, Australia: Commonwealth of  
25 Australia, 2020.  
26  
27  
28  
29  
30 14. Royal Commission into Aged Care Quality and Safety. Australia far behind in monitoring  
31 aged care quality. Adelaide, Australia: Royal Commission into Aged Care Quality  
32 and Safety; 2020 Available from: [https://agedcare.royalcommission.gov.au/news-and-](https://agedcare.royalcommission.gov.au/news-and-media/australia-far-behind-monitoring-aged-care-quality)  
33 [media/australia-far-behind-monitoring-aged-care-quality](https://agedcare.royalcommission.gov.au/news-and-media/australia-far-behind-monitoring-aged-care-quality).  
34  
35  
36  
37  
38  
39 15. Australian Government. Department of Health. National Aged Care Mandatory Quality  
40 Indicator Program. Canberra, Australia: Commonwealth of Australia; 2020 Available  
41 from: [https://www.health.gov.au/initiatives-and-programs/national-aged-care-](https://www.health.gov.au/initiatives-and-programs/national-aged-care-mandatory-quality-indicator-program)  
42 [mandatory-quality-indicator-program](https://www.health.gov.au/initiatives-and-programs/national-aged-care-mandatory-quality-indicator-program).  
43  
44  
45  
46  
47  
48 16. van Weel JM, Renehan E, Ervin KE, et al. Home care service utilisation by people with  
49 dementia-A retrospective cohort study of community nursing data in Australia. *Health*  
50 *& Social Care in the Community* 2019;27(3):665-75. doi: 10.1111/hsc.12683  
51  
52  
53  
54  
55 17. Lind KE, Raban MZ, Brett L, et al. Measuring the prevalence of 60 health conditions in  
56 older Australians in residential aged care with electronic health records: A  
57  
58  
59  
60

- 1  
2  
3 retrospective dynamic cohort study. *Population Health Metrics* 2020;18(1):25. doi:  
4  
5 10.1186/s12963-020-00234-z  
6  
7
- 8 18. Lind KE, Raban MZ, Georgiou A, et al. NSAID use among residents in 68 residential  
9  
10 aged care facilities 2014 to 2017: An analysis of duration, concomitant medication  
11  
12 use, and high-risk conditions. *Pharmacoepidemiology and Drug Safety*  
13  
14 2019;28(11):1480-88. doi: 10.1002/pds.4866  
15  
16
- 17 19. Raban MZ, Lind KE, Day RO, et al. Trends, determinants and differences in antibiotic  
18  
19 use in 68 residential aged care homes in Australia, 2014-2017: A longitudinal analysis  
20  
21 of electronic health record data. *BMC Health Services Research* 2020;20(1):883. doi:  
22  
23 10.1186/s12913-020-05723-3  
24  
25
- 26 20. Lind KE, Raban MZ, Georgiou A, et al. Duration of antipsychotic medication use by aged  
27  
28 care facility residents with dementia. *Alzheimer Disease & Associated Disorders*  
29  
30 2019;33(4):331-38. doi: 10.1097/wad.0000000000000336  
31  
32
- 33 21. Pont LG, Raban MZ, Jorgensen ML, et al. Leveraging new information technology to  
34  
35 monitor medicine use in 71 residential aged care facilities: Variation in polypharmacy  
36  
37 and antipsychotic use. *International Journal for Quality in Health Care*  
38  
39 2018;30(10):810-16. doi: 10.1093/intqhc/mzy098  
40  
41
- 42 22. Jorgensen M, Siette J, Georgiou A, et al. Longitudinal variation in pressure injury  
43  
44 incidence among long-term aged care facilities. *International Journal for Quality in*  
45  
46 *Health Care* 2018:mzy087-mzy87. doi: 10.1093/intqhc/mzy087  
47  
48
- 49 23. Parikh RB, Kakad M, Bates DW. Integrating predictive analytics into high-value care:  
50  
51 The dawn of precision delivery. *Journal of the American Medical Association*  
52  
53 2016;315(7):651-52. doi: 10.1001/jama.2015.19417  
54  
55  
56  
57  
58  
59  
60

- 1  
2  
3 24. Mahmoudi E, Kamdar N, Kim N, et al. Use of electronic medical records in development  
4 and validation of risk prediction models of hospital readmission: Systematic review.  
5  
6  
7  
8 *BMJ* 2020;369:m958. doi: 10.1136/bmj.m958  
9
- 10 25. Goldstein BA, Navar AM, Pencina MJ, et al. Opportunities and challenges in developing  
11 risk prediction models with electronic health records data: A systematic review.  
12  
13  
14 *Journal of the American Medical Informatics Association* 2017;24(1):198-208. doi:  
15  
16 10.1093/jamia/ocw042  
17
- 18 26. Classen D, Li M, Miller S, et al. An electronic health record-based real-time analytics  
19 program for patient safety surveillance and improvement. *Health Affairs*  
20  
21  
22 2018;37(11):1805-12. doi: 10.1377/hlthaff.2018.0728  
23  
24  
25
- 26 27. Dey M, Rautaray SS. Study and analysis of data mining algorithms for healthcare  
27 decision support system. *International Journal of Computer Science and Information*  
28  
29 *Technologies* 2014;5(1):470-77.  
30  
31  
32
- 33 28. Wang Y, Kung L, Byrd TA. Big data analytics: Understanding its capabilities and  
34 potential benefits for healthcare organizations. *Technological Forecasting and Social*  
35  
36 *Change* 2018;126:3-13. doi: 10.1016/j.techfore.2015.12.019  
37  
38  
39
- 40 29. Kwan JL, Lo L, Ferguson J, et al. Computerised clinical decision support systems and  
41 absolute improvements in care: Meta-analysis of controlled clinical trials. *BMJ*  
42  
43 2020;370:m3216. doi: 10.1136/bmj.m3216  
44  
45  
46
- 47 30. Gilbert T, Neuburger J, Kraindler J, et al. Development and validation of a Hospital  
48 Frailty Risk Score focusing on older people in acute care settings using electronic  
49 hospital records: An observational study. *The Lancet* 2018;391(10132):1775-82. doi:  
50  
51 10.1016/S0140-6736(18)30668-8  
52  
53  
54  
55  
56  
57  
58  
59  
60

- 1  
2  
3 31. Dowding D, Randell R, Gardner P, et al. Dashboards for improving patient care: Review  
4 of the literature. *International Journal of Medical Informatics* 2015;84(2):87-100. doi:  
5  
6 10.1016/j.ijmedinf.2014.10.001  
7  
8  
9  
10 32. Khairat SS, Dukkipati A, Lauria HA, et al. The impact of visualization dashboards on  
11 quality of care and clinician satisfaction: Integrative literature review. *JMIR Human*  
12  
13 *Factors* 2018;5(2):e22. doi: 10.2196/humanfactors.9328  
14  
15  
16  
17 33. Buttigieg SC, Pace A, Rathert C. Hospital performance dashboards: A literature review.  
18  
19 *Journal of Health Organization and Management* 2017;31(3):385-406. doi:  
20  
21 10.1108/jhom-04-2017-0088  
22  
23  
24 34. Franklin A, Gantela S, Shifarrow S, et al. Dashboard visualizations: Supporting real-time  
25 throughput decision-making. *Journal of Biomedical Informatics* 2017;71:211-21. doi:  
26  
27 10.1016/j.jbi.2017.05.024  
28  
29  
30  
31 35. Kapadia V, Ariani A, Li J, et al. Emerging ICT implementation issues in aged care.  
32  
33 *International Journal of Medical Informatics* 2015;84(11):892-900. doi:  
34  
35 10.1016/j.ijmedinf.2015.07.002  
36  
37  
38 36. Vogelsmeier AA, Halbesleben JR, Scott-Cawiezell JR. Technology implementation and  
39 workarounds in the nursing home. *Journal of the American Medical Informatics*  
40  
41 *Association* 2008;15(1):114-19. doi: 10.1197/jamia.M2378  
42  
43  
44  
45 37. World Health Organization. WHO global report on falls prevention in older age. Paris,  
46 France: WHO, 2007.  
47  
48  
49 38. Australian Institute of Health and Welfare. Trends in Hospitalised Injury Due to Falls in  
50 Older People, 2002–03 to 2014–15. Canberra, Australia: AIHW, 2018.  
51  
52  
53  
54 39. Watson WL, Clapperton AJ, Mitchell RJ. The cost of fall-related injuries among older  
55 people in NSW, 2006–07. *New South Wales Public Health Bulletin* 2011;22(4):55-59.  
56  
57 doi: 10.1071/NB10002  
58  
59  
60

- 1  
2  
3 40. Mitchell R, Harvey L, Draper B, et al. Risk factors associated with residential aged care,  
4  
5 respite and transitional aged care admission for older people following an injury-  
6  
7 related hospitalisation. *Archives of Gerontology and Geriatrics* 2017;72:59-66. doi:  
8  
9 10.1016/j.archger.2017.05.012  
10  
11  
12 41. Lucero RJ, Lindberg DS, Fehlberg EA, et al. A data-driven and practice-based approach  
13  
14 to identify risk factors associated with hospital-acquired falls: Applying manual and  
15  
16 semi- and fully-automated methods. *International Journal of Medical Informatics*  
17  
18 2019;122:63-69. doi: 10.1016/j.ijmedinf.2018.11.006  
19  
20  
21 42. Organisation for Economic Co-operation and Development, European Union. A Good  
22  
23 Life in Old Age? Monitoring and Improving Quality in Long-Term Care. Paris,  
24  
25 France: OECD Publishing, 2013.  
26  
27  
28 43. Tesch-Roemer C. Active Ageing and Quality of Life in old Age. Geneva, Switzerland:  
29  
30 UNECE, 2010.  
31  
32  
33 44. COTA Australia. Measuring Quality and Consumer Choice in Aged Care. Canberra,  
34  
35 Australia: COTA Australia, 2018.  
36  
37  
38 45. Courtney M, Edwards H, Stephan J, et al. Quality of life measures for residents of aged  
39  
40 care facilities: A literature review. *Australasian Journal on Ageing* 2003;22(2):58-64.  
41  
42 doi: 10.1111/j.1741-6612.2003.tb00467.x  
43  
44  
45 46. Courtney M, O'Reilly M, Edwards H, et al. The relationship between clinical outcomes  
46  
47 and quality of life for residents of aged care facilities. *Australian Journal of Advanced*  
48  
49 *Nursing* 2009;26(4):49-57.  
50  
51  
52 47. Beer C, Flicker L, Horner B, et al. Factors associated with self and informant ratings of  
53  
54 the quality of life of people with dementia living in care facilities: A cross sectional  
55  
56 study. *PloS One* 2010;5(12):e15621-e21. doi: 10.1371/journal.pone.0015621  
57  
58  
59  
60

- 1  
2  
3 48. Bowling A, Rowe G, Adams S, et al. Quality of life in dementia: A systematically  
4  
5 conducted narrative review of dementia-specific measurement scales. *Aging & Mental*  
6  
7 *Health* 2015;19(1):13-31. doi: 10.1080/13607863.2014.915923  
8  
9
- 10 49. Missotten P, Dupuis G, Adam S. Dementia-specific quality of life instruments: A  
11  
12 conceptual analysis. *Int Psychogeriatr* 2016;28(8):1245-62. doi:  
13  
14 10.1017/s1041610216000417  
15  
16
- 17 50. Aspden T, Bradshaw SA, Playford ED, et al. Quality-of-life measures for use within care  
18  
19 homes: A systematic review of their measurement properties. *Age and Ageing*  
20  
21 2014;43(5):596-603. doi: 10.1093/ageing/afu089  
22  
23
- 24 51. Cleland J, Hutchinson C, McBain C, et al. Developing dimensions for a new preference-  
25  
26 based quality of life instrument for older people receiving aged care services in the  
27  
28 community. *Quality of Life Research* 2020 doi: 10.1007/s11136-020-02649-5  
29  
30
- 31 52. Cleland J, Hutchinson C, Khadka J, et al. A review of the development and application of  
32  
33 generic preference-based instruments with the older population. *Applied Health*  
34  
35 *Economics and Health Policy* 2019;17(6):781-801. doi: 10.1007/s40258-019-00512-4  
36  
37
- 38 53. Ratcliffe J, Flint T, Easton T, et al. An empirical comparison of the EQ-5D-5L,  
39  
40 DEMQOL-U and DEMQOL-Proxy-U in a Post-hospitalisation population of frail  
41  
42 older people living in residential aged care. *Applied Health Economics and Health*  
43  
44 *Policy* 2017;15(3):399-412. doi: 10.1007/s40258-016-0293-7  
45  
46
- 47 54. Australian Government. Commonwealth Home Support Programme, Program Manual  
48  
49 2018-2020. Canberra, Australia: Commonwealth of Australia, 2018.  
50  
51
- 52 55. Mayring P. Qualitative content analysis. In: Uwe F, von Kardoff E, Steinke I, eds. A  
53  
54 Companion to Qualitative Research. London, UK: SAGE Publications 2004:266-69.  
55  
56
- 57 56. Elo S, Kyngäs H. The qualitative content analysis process. *Journal of Advanced Nursing*  
58  
59 2008;62(1):107-15. doi: 10.1111/j.1365-2648.2007.04569.x  
60

- 1  
2  
3 57. QSR International. NVivo. Burlington, MA: QSR International; n.d. Available from:  
4  
5 <https://www.qsrinternational.com/nvivo-qualitative-data-analysis-software/home>.  
6  
7  
8 58. Tai P, Chapman J-AW, Yu E, et al. Disease-specific survival for limited-stage small-cell  
9  
10 lung cancer affected by statistical method of assessment. *BMC Cancer* 2007;7(1):31.  
11  
12 doi: 10.1186/1471-2407-7-31  
13  
14  
15 59. Prentice RL. Regression analysis of censored survival data with extensions to include  
16  
17 competing risks and case-control studies. *Environment International* 1978;1(6):321-  
18  
19 29. doi: 10.1016/0160-4120(78)90007-7  
20  
21  
22 60. Jaspers MW, Steen T, Van Den Bos C, et al. The think aloud method: A guide to user  
23  
24 interface design. *International Journal of Medical Informatics* 2004;73(11-12):781-  
25  
26 95. doi: 10.1016/j.ijmedinf.2004.08.003  
27  
28  
29 61. Brett L, Siette J, Nguyen A, et al. At the grassroots of home and community-based aged  
30  
31 care: strategies for successful consumer engagement. *BMJ Open* 2019;9(11):e028754.  
32  
33 doi: 10.1136/bmjopen-2018-028754  
34  
35  
36 62. Boylorn RM. Participants as co-researchers. In: Given LM, ed. *The SAGE Encyclopedia*  
37  
38 of Qualitative Research Methods. Thousand Oaks, CA: SAGE Publications 2008:599-  
39  
40 601.  
41  
42  
43  
44

## DECLARATIONS

### Competing interests

The authors declare that they have no competing interests.

### Funding

This project was funded by an Australian National Health and Medical Research Council (NHMRC) Partnership Project Grant in partnership with Anglicare (1170898). The NHMRC did not have any influence on the design of the study and collection, analysis, and



1  
2  
3 interpretation of data. MR is supported by an NHMRC Early Career Fellowship (1143941).  
4  
5 JW is supported by a NHMRC Elizabeth Blackburn Leadership Investigator Grant  
6  
7 (1174021). JB is supported by an NHMRC Leadership Investigator Grant (1176620), the  
8  
9 NHMRC Partnership Centre in Health System Sustainability (Grant ID 9100002) and  
10  
11 APP1135058.  
12  
13

### 14 15 **Authors' contributions**

16  
17 This protocol was based on a successful funding application prepared by the chief  
18  
19 investigators JW, MB, LCG, RD, JR, SRL, AG and JB with input from the associate  
20  
21 investigators (MZR, JC, EB, WYZ, DD, JR, DR), staff from the aged care partner  
22  
23 organisation (MC, AT, JS, JW), research partners (LO, CS, RH) and members of the project  
24  
25 team working on the research (KL, MJ, KEL, AND, JS, KS, MM). KL drafted the protocol  
26  
27 and all authors contributed to reviewing and approving the final version.  
28  
29  
30

### 31 32 **Acknowledgements**

33  
34 The authors wish to acknowledge our partners and collaborators; [Blinded for peer-review].  
35  
36  
37  
38  
39  
40  
41  
42  
43  
44  
45  
46  
47  
48  
49  
50  
51  
52  
53  
54  
55  
56  
57  
58  
59  
60

# BMJ Open

## Co-designing a dashboard of predictive analytics and decision support to drive care quality and client outcomes in aged care: A mixed-methods study protocol

|                               |                                                                                                                                                                                                                                                                                                                                                                                                                                                                                                                                                                                                                                                                                                                                                                                                                                                                                                                                                                                                                                                                                                                                                                                                                                                                                                                                                                                                                                                                                                                                                                                                                                                                                                                                                                                                                                                                                                                                                                                                                                                                                                                                                                                                                                                                                                                                                                                                                          |
|-------------------------------|--------------------------------------------------------------------------------------------------------------------------------------------------------------------------------------------------------------------------------------------------------------------------------------------------------------------------------------------------------------------------------------------------------------------------------------------------------------------------------------------------------------------------------------------------------------------------------------------------------------------------------------------------------------------------------------------------------------------------------------------------------------------------------------------------------------------------------------------------------------------------------------------------------------------------------------------------------------------------------------------------------------------------------------------------------------------------------------------------------------------------------------------------------------------------------------------------------------------------------------------------------------------------------------------------------------------------------------------------------------------------------------------------------------------------------------------------------------------------------------------------------------------------------------------------------------------------------------------------------------------------------------------------------------------------------------------------------------------------------------------------------------------------------------------------------------------------------------------------------------------------------------------------------------------------------------------------------------------------------------------------------------------------------------------------------------------------------------------------------------------------------------------------------------------------------------------------------------------------------------------------------------------------------------------------------------------------------------------------------------------------------------------------------------------------|
| Journal:                      | <i>BMJ Open</i>                                                                                                                                                                                                                                                                                                                                                                                                                                                                                                                                                                                                                                                                                                                                                                                                                                                                                                                                                                                                                                                                                                                                                                                                                                                                                                                                                                                                                                                                                                                                                                                                                                                                                                                                                                                                                                                                                                                                                                                                                                                                                                                                                                                                                                                                                                                                                                                                          |
| Manuscript ID                 | bmjopen-2021-048657.R1                                                                                                                                                                                                                                                                                                                                                                                                                                                                                                                                                                                                                                                                                                                                                                                                                                                                                                                                                                                                                                                                                                                                                                                                                                                                                                                                                                                                                                                                                                                                                                                                                                                                                                                                                                                                                                                                                                                                                                                                                                                                                                                                                                                                                                                                                                                                                                                                   |
| Article Type:                 | Protocol                                                                                                                                                                                                                                                                                                                                                                                                                                                                                                                                                                                                                                                                                                                                                                                                                                                                                                                                                                                                                                                                                                                                                                                                                                                                                                                                                                                                                                                                                                                                                                                                                                                                                                                                                                                                                                                                                                                                                                                                                                                                                                                                                                                                                                                                                                                                                                                                                 |
| Date Submitted by the Author: | 01-Jun-2021                                                                                                                                                                                                                                                                                                                                                                                                                                                                                                                                                                                                                                                                                                                                                                                                                                                                                                                                                                                                                                                                                                                                                                                                                                                                                                                                                                                                                                                                                                                                                                                                                                                                                                                                                                                                                                                                                                                                                                                                                                                                                                                                                                                                                                                                                                                                                                                                              |
| Complete List of Authors:     | <p>Ludlow, Kristiana; Macquarie University, Centre for Health Systems and Safety Research, Australian Institute of Health Innovation<br/> Westbrook, Johanna; Macquarie University, Centre for Health Systems and Safety Research, Australian Institute of Health Innovation,<br/> Jorgensen, Mikaela; Macquarie University, Centre for Health Systems and Safety Research, Australian Institute of Health Innovation<br/> Lind, Kimberly ; The University of Arizona, Department of Health Promotion Sciences, Mel &amp; Enid Zuckerman College of Public Health<br/> Baysari, Melissa; The University of Sydney Faculty of Medicine and Health, Discipline of Biomedical Informatics and Digital Health, Charles Perkins Centre<br/> Gray, Len; The University of Queensland, Centre for Research in Geriatric Medicine<br/> Day, Richard; University of New South Wales, St Vincent's Clinical School<br/> Ratcliffe, Julie; Flinders University of South Australia, College of Nursing and Health Sciences;<br/> Lord, Stephen; Neuroscience Research Australia; University of New South Wales, School of Public health and Community Medicine<br/> Georgiou, A; Macquarie University, Centre for Health Systems and Safety Research, Australian Institute of Health Innovation<br/> Braithwaite, Jeffrey; Macquarie University, Centre for Healthcare Resilience and Implementation Science, Australian Institute of Health Innovation; ISQua<br/> Raban, Magdalena; Macquarie University, Centre for Health Systems and Safety Research, Australian Institute of Health Innovation<br/> Close, Jacqueline; Neuroscience Research Australia<br/> Beattie, Elizabeth; Queensland University of Technology, School of Nursing<br/> Zheng, Wu Yi; Black Dog Institute<br/> Debono, Deborah; University of Technology Sydney, School of Public Health, Faculty of Health<br/> Nguyen, A; Macquarie University, Centre for Health Systems and Safety Research, Australian Institute of Health Innovation; University of New South Wales, St Vincent's Clinical School<br/> Siette, Joyce; Macquarie University, Centre for Health Systems and Safety Research, Australian Institute of Health Innovation<br/> Seaman, Karla ; Macquarie University, Centre for Health Systems and Safety Research, Australian Institute of Health Innovation<br/> Miao, Melissa; University of Technology Sydney, Graduate School of</p> |

|                                 |                                                                                                                                                                                                                                                                                                                                                                                                                                                                                             |
|---------------------------------|---------------------------------------------------------------------------------------------------------------------------------------------------------------------------------------------------------------------------------------------------------------------------------------------------------------------------------------------------------------------------------------------------------------------------------------------------------------------------------------------|
|                                 | Health, Faculty of Health<br>Root, Jo; Consumers Health Forum of Australia<br>Roffe, David; IT Consultant<br>O'Toole, Libby; Aged Care Quality and Safety Commission<br>Carrasco, Marcela; Anglicare Sydney<br>Thompson, Alex; Anglicare Sydney<br>Shaikh, Javed; Anglicare Sydney<br>Wong, Jeffrey; Anglicare Sydney<br>Stanton, Cynthia; Sydney North Health Network<br>Haddock, Rebecca; Australian Healthcare and Hospitals Association,<br>Deeble Institute for Health Policy Research |
| <b>Primary Subject Heading</b>: | Health informatics                                                                                                                                                                                                                                                                                                                                                                                                                                                                          |
| Secondary Subject Heading:      | Evidence based practice, Geriatric medicine, Health services research                                                                                                                                                                                                                                                                                                                                                                                                                       |
| Keywords:                       | Health informatics < BIOTECHNOLOGY & BIOINFORMATICS, Information technology < BIOTECHNOLOGY & BIOINFORMATICS, Health & safety < HEALTH SERVICES ADMINISTRATION & MANAGEMENT, Quality in health care < HEALTH SERVICES ADMINISTRATION & MANAGEMENT, Risk management < HEALTH SERVICES ADMINISTRATION & MANAGEMENT, GERIATRIC MEDICINE                                                                                                                                                        |
|                                 |                                                                                                                                                                                                                                                                                                                                                                                                                                                                                             |

SCHOLARONE™  
Manuscripts

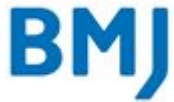

I, the Submitting Author has the right to grant and does grant on behalf of all authors of the Work (as defined in the below author licence), an exclusive licence and/or a non-exclusive licence for contributions from authors who are: i) UK Crown employees; ii) where BMJ has agreed a CC-BY licence shall apply, and/or iii) in accordance with the terms applicable for US Federal Government officers or employees acting as part of their official duties; on a worldwide, perpetual, irrevocable, royalty-free basis to BMJ Publishing Group Ltd ("BMJ") its licensees and where the relevant Journal is co-owned by BMJ to the co-owners of the Journal, to publish the Work in this journal and any other BMJ products and to exploit all rights, as set out in our [licence](#).

The Submitting Author accepts and understands that any supply made under these terms is made by BMJ to the Submitting Author unless you are acting as an employee on behalf of your employer or a postgraduate student of an affiliated institution which is paying any applicable article publishing charge ("APC") for Open Access articles. Where the Submitting Author wishes to make the Work available on an Open Access basis (and intends to pay the relevant APC), the terms of reuse of such Open Access shall be governed by a Creative Commons licence – details of these licences and which [Creative Commons](#) licence will apply to this Work are set out in our licence referred to above.

Other than as permitted in any relevant BMJ Author's Self Archiving Policies, I confirm this Work has not been accepted for publication elsewhere, is not being considered for publication elsewhere and does not duplicate material already published. I confirm all authors consent to publication of this Work and authorise the granting of this licence.

1  
2  
3 **Co-designing a dashboard of predictive analytics and decision support to drive care**  
4 **quality and client outcomes in aged care: A mixed-methods study protocol**  
5  
6  
7  
8  
9

10 Kristiana Ludlow\*<sup>1</sup>, Johanna Westbrook<sup>1</sup>, Mikaela Jorgensen<sup>1</sup>, Kimberly E. Lind<sup>2</sup>, Melissa  
11 Baysari<sup>3</sup>, Leonard C. Gray<sup>4</sup>, Richard Day<sup>5</sup>, Julie Ratcliffe<sup>6</sup>, Stephen R. Lord<sup>7,8</sup>, Andrew  
12 Georgiou<sup>1</sup>, Jeffrey Braithwaite<sup>9,10</sup>, Magdalena Z. Raban<sup>1</sup>, Jacqueline Close<sup>7</sup>, Elizabeth  
13 Beattie<sup>11</sup>, Wu Yi Zheng<sup>12</sup>, Deborah Debono<sup>13</sup>, Amy D. Nguyen<sup>1,5</sup>, Joyce Siette<sup>1</sup>, Karla  
14 Seaman<sup>1</sup>, Melissa Miao<sup>14</sup>, Jo Root<sup>15</sup>, David Roffe<sup>16</sup>, Libby O'Toole<sup>17</sup>, Marcela Carrasco<sup>18</sup>,  
15 Alex Thompson<sup>18</sup>, Javed Shaikh<sup>18</sup>, Jeffrey Wong<sup>18</sup>, Cynthia Stanton<sup>19</sup>, Rebecca Haddock<sup>20</sup>  
16  
17  
18  
19  
20  
21  
22  
23  
24  
25  
26  
27

28 <sup>1</sup> Centre for Health Systems and Safety Research, Australian Institute of Health Innovation,  
29 Macquarie University, Sydney, Australia  
30  
31

32 <sup>2</sup> Department of Health Promotion Sciences, Mel & Enid Zuckerman College of Public  
33 Health, The University of Arizona, Tucson, AZ, United States of America  
34  
35  
36

37 <sup>3</sup> Discipline of Biomedical Informatics and Digital Health, Charles Perkins Centre, Faculty of  
38 Medicine and Health, The University of Sydney  
39  
40  
41

42 <sup>4</sup> Centre for Health Services Research, University of Queensland, Brisbane, Australia  
43  
44

45 <sup>5</sup> St Vincent's Clinical School, University of New South Wales, Sydney, Australia  
46  
47

48 <sup>6</sup> College of Nursing and Health Sciences, Flinders University, Adelaide, Australia  
49  
50

51 <sup>7</sup> Neuroscience Research Australia, Sydney, Australia  
52

53 <sup>8</sup> School of Public health and Community Medicine, University of New South Wales,  
54 Sydney, Australia  
55  
56

57 <sup>9</sup> Centre for Healthcare Resilience and Implementation Science, Australian Institute of Health  
58 Innovation, Macquarie University, Sydney, Australia  
59  
60

1  
2  
3 <sup>10</sup> The International Society for Quality in Health Care, Dublin, Ireland  
4

5  
6 <sup>11</sup> School of Nursing, Queensland University of Technology, Brisbane, Australia  
7

8 <sup>12</sup> Black Dog Institute, Sydney, Australia  
9

10  
11 <sup>13</sup> School of Public Health, Faculty of Health, University of Technology Sydney, Sydney,  
12  
13 Australia  
14

15  
16 <sup>14</sup> Graduate School of Health, Faculty of Health, University of Technology Sydney, Sydney,  
17  
18 Australia  
19

20  
21 <sup>15</sup> Consumers Health Forum of Australia, Deakin, Australia  
22

23  
24 <sup>16</sup> IT consultant  
25

26  
27 <sup>17</sup> Aged Care Quality and Safety Commission, Sydney, Australia  
28

29  
30 <sup>18</sup> Anglicare, Sydney, Australia  
31

32  
33 <sup>19</sup> Sydney North Health Network, Sydney, Australia  
34

35  
36 <sup>20</sup> Deeble Institute for Health Policy Research, Australian Healthcare and Hospitals  
37  
38 Association, Canberra, Australia  
39

40  
41  
42 \* Corresponding author details:  
43

44 Address: Level 6, 75 Talavera Road, Macquarie University, NSW 2109, Australia; email:

45  
46 [kristiana.ludlow@mq.edu.au](mailto:kristiana.ludlow@mq.edu.au)  
47  
48  
49  
50

## 51 **KEYWORDS**

52  
53  
54 Health informatics; Information technology; Health & Safety; Quality in Health care; Risk  
55  
56 Management; Geriatric Medicine  
57  
58  
59  
60

1  
2  
3 Word count: 4,651  
4

5 **ABSTRACT**  
6

7  
8 **Introduction**  
9

10 There is a clear need for improved care quality and quality monitoring in aged care. Aged care  
11 providers collect an abundance of data, yet rarely are these data integrated and transformed in  
12 real-time into actionable information to support the provision of evidence-based care, nor  
13 shared with older people and their informal caregivers. This protocol describes the co-design  
14 and testing of a dashboard, for both residential and community-based aged care settings,  
15 comprising integrated information to provide an 'at-a-glance' overview of individuals  
16 receiving care, indicators to identify clients at risk of fall-related hospitalisations and poor  
17 quality of life, and evidence-based decision support to minimise these risks. Longer-term plans  
18 for dashboard implementation and evaluation are also outlined.  
19  
20  
21  
22  
23  
24  
25  
26  
27  
28  
29  
30

31 **Methods**  
32

33 This mixed-methods study will involve (i) co-designing dashboard features with users  
34 including aged care staff, clients, informal caregivers and general practitioners (GPs), (ii)  
35 integrating aged care data silos and developing risk models, and (iii) testing a dashboard  
36 prototype with users. The dashboard features will be informed by direct observations of routine  
37 work, interviews and focus groups with users, and a community forum. Multivariable discrete  
38 time survival models will be used to develop risk indicators, using predictors from linked  
39 historical aged care and hospital data. Dashboard prototype testing will comprise interviews,  
40 focus groups and walk-through scenarios using a think-aloud approach with staff members,  
41 clients and informal caregivers, and a GP workshop.  
42  
43  
44  
45  
46  
47  
48  
49  
50  
51  
52  
53

54 **Ethics and dissemination**  
55

56 This study has received ethical approval from the NSW Population & Health Services  
57  
58  
59  
60

1  
2  
3 Research Ethics Committee and Macquarie University's Human Research Ethics Committee.

4  
5 The findings of this research project will be presented to the aged care provider who will  
6  
7 share results with staff members, clients and their informal caregivers. Findings will also be  
8  
9 disseminated as peer-reviewed journal articles, policy briefs, conference presentations, and  
10  
11 discussions with policymakers and advocacy networks.  
12  
13  
14  
15  
16

### 17 **STRENGTHS AND LIMITATIONS OF THIS STUDY**

- 18  
19  
20 • The linkage of multiple data sources will allow for comprehensive information about aged  
21  
22 care clients' health conditions, psychosocial characteristics, care management,  
23  
24 hospitalisations, and quality of life.
- 25  
26  
27 • The dashboard's use of existing routinely collected data will enable the prediction of risk,  
28  
29 and provide evidence-based guidance, in real-time.
- 30  
31  
32 • To ensure that the dashboard is fit-for-purpose, the dashboard will be co-designed and  
33  
34 tested with intended users (staff, aged care clients, informal caregivers, general  
35  
36 practitioners).
- 37  
38  
39 • The dashboard will be designed to have generic characteristics which will allow it to be  
40  
41 embedded into existing aged care information technology to facilitate its transferability  
42  
43 and sustainability.
- 44  
45  
46 • Most aged care services in this study will be located in major cities, therefore, findings will  
47  
48 be limited in regional and remote areas, where client profiles and staff workflows could be  
49  
50 different.  
51  
52  
53  
54  
55  
56  
57  
58  
59  
60



## INTRODUCTION

Good quality care relies upon the availability of good quality data and real-time analytics to support decision-making. This is particularly the case for older people with complex health needs who are supported by a wide-range of people in different settings. Aged care services have not been well served by information systems that support everyday care provision. Internationally, there is consistent evidence that aged care systems are struggling to provide high quality services for older adults, with shortcomings highlighted by many recent reviews, reports and research.<sup>1-5</sup> The delivery of optimal care is hindered by a lack of integration between aged care and other healthcare services, fragmented funding systems, inadequate infrastructure, insufficient workforce training and support, and a widening gap between supply and demand of services.<sup>6</sup>

In Australia, concerns about suboptimal care and escalating pressure on aged care services has led to more than 40 major inquiries and reviews over the past 40 years,<sup>7</sup> the latest being the Royal Commission into Aged Care Quality and Safety (2018-20). The purpose of the Royal Commission is to examine the current state of the aged care system and determine what is needed to improve it for those receiving care now and into the future.<sup>1 8</sup> Interim findings have made it clear that the community is demanding better quality aged care and greater transparency: a system that meets older peoples' needs, identifies when they are at risk, and responds in effective and compassionate ways.<sup>1 9</sup>

Despite enormous amounts of data collected in the sector, there continues to be considerable problems for informal caregivers, providers, and governments to obtain meaningful information to allow the monitoring of care delivery and outcomes, and to guide effective decision-making.<sup>1</sup> The increasing use of electronic systems provides an opportunity to address some of these shortcomings. The World Health Organization's World Report on

1  
2  
3 Ageing and Health identified information and communication technologies (ICT) as a  
4  
5 “critical tool for transforming health systems and services to deliver person-centred and  
6  
7 integrated care that is appropriate to older people”.<sup>6(p. 109)</sup> The report outlines some of the  
8  
9 anticipated and demonstrated benefits of utilising ICT in terms of access to services, quality  
10  
11 and safety of care, cost effectiveness of services, accessibility of information and knowledge,  
12  
13 social care and connectedness, and the provision of evidence-based care.<sup>6</sup>  
14  
15  
16  
17  
18  
19

### 20 **Data rich but information poor**

21  
22 While the last decade has seen substantial uptake of ICT by aged care sectors  
23  
24 internationally,<sup>10</sup> the potential of these systems to transform care quality by increasing the  
25  
26 usability and transparency of aged care information remains largely unrealised.<sup>10</sup> Health and  
27  
28 aged care systems are often characterised as ‘*data rich but information poor*’,<sup>11 12</sup> meaning  
29  
30 that although providers collect vast amounts of clinical and care management data, these data  
31  
32 frequently exist within silos that are rarely integrated to create meaningful information or  
33  
34 knowledge to support care staff to coordinate, monitor and enhance care delivery. In  
35  
36 Australia, these information silos are often driven by variations in funding and ownership of  
37  
38 data (e.g., between aged care and healthcare, or between State and Federal governments).  
39  
40 Furthermore, these data are not often shared with the people who are the subject of data  
41  
42 collection (i.e., those receiving services and their informal caregivers) or with the general  
43  
44 public who largely fund aged care services through tax contributions.  
45  
46  
47  
48  
49

50 Data have traditionally been used for reporting purposes rather than quality  
51  
52 improvement activities or driving care processes. Several countries have mandated systems  
53  
54 for collecting and reporting aged care information,<sup>13</sup> for example, the Home Care Reporting  
55  
56 System and Continuing Care Reporting System in Canada, the United States’ MDS 3.0 and  
57  
58 Nursing Home Compare, Sweden’s Open Comparisons national quality monitoring system,  
59  
60

1  
2  
3 and the International Resident Assessment Instrument Long-Term Care Facility (interRAI-  
4 LTCF) Assessment System in New Zealand. Australia's aged care system lags behind other  
5  
6 Organisation for Economic Co-operation and Development (OECD) countries in terms of  
7  
8 measuring and reporting on aged care quality.<sup>14</sup> For example, Australia's National Aged Care  
9  
10 Mandatory Quality Indicator Program,<sup>15</sup> operating since 2019, collects information on three  
11  
12 quality indicators (physical restraint use, pressure ulcers and weight loss) in residential aged  
13  
14 care settings (also known as assisted living facilities, nursing homes, long-term care facilities,  
15  
16 and skilled nursing facilities). The aggregated data that are publicly reported for this program  
17  
18 allow comparisons to be made between providers at this time. Additional quality indicators  
19  
20 for falls and major injury, and medication management are being introduced to the program  
21  
22 in 2021. Currently, there is no system for mandatory reporting of quality indicators in  
23  
24 community aged care settings (i.e., formal aged care services provided in the home and  
25  
26 community). Limited and disparate information on the quality of aged care in Australia  
27  
28 reduces the capacity for older adults and their caregivers to make informed decisions about  
29  
30 their care. Without this information, providers are limited in their ability to monitor and  
31  
32 benchmark key quality indicators across services, initiate improvement activities, and  
33  
34 systematically and iteratively assess the effectiveness and cost-effectiveness of services and  
35  
36 interventions.  
37  
38  
39  
40  
41  
42  
43  
44  
45  
46  
47

### 48 **Predictive risk models**

49  
50 Very little attention has been placed on the power of new analytic models to exploit the  
51  
52 increasing volume of data that are stored in aged care IT systems. Initial research to capitalise  
53  
54 on this valuable information source has focused on retrospective and descriptive analyses.<sup>16 17</sup>  
55  
56 This foundational research has demonstrated the potential value of these data to better  
57  
58 understand quality of care issues.<sup>18-20</sup> Further, this work has shown that it is possible to create  
59  
60

1  
2  
3 automated risk-adjusted indicators of client care and outcomes by linking existing  
4  
5 administrative, clinical and care management datasets routinely collected by providers.<sup>21 22</sup> A  
6  
7 number of studies in the acute care sector have shown the possibilities of leveraging  
8  
9 electronic data systems to implement real-time predictive risk models.<sup>23-26</sup> These models have  
10  
11 been used to identify clients who are at risk of adverse events earlier and facilitate the uptake  
12  
13 of tailored evidence-based strategies by time-poor staff.<sup>27-30</sup>  
14  
15  
16  
17  
18  
19

## 20 **Dashboards**

21  
22 Dashboards offer promise in integrating multiple data sources and supporting the use of  
23  
24 predictive analytics to improve client care. They allow for a single-view summary of an  
25  
26 individual's information and can provide decision-related information using text and visual  
27  
28 features. These summaries can be dynamic, reflecting changes in clinical environments and a  
29  
30 person's information in real-time. Dashboards typically utilise graphical information displays  
31  
32 and colour, allowing users to easily interact with and explore important information.  
33  
34  
35

36 Dashboards may include features that alert users to areas requiring attention, such as  
37  
38 deteriorating patients or those at high risk of injury or harm and provide support tools to  
39  
40 guide staff members' responses to alerts. These features allow for the quick and targeted  
41  
42 communication of information, helping reduce the cognitive effort of the user and enabling  
43  
44 them to make informed decisions effectively and efficiently (Figure 1).  
45  
46  
47  
48  
49

50  
51 **<Insert Figure 1 here>**  
52  
53  
54  
55

56 Dashboards have predominantly been implemented and evaluated in primary, acute  
57  
58 and mental health care.<sup>31-33</sup> In these settings, dashboards have been shown to improve  
59  
60

1  
2  
3 clinician situational awareness, decision-making, and guideline adherence, positively  
4 affecting outcomes such as mortality.<sup>31 34</sup> At an organisational-level, dashboards can improve  
5 the detection of overdue tasks, procedural bottlenecks, and support better resource  
6 allocation.<sup>34</sup> At the client-level, they have the potential to make meaningful information  
7 accessible to clients and their families, placing individuals at the centre of their own  
8 information and care. Dashboards are less commonly used in aged care settings, and this  
9 setting may encounter specific challenges with uptake and use due to poor ICT infrastructure  
10 and support services, and a workforce with lower computer experience and digital literacy  
11 skills than found in acute care settings.<sup>35 36</sup>  
12  
13  
14  
15  
16  
17  
18  
19  
20  
21  
22  
23  
24  
25  
26

## 27 **Rationale**

28  
29 Anglicare, a large non-profit aged care provider located in New South Wales (NSW),  
30 Australia, identified the critical need for leveraging their electronic systems to support  
31 evidence-based practice across their services. The Australian Institute of Health Innovation,  
32 Macquarie University, is partnering with Anglicare; the Sydney North Health Network  
33 (SNHN); the Northern Sydney Local Health District (NSLHD); the Deeble Institute for  
34 Health Policy Research, Australian Healthcare and Hospitals Association (AHHA); and the  
35 Australian Aged Care Quality and Safety Commission, to design, develop, implement and  
36 evaluate an interactive dashboard comprising integrated client information, risk indicators  
37 and decision support. This dashboard is intended to be used by Anglicare staff (e.g.,  
38 registered nurses, care workers, care advisors, managers), clients, informal caregivers, and  
39 general practitioners (GPs) providing services to Anglicare clients, collectively referred to as  
40 'users'. It is expected that the dashboard will be used to identify and support older adults at  
41 risk of poor outcomes in residential aged care facilities and community-based aged care. The  
42 dashboard will be iteratively co-designed and evaluated with stakeholders to (i) allow care  
43  
44  
45  
46  
47  
48  
49  
50  
51  
52  
53  
54  
55  
56  
57  
58  
59  
60

1  
2  
3 managers to monitor robust real-time indicators of care quality, (ii) support staff members  
4  
5 and GPs to obtain a client overview ‘at-a-glance’ and make evidence-based decisions about  
6  
7 their care, and (iii) provide timely, meaningful information to older persons and their  
8  
9 families.  
10

### 11 12 *Priority aged care challenges*

13  
14 Risk indicators will initially target two priority aged care challenges relevant to both  
15  
16 residential- and community-based care populations: (i) hospital-related falls; and (ii) Quality  
17  
18 of Life (QoL).  
19  
20

- 21  
22
- 23 (i) Falls are a major cause of harm to older Australians, experienced by more than a  
24  
25 third of adults aged  $\geq 65$  every year.<sup>37</sup> In 2014-15 in Australia, over 1.4 million  
26  
27 hospital days were attributable to fall-related injuries among older adults,<sup>38</sup>  
28  
29 costing >\$500 million AUD.<sup>39</sup> Falls are the cause of 92% of injury  
30  
31 hospitalisations among aged care residents.<sup>40</sup> Identifying those at risk is the  
32  
33 starting point to improve falls management. However, falls risk tools currently in  
34  
35 use are stand-alone assessments that are rarely integrated with dynamic  
36  
37 information about an individual’s risk, such as changes in medications or health  
38  
39 following a hospitalisation.<sup>41</sup>  
40  
41
  - 42 (ii) QoL has been recognised by international peak health and healthcare  
43  
44 organisations as an important aspect of active ageing and quality care in long-term  
45  
46 care settings.<sup>6 42 43</sup> Older Australians report QoL as a central goal for aged care.<sup>44</sup>  
47  
48 While research on the relationships between QoL and clinical outcomes in aged  
49  
50 care settings is sparse, some evidence suggests that lower QoL scores are  
51  
52 associated with poorer clinical outcomes in residential aged care clients.<sup>45-47</sup>  
53  
54 Alongside the increased recognition of the importance of QoL for older adults,  
55  
56 valid and reliable QoL tools have recently been developed, including those  
57  
58  
59  
60

1  
2  
3 suitable for use by people with dementia.<sup>45 48-53</sup> Currently, reporting on QoL in  
4  
5 Australian aged care is not mandatory, and while recent national policy requires  
6  
7 community care providers to report on client wellness,<sup>54</sup> relatively little is known  
8  
9 about modifiable factors contributing to QoL in aged care.  
10  
11

12  
13 These two exemplar indicators will serve as an initial model to test embedding risk  
14  
15 indicators in an electronic dashboard within aged care settings. Other indicators may be  
16  
17 added during the study in response to feedback from users.  
18  
19

### 20 21 22 **Study aim**

23  
24 The aim of this study is to describe the co-design and testing of a dashboard in residential and  
25  
26 community-based aged care settings, and to outline longer-term plans for dashboard  
27  
28 implementation and evaluation.  
29  
30

## 31 32 33 **METHODS AND ANALYSIS**

### 34 35 36 **Study design**

37  
38 The research comprises three components: 1. Co-design of the digital dashboard with users;  
39  
40  
41 2. Integration of data sources and development of risk models; and 3. Dashboard prototype  
42  
43 testing with users. The processes and data sources for each component are summarised in  
44  
45 Figure 2. The study gained ethics approval in December 2019, with data collection  
46  
47 commencing April 2020.  
48  
49

50  
51  
52  
53  
54 **<Insert figure 2 here>**  
55  
56

### 57 58 59 60 ***Co-design principles***

1  
2  
3 Co-design is a methodology used to design and deliver interventions which take account of  
4 contextual factors, facilitate ownership of interventions, and motivate uptake and user  
5 satisfaction.<sup>31 36</sup> It is an approach that seeks out the meaningful involvement of potential user  
6 groups in designing tools and interventions, drawing on their lived experiences to ensure that  
7 outputs are tailored to their expressed needs and preferences, and align with workflows and  
8 available resources. Our research processes and methodology choices are guided by the  
9 following co-design principles outlined by Blomkamp,<sup>55</sup> adapted from New South Wales  
10 Council of Social Services<sup>56</sup>: Outcomes-focused, inclusive, participative, respectful, and  
11 adaptive. The overarching goal of our research is to achieve positive change in aged care by  
12 improving outcomes for older adults. We plan to involve a range of participants in the design  
13 process and will be seeking out their unique knowledge, opinions, and experiences. We  
14 acknowledge that each user group has equal standing and are experts in their own right. Our  
15 study will involve users at different stages throughout the co-design process to ensure that the  
16 dashboard is appropriate, useful, and relevant. Participants' input will be sought throughout  
17 an iterative process to help refine the dashboard.

### 40 **Study population**

41  
42 Anglicare provides a variety of support services across the life span, including aged care,  
43 mental health services, palliative care, and family support. This study involves Anglicare's 23  
44 residential aged care facilities, and their community-based aged care service outlets which  
45 provide services to older people in their homes. The risk modelling and data integration  
46 component of this study will include data about all of Anglicare's residential and community  
47 care clients over the previous five years (1 July 2014 - 31 December 2019, n=14,800). The  
48 co-design and prototype testing components will involve samples drawn from Anglicare staff  
49 members (registered nurses, care workers, care managers), clients, informal caregivers and  
50  
51  
52  
53  
54  
55  
56  
57  
58  
59  
60



1  
2  
3 GPs. These groups represent the anticipated users of the dashboard, and are the people most  
4 likely to access client information and make decisions about care. Anglicare staff members  
5  
6 likely to access client information and make decisions about care. Anglicare staff members  
7  
8 will be recruited during management meetings and via emails from executive Anglicare staff,  
9  
10 where information about the study and participation requirements are presented. Information  
11  
12 of interested staff members will be provided to researchers for follow-up for focus groups.  
13  
14 Clients and informal caregivers who meet the following inclusion criteria: currently receiving  
15  
16 Anglicare residential or community care services, or their informal caregiver; ability to  
17  
18 participate in an English-language interview; and ability to provide informed consent, will be  
19  
20 invited to participate in the study. Clients will be provided with information and consent  
21  
22 sheets by members of Anglicare staff. Those who are interested in participating in the study  
23  
24 will be asked if they consent to their contact details being shared with the research team, who  
25  
26 will then contact them to provide more information about the study, answer any questions  
27  
28 and schedule an interview time if appropriate. General practitioners will be recruited via the  
29  
30 Sydney North PHN networks through email or flyers. All participants will be required to  
31  
32 provided written of verbal consent before engaging in the study.  
33  
34  
35  
36  
37  
38  
39  
40

## 41 **Methods and analysis**

### 42 ***Component 1: Co-design of the digital dashboard with users***

43  
44  
45 The design of the dashboard will draw on existing literature in human factors design and  
46  
47 evaluation, evidence of features of effective dashboards, and input from users, guided by co-  
48  
49 design principles. A multi-method approach will be taken to investigate users' needs and  
50  
51 preferences, design the dashboard and to examine how the dashboard could be integrated into  
52  
53 everyday practices. This will include:  
54  
55

- 56  
57 • Direct observations of staff members' routine work interactions including type, location  
58  
59 and duration of activities. Observations will be conducted unobtrusively (e.g., at a  
60

1  
2  
3 distance of approximately 3 metres) using a validated time and motion tool (e.g., Work  
4  
5 Observation Method By Activity Timing.<sup>57 58</sup>  
6  
7

- 8 • Interviews and focus groups with staff members about the design of the dashboard,  
9 including their perspectives on core information to be included in the dashboard,  
10 dashboard features (e.g., presentation of information and inclusion of decision support  
11 tools). They will also be asked about how decision-making guidance for the target  
12 priority areas (hospital-related falls and QoL) could be of value, and work processes or  
13 challenges garnered from the direct observations.  
14  
15
- 16 • Interviews and focus groups with aged care clients and informal caregivers to explore  
17 their preferences and experiences relating to access to medical and aged care  
18 information, involvement in decision-making, and use of technology. The interviews  
19 will also focus on design features of the dashboard including functions (what clients  
20 would like the dashboard to do, and how), appearance (e.g., colours, fonts, layout), and  
21 information to be included in the dashboard.  
22  
23
- 24 • Interviews with GPs focusing on how the dashboard could support improved  
25 communication between aged care and primary care. This will include, for example,  
26 discussion of current processes and difficulties experienced in the transfer of  
27 information between aged care facilities and GP practice records. Exploration of GP  
28 use of decision support tools will also occur.  
29  
30
- 31 • Co-design groups with users (staff members, GPs, clients and informal caregivers) to  
32 design and develop the decision support for the risk indicators will be established. The  
33 decision support will comprise evidence-based information on actions to be taken when  
34 clients are identified as at risk.  
35  
36  
37  
38  
39  
40  
41  
42  
43  
44  
45  
46  
47  
48  
49  
50  
51  
52  
53  
54  
55

### 56 *Analysis*

57 Interviews, focus groups and working groups will be audio recorded and transcribed verbatim.  
58  
59  
60

1  
2  
3 Qualitative data from the focus groups, interviews and workshop will be analysed using a  
4 structured content analysis approach.<sup>59 60</sup> This approach allows for major domains and themes  
5 from participant responses to be categorised in order to understand participant needs and  
6 preferences related to dashboard appearance and functionality. A critical realist approach, as  
7 described by Pawson and Tilley,<sup>61</sup> will be applied. This a structured method for examining not  
8 only whether an intervention works, but also for whom and under what circumstances  
9 interventions work. Understanding the actors and drivers underlying appropriate utilisation of  
10 the dashboard will provide insight into what is required to tailor the dashboard for each user to  
11 ensure effectiveness within their work practices. The influence of subjectivity and the social  
12 context on data collection and analysis will be acknowledged. Data analysis will be conducted  
13 in NVivo version 12, a program that will support categorising of the qualitative data into  
14 domains and themes.<sup>62</sup> Two researchers will perform the initial coding of these data, producing  
15 a list of codes which will then be reviewed by the research team. Any discrepancies in coding  
16 will be discussed and used to modify the list of codes until the research team agrees on code  
17 application. The codes will then be sorted into preliminary domains and themes, which will be  
18 repeatedly reviewed and refined to maximise homogeneity prior to developing an analytic  
19 narrative. Data from the observation sessions will be descriptively analysed for time spent on  
20 different activities, interactions with people, tools and other methods used to complete tasks,  
21 and rate of interruptions.

### 22 *Refinement of prototypes*

23  
24 The findings from the co-design activities will be used to create mock-ups of the dashboard  
25 prototypes that will be presented to staff members, clients and informal caregivers during focus  
26 groups and a community forum, as well as GPs during a working group. As the dashboard is  
27 intended for different users, the presentation of information, dashboard features and evidence-  
28 based decision support will be tailored towards each user group and therefore, mock-ups will  
29  
30

1  
2  
3 be user-specific. Users' feedback will provide insights into their perspectives of the prototype  
4 design, functionality and modifications needed, and guide revisions to the dashboard prototype.  
5  
6 The qualitative data obtained through prototype feedback sessions will be analysed using the  
7  
8 same strategies outlined above.  
9  
10  
11  
12  
13  
14

### 15 ***Component 2: Integration of data sources and development of risk models***

16  
17  
18 Building upon the feedback from users in component 1, we will develop a list of information  
19 items that will be used to populate the dashboard, based on the data available from Anglicare  
20 sources (Table 1). Two exemplar risk models, one for each priority area, will be developed  
21 through the linkage of available historical Anglicare client records with data from the NSW  
22 Emergency Department Data Collection (EDDC), the NSW Admitted Patient Data Collection  
23 (APDC) and the NSW Registry of Births, Deaths and Marriages (RBDM) registries (see Table  
24 1 for descriptions of data sources). Data will be extracted for all Anglicare's residential and  
25 community care clients over the previous 5 years. Hospital data for these clients will be  
26 requested from the data custodians of the NSW EDDC, the NSW APDC and the NSW RBDM  
27 death registrations. The Centre for Health Record Linkage (CHeReL) will conduct the data  
28 linkage in order to allow preservation of individual confidentiality as data custodians supply  
29 only personal identifiers to CHeReL without clinical data. Only clinical data without personal  
30 identifiers will be supplied to researchers.  
31  
32  
33  
34  
35  
36  
37  
38  
39  
40  
41  
42  
43  
44  
45  
46  
47

48 Candidate variables to be evaluated as predictors will be based on existing literature  
49 and the extracted data from Anglicare client records (see Table 1). Multivariable discrete time  
50 survival (DTS) modelling will be used.<sup>63 64</sup> A rounded score for each risk factor in the final  
51 model will be calculated by dividing the regression coefficient of each covariate by the lowest  
52 coefficient in the model. This allows for total risk scores to be calculated for each person by  
53 summing the scores for each present risk factor. Risk models will be internally validated using  
54  
55  
56  
57  
58  
59  
60

bootstrap resampling. We have presented the approach to DTS modelling, however other modelling will be explored to ensure the most appropriate method is used. STATA will be used to conduct the statistical analysis.

**Table 1: Data sources for project component 1 risk models**

| <b>Data source</b>       | <b>Description</b>                                                                                                                                                                                                                                                                                                    |
|--------------------------|-----------------------------------------------------------------------------------------------------------------------------------------------------------------------------------------------------------------------------------------------------------------------------------------------------------------------|
| Aged care client records | This electronic health and care management information system includes client demographic information, clinical data, client needs data, service and activity data, medications administered, social factors, and QoL measures.                                                                                       |
| EDDC                     | This collection provides information about patient presentations to the emergency departments of public hospitals in NSW, such as admission and separation dates, mode of separation, referral source, triage category and diagnoses.                                                                                 |
| APDC                     | This collection records all admitted patient services provided by NSW public hospitals, public psychiatric hospitals, public multi-purpose services, private hospitals, and private day procedures centres. Data includes admission and separation dates, demographics, mode of separation, diagnosis and procedures. |
| RBDM registrations       | This dataset contains date and cause of death information for deaths occurring in NSW.                                                                                                                                                                                                                                |

NSW=New South Wales; EDDC= NSW Emergency Department Data Collection; APDC= Admitted Patient Data Collection; RBDM=Registry of Births, Deaths and Marriages registries

### ***Component 3: Dashboard prototype testing***

Informed by the findings from component 1, and the outputs of component 2, user-specific prototypes of the dashboard will be created by a specialist IT programmer and Anglicare IT staff using and adapting modifiable modules within Anglicare's existing infrastructure. Client health and care information, along with the risk models, will be integrated into the dashboard to a) provide an overview of clients' information (e.g., current medications) and b) alert users to changes in clients' risk levels for the two priority risk indicators in real-time. Each indicator will be accompanied by evidence-based decision guidance to direct actions in response the level of risk identified.

To test the dashboard prototype, staff members will be guided through task-based scenario 'walk-throughs' with a think-aloud approach.<sup>65</sup> Subsequent follow-up interviews or focus groups will be conducted to explore staff members' perceptions of the dashboard and alignment with workflow. Clients and informal caregivers will also engage in scenario walk-throughs, along with follow-up interviews or focus groups to elicit their views on their use of the dashboard. Qualitative data from the think-aloud activity and interviews will be analysed using the same methods as Component 2. The prototype testing phase will inform refinements of the dashboard, driven by users' feedback.

### **Longer-term plans for dashboard implementation and evaluation**

While the wide-spread implementation and evaluation of the dashboard are not the focus of this protocol, a broad overview of an anticipated large-scale trial to investigate the scalability and effectiveness is outlined below. Once the dashboard has been revised in line with the findings from prototype testing, a hybrid stepped-wedge cluster randomised controlled trial will be carried out. This will involve implementing the dashboard in 12 Anglicare residential facilities and 12 community care units, with two residential aged care facilities and two

1  
2  
3 community care units randomly selected for dashboard implementation each month for six  
4 months. The remaining facilities and community units will continue with usual care until the  
5 end of the trial. Implementation processes will utilise Anglicare's staff training mechanisms  
6 and provide workshops for staff and clients/informal caregivers on dashboard purpose and use,  
7 using practical examples and incorporating behaviour change principles to support both  
8 intervention fidelity and effectiveness. As part of the randomised controlled trial, process  
9 evaluation will be conducted to identify barriers and facilitators to dashboard use, and  
10 economic evaluations to assess resource use and costs associated with the development and  
11 implementation of the dashboard will be undertaken.  
12  
13  
14  
15  
16  
17  
18  
19  
20  
21  
22  
23

24 It is anticipated that the dashboard will serve as a model for both Australian and  
25 international aged care organisations wanting to integrate siloed data and use informatics to  
26 facilitate real-time quality monitoring and management of client outcomes. Lessons learned  
27 from this project may be applied more broadly to the co-design of interventions with users, as  
28 well as the utilisation of data and IT systems in aged care settings.  
29  
30  
31  
32  
33  
34  
35  
36  
37  
38

### 39 **Patient and public involvement**

40  
41 This research centres on the philosophy that users are *co-creators* of the research rather than  
42 *participants* in the research.<sup>66 67</sup> The project proposal was co-designed from inception with key  
43 Anglicare staff in a series of workshops starting in December 2017. In order to ensure that the  
44 research will have meaningful and real-world applications, users (staff, aged care clients,  
45 informal caregivers, and GPs) will continue to have strong engagement across the various  
46 stages of the research.<sup>66</sup> We aim to elicit users' expert knowledge, preferences and experiences  
47 through a range of methods, namely, interviews, observations, focus groups, workshops and  
48 forums. This information will be used to guide development of the dashboard, facilitate its  
49 implementation, and inform future evaluations of the intervention. Relevant stakeholders  
50  
51  
52  
53  
54  
55  
56  
57  
58  
59  
60

1  
2  
3 including Anglicare representatives and users will be included in publications arising from this  
4  
5 research to ensure appropriate interpretation of findings.<sup>66</sup>  
6  
7  
8  
9

## 10 **ETHICS AND DISSEMINATION**

11  
12  
13 This study has received ethical approval from the NSW Population & Health Services  
14  
15 Research Ethics Committee (Ref: 2020/ETH00166) and the Macquarie University Human  
16  
17 Research Ethics Committee (Ref: 6144). Data will be managed and stored in line with  
18  
19 Macquarie University policies. The findings of this research project will be disseminated as  
20  
21 peer-reviewed journal articles and as presentations at national and international conferences,  
22  
23 seminars and workshops. The Deeble Institute for Health Policy Research, AHHA, will play  
24  
25 a valuable role to support policy translation using their extensive advocacy networks across  
26  
27 health policy portfolios. Research findings will be disseminated through policy briefs and  
28  
29 regular meetings with parliamentary staff and policy-makers. Findings will be relayed back to  
30  
31 Anglicare to inform decisions, and their networks will be used to present findings to clients  
32  
33 and their informal caregivers in newsletters.  
34  
35  
36  
37  
38  
39  
40  
41  
42  
43  
44

## 45 **LIST OF ABBREVIATIONS**

46 **AUD** Australian dollars

47  
48 **APDC** Admitted Patient Data Collection

49  
50 **CHeReL** Centre for Health Record Linkage

51  
52 **EDDC** Emergency Department Data Collection

53  
54 **GP** General Practitioners

55  
56 **ICT** Information and communication technologies  
57  
58  
59  
60



1  
2  
3 **NSLHD** Northern Sydney Local Health District  
4

5 **NHMRC** National Health and Medical Research Council  
6  
7

8 **NSW** New South Wales  
9

10 **QoL** Quality of Life  
11  
12

13 **RBDM** Registry of Births, Deaths and Marriages  
14  
15

16 **SNPHN** Sydney North Primary Health Network  
17  
18

19 **SW-CRCT** Stepped-wedge cluster randomised controlled trial  
20  
21  
22

## 23 24 **REFERENCES**

- 25  
26  
27 1. Royal Commission into Aged Care Quality and Safety. Interim Report: Neglect. Adelaide,  
28 Australia: Commonwealth of Australia, 2019.  
29  
30 2. Age UK. Briefing: Health and Care of Older People in England 2019. London, UK: Age  
31 UK, 2019.  
32  
33 3. European Social Policy Network (ESPN). Challenges in Long-term Care in Europe: A  
34 Study of National Policies. Brussels, BE: European Commission, 2018.  
35  
36 4. Organisation for Economic Co-operation and Development. Ageing and long-term care.  
37 Health at a Glance 2019: OECD Indicators. Paris, France: OECD 2019:217-39.  
38  
39 5. Ludlow K, Churrua K, Mumford V, et al. Unfinished care in residential aged care  
40 facilities: an integrative review. *The Gerontologist* 2019:gzn145. doi:  
41 10.1093/geront/gnz145  
42  
43 6. World Health Organization. World Report on Ageing and Health. Geneva, Switzerland:  
44 WHO, 2015.  
45  
46 7. Royal Commission into Aged Care Quality and Safety. A History of Aged Care Reviews.  
47 Adelaide, Australia: Commonwealth of Australia, 2020.  
48  
49  
50  
51  
52  
53  
54  
55  
56  
57  
58  
59  
60

- 1  
2  
3 8. Royal Commission into Aged Care Quality and Safety. Home page 2020 [Available from:  
4  
5 <https://agedcare.royalcommission.gov.au/Pages/default.aspx>.  
6  
7
- 8 9. Royal Commission into Aged Care Quality and Safety. Australia's Aged Care System:  
9  
10 Assessing the Views And Preferences of the General Public for Quality of Care and  
11  
12 Future Funding. Adelaide, Australia: Commonwealth of Australia, 2020.  
13  
14
- 15 10. An international comparison of technology utilization in an aged care setting. Information  
16  
17 Technology in Aged Care; 2017 20-22 November; Gold Coast, Australia.  
18
- 19 11. Forte P. Data rich, information poor: Data, information and decision support in the NHS.  
20  
21 *European Journal of Information Systems* 1994;3(2):148-54. doi:  
22  
23 10.1057/ejis.1994.15  
24  
25
- 26 12. Data Rich – But Information Poor. 18th Working Conference on Virtual Enterprises  
27  
28 (PROVE); 2017 18-20 September; Vicenza, Italy. Springer International Publishing.  
29  
30
- 31 13. Royal Commission into Aged Care Quality and Safety. International and National Quality  
32  
33 and Safety Indicators for Aged Care. Adelaide, Australia: Commonwealth of  
34  
35 Australia, 2020.  
36  
37
- 38 14. Royal Commission into Aged Care Quality and Safety. Australia far behind in monitoring  
39  
40 aged care quality Adelaide, Australia: Royal Commission into Aged Care Quality and  
41  
42 Safety; 2020 [Available from: [https://agedcare.royalcommission.gov.au/news-and-](https://agedcare.royalcommission.gov.au/news-and-media/australia-far-behind-monitoring-aged-care-quality)  
43  
44 [media/australia-far-behind-monitoring-aged-care-quality](https://agedcare.royalcommission.gov.au/news-and-media/australia-far-behind-monitoring-aged-care-quality).  
45  
46
- 47 15. Australian Government. Department of Health. National Aged Care Mandatory Quality  
48  
49 Indicator Program Canberra, Australia: Commonwealth of Australia; 2020 [Available  
50  
51 from: [https://www.health.gov.au/initiatives-and-programs/national-aged-care-](https://www.health.gov.au/initiatives-and-programs/national-aged-care-mandatory-quality-indicator-program)  
52  
53 [mandatory-quality-indicator-program](https://www.health.gov.au/initiatives-and-programs/national-aged-care-mandatory-quality-indicator-program).  
54  
55
- 56 16. van Weel JM, Renehan E, Ervin KE, et al. Home care service utilisation by people with  
57  
58 dementia-A retrospective cohort study of community nursing data in Australia. *Health*  
59  
60

- 1  
2  
3 & *Social Care in the Community* 2019;27(3):665-75. doi: 10.1111/hsc.12683  
4  
5 [published Online First: 2018/11/14]  
6  
7  
8 17. Lind KE, Raban MZ, Brett L, et al. Measuring the prevalence of 60 health conditions in  
9  
10 older Australians in residential aged care with electronic health records: A  
11  
12 retrospective dynamic cohort study. *Population Health Metrics* 2020;18(1):25. doi:  
13  
14 10.1186/s12963-020-00234-z  
15  
16  
17 18. Lind KE, Raban MZ, Georgiou A, et al. NSAID use among residents in 68 residential  
18  
19 aged care facilities 2014 to 2017: An analysis of duration, concomitant medication  
20  
21 use, and high-risk conditions. *Pharmacoepidemiology and Drug Safety*  
22  
23 2019;28(11):1480-88. doi: 10.1002/pds.4866 [published Online First: 2019/08/08]  
24  
25  
26 19. Raban MZ, Lind KE, Day RO, et al. Trends, determinants and differences in antibiotic  
27  
28 use in 68 residential aged care homes in Australia, 2014-2017: A longitudinal analysis  
29  
30 of electronic health record data. *BMC Health Services Research* 2020;20(1):883. doi:  
31  
32 10.1186/s12913-020-05723-3 [published Online First: 2020/09/20]  
33  
34  
35 20. Lind KE, Raban MZ, Georgiou A, et al. Duration of antipsychotic medication use by aged  
36  
37 care facility residents with dementia. *Alzheimer Disease & Associated Disorders*  
38  
39 2019;33(4):331-38. doi: 10.1097/wad.0000000000000336 [published Online First:  
40  
41 2019/07/26]  
42  
43  
44 21. Pont LG, Raban MZ, Jorgensen ML, et al. Leveraging new information technology to  
45  
46 monitor medicine use in 71 residential aged care facilities: Variation in polypharmacy  
47  
48 and antipsychotic use. *International Journal for Quality in Health Care*  
49  
50 2018;30(10):810-16. doi: 10.1093/intqhc/mzy098  
51  
52  
53 22. Jorgensen M, Siette J, Georgiou A, et al. Longitudinal variation in pressure injury  
54  
55 incidence among long-term aged care facilities. *International Journal for Quality in*  
56  
57 *Health Care* 2018:mzy087-mzy87. doi: 10.1093/intqhc/mzy087  
58  
59  
60

- 1  
2  
3 23. Parikh RB, Kakad M, Bates DW. Integrating predictive analytics into high-value care:  
4  
5 The dawn of precision delivery. *Journal of the American Medical Association*  
6  
7 2016;315(7):651-52. doi: 10.1001/jama.2015.19417  
8  
9
- 10 24. Mahmoudi E, Kamdar N, Kim N, et al. Use of electronic medical records in development  
11  
12 and validation of risk prediction models of hospital readmission: Systematic review.  
13  
14 *BMJ* 2020;369:m958. doi: 10.1136/bmj.m958  
15  
16
- 17 25. Goldstein BA, Navar AM, Pencina MJ, et al. Opportunities and challenges in developing  
18  
19 risk prediction models with electronic health records data: A systematic review.  
20  
21 *Journal of the American Medical Informatics Association* 2017;24(1):198-208. doi:  
22  
23 10.1093/jamia/ocw042 [published Online First: 2016/05/18]  
24  
25
- 26 26. Classen D, Li M, Miller S, et al. An electronic health record-based real-time analytics  
27  
28 program for patient safety surveillance and improvement. *Health Affairs*  
29  
30 2018;37(11):1805-12. doi: 10.1377/hlthaff.2018.0728  
31  
32
- 33 27. Dey M, Rautaray SS. Study and analysis of data mining algorithms for healthcare  
34  
35 decision support system. *International Journal of Computer Science and Information*  
36  
37 *Technologies* 2014;5(1):470-77.  
38  
39
- 40 28. Wang Y, Kung L, Byrd TA. Big data analytics: Understanding its capabilities and  
41  
42 potential benefits for healthcare organizations. *Technological Forecasting and Social*  
43  
44 *Change* 2018;126:3-13. doi: 10.1016/j.techfore.2015.12.019  
45  
46
- 47 29. Kwan JL, Lo L, Ferguson J, et al. Computerised clinical decision support systems and  
48  
49 absolute improvements in care: Meta-analysis of controlled clinical trials. *BMJ*  
50  
51 2020;370:m3216. doi: 10.1136/bmj.m3216  
52  
53
- 54 30. Gilbert T, Neuburger J, Kraindler J, et al. Development and validation of a Hospital  
55  
56 Frailty Risk Score focusing on older people in acute care settings using electronic  
57  
58  
59  
60

- 1  
2  
3 hospital records: an observational study. *The Lancet* 2018;391(10132):1775-82. doi:  
4  
5 10.1016/S0140-6736(18)30668-8  
6  
7
- 8 31. Dowding D, Randell R, Gardner P, et al. Dashboards for improving patient care: Review  
9  
10 of the literature. *International Journal of Medical Informatics* 2015;84(2):87-100. doi:  
11  
12 10.1016/j.ijmedinf.2014.10.001  
13  
14
- 15 32. Khairat SS, Dukkipati A, Lauria HA, et al. The impact of visualization dashboards on  
16  
17 quality of care and clinician satisfaction: Integrative literature review. *JMIR Human*  
18  
19 *Factors* 2018;5(2):e22. doi: 10.2196/humanfactors.9328 [published Online First:  
20  
21 2018/06/02]  
22  
23
- 24 33. Buttigieg SC, Pace A, Rathert C. Hospital performance dashboards: A literature review.  
25  
26 *Journal of Health Organization and Management* 2017;31(3):385-406. doi:  
27  
28 10.1108/jhom-04-2017-0088 [published Online First: 2017/07/08]  
29  
30
- 31 34. Franklin A, Gantela S, Shifarrow S, et al. Dashboard visualizations: Supporting real-time  
32  
33 throughput decision-making. *Journal of Biomedical Informatics* 2017;71:211-21. doi:  
34  
35 10.1016/j.jbi.2017.05.024  
36  
37
- 38 35. Kapadia V, Ariani A, Li J, et al. Emerging ICT implementation issues in aged care.  
39  
40 *International Journal of Medical Informatics* 2015;84(11):892-900. doi:  
41  
42 10.1016/j.ijmedinf.2015.07.002  
43  
44
- 45 36. Vogelsmeier AA, Halbesleben JR, Scott-Cawiezell JR. Technology implementation and  
46  
47 workarounds in the nursing home. *Journal of the American Medical Informatics*  
48  
49 *Association* 2008;15(1):114-19. doi: 10.1197/jamia.M2378  
50  
51
- 52 37. World Health Organization. WHO global report on falls prevention in older age. Paris,  
53  
54 France: WHO, 2007.  
55
- 56 38. Australian Institute of Health and Welfare. Trends in Hospitalised Injury Due to Falls in  
57  
58 Older People, 2002–03 to 2014–15. Canberra, Australia: AIHW, 2018.  
59  
60

- 1  
2  
3 39. Watson WL, Clapperton AJ, Mitchell RJ. The cost of fall-related injuries among older  
4  
5 people in NSW, 2006–07. *New South Wales Public Health Bulletin* 2011;22(4):55-59.  
6  
7 doi: 10.1071/NB10002  
8  
9
- 10 40. Mitchell R, Harvey L, Draper B, et al. Risk factors associated with residential aged care,  
11  
12 respite and transitional aged care admission for older people following an injury-  
13  
14 related hospitalisation. *Archives of Gerontology and Geriatrics* 2017;72:59-66. doi:  
15  
16 10.1016/j.archger.2017.05.012  
17  
18
- 19 41. Lucero RJ, Lindberg DS, Fehlberg EA, et al. A data-driven and practice-based approach  
20  
21 to identify risk factors associated with hospital-acquired falls: Applying manual and  
22  
23 semi- and fully-automated methods. *International Journal of Medical Informatics*  
24  
25 2019;122:63-69. doi: 10.1016/j.ijmedinf.2018.11.006 [published Online First:  
26  
27 2019/01/10]  
28  
29
- 30 42. Organisation for Economic Co-operation and Development, European Union. A Good  
31  
32 Life in Old Age? Monitoring and Improving Quality in Long-Term Care. Paris,  
33  
34 France: OECD Publishing, 2013.  
35  
36
- 37 43. Tesch-Roemer C. Active Ageing and Quality of Life in old Age. Geneva, Switzerland:  
38  
39 UNECE, 2010.  
40  
41
- 42 44. COTA Australia. Measuring Quality and Consumer Choice in Aged Care. Canberra,  
43  
44 Australia: COTA Australia, 2018.  
45  
46
- 47 45. Courtney M, Edwards H, Stephan J, et al. Quality of life measures for residents of aged  
48  
49 care facilities: A literature review. *Australasian Journal on Ageing* 2003;22(2):58-64.  
50  
51 doi: 10.1111/j.1741-6612.2003.tb00467.x  
52  
53
- 54 46. Courtney M, O'Reilly M, Edwards H, et al. The relationship between clinical outcomes  
55  
56 and quality of life for residents of aged care facilities. *Australian Journal of Advanced*  
57  
58 *Nursing* 2009;26(4):49-57.  
59  
60

- 1  
2  
3 47. Beer C, Flicker L, Horner B, et al. Factors associated with self and informant ratings of  
4  
5 the quality of life of people with dementia living in care facilities: A cross sectional  
6  
7 study. *PloS one* 2010;5(12):e15621-e21. doi: 10.1371/journal.pone.0015621  
8  
9
- 10 48. Bowling A, Rowe G, Adams S, et al. Quality of life in dementia: A systematically  
11  
12 conducted narrative review of dementia-specific measurement scales. *Ageing & Mental*  
13  
14 *Health* 2015;19(1):13-31. doi: 10.1080/13607863.2014.915923  
15  
16
- 17 49. Missotten P, Dupuis G, Adam S. Dementia-specific quality of life instruments: A  
18  
19 conceptual analysis. *Int Psychogeriatr* 2016;28(8):1245-62. doi:  
20  
21 10.1017/s1041610216000417 [published Online First: 2016/03/24]  
22  
23
- 24 50. Aspden T, Bradshaw SA, Playford ED, et al. Quality-of-life measures for use within care  
25  
26 homes: A systematic review of their measurement properties. *Age and Ageing*  
27  
28 2014;43(5):596-603. doi: 10.1093/ageing/afu089 [published Online First: 2014/08/06]  
29  
30
- 31 51. Cleland J, Hutchinson C, McBain C, et al. Developing dimensions for a new preference-  
32  
33 based quality of life instrument for older people receiving aged care services in the  
34  
35 community. *Quality of Life Research* 2020 doi: 10.1007/s11136-020-02649-5  
36  
37 [published Online First: 2020/09/30]  
38  
39
- 40 52. Cleland J, Hutchinson C, Khadka J, et al. A review of the development and application of  
41  
42 generic preference-based instruments with the older population. *Applied Health*  
43  
44 *Economics and Health Policy* 2019;17(6):781-801. doi: 10.1007/s40258-019-00512-4  
45  
46 [published Online First: 2019/09/13]  
47  
48
- 49 53. Ratcliffe J, Flint T, Easton T, et al. An empirical comparison of the EQ-5D-5L,  
50  
51 DEMQOL-U and DEMQOL-Proxy-U in a Post-hospitalisation population of frail  
52  
53 older people living in residential aged care. *Applied Health Economics and Health*  
54  
55 *Policy* 2017;15(3):399-412. doi: 10.1007/s40258-016-0293-7  
56  
57  
58  
59  
60

- 1  
2  
3 54. Australian Government. Commonwealth Home Support Programme, Program Manual  
4  
5 2018-2020. Canberra, Australia: Commonwealth of Australia, 2018.  
6  
7  
8 55. Blomkamp E. Sharing the principles of co-design 2018 [Available from:  
9  
10 [https://medium.com/@emmablomkamp/sharing-the-principles-of-co-design-](https://medium.com/@emmablomkamp/sharing-the-principles-of-co-design-4a976bb55c48)  
11  
12 [4a976bb55c48](https://medium.com/@emmablomkamp/sharing-the-principles-of-co-design-4a976bb55c48) accessed 23 May 2021.  
13  
14  
15 56. New South Wales Council of Social Services. Principles of co-design 2017 [Available  
16  
17 from: <https://www.ncoss.org.au/wp-content/uploads/2017/06/Codesign-principles.pdf>  
18  
19 accessed 23 May 2021.  
20  
21  
22 57. Ballermann MA, Shaw NT, Mayes DC, et al. Validation of the Work Observation  
23  
24 Method By Activity Timing (WOMBAT) method of conducting time-motion  
25  
26 observations in critical care settings: An observational study. *BMC Med Inform Decis*  
27  
28 *Mak* 2011;11:32. doi: 10.1186/1472-6947-11-32 [published Online First: 2011/05/19]  
29  
30  
31 58. Westbrook JI, Ampt A. Design, application and testing of the Work Observation Method  
32  
33 by Activity Timing (WOMBAT) to measure clinicians' patterns of work and  
34  
35 communication. *International Journal of Medical Informatics* 2009;78 Suppl 1:S25-  
36  
37 33. doi: 10.1016/j.ijmedinf.2008.09.003 [published Online First: 2008/10/28]  
38  
39  
40 59. Mayring P. Qualitative content analysis. In: Uwe F, von Kardoff E, Steinke I, eds. A  
41  
42 Companion to Qualitative Research. London, UK: SAGE Publications 2004:266-69.  
43  
44  
45 60. Elo S, Kyngäs H. The qualitative content analysis process. *Journal of Advanced Nursing*  
46  
47 2008;62(1):107-15. doi: 10.1111/j.1365-2648.2007.04569.x  
48  
49  
50 61. Pawson R, Tilley N. Realistic Evaluation. London, UK: SAGE Publications 1997.  
51  
52  
53 62. QSR International. NVivo Burlington, MA: QSR International; n.d. [Available from:  
54  
55 <https://www.qsrinternational.com/nvivo-qualitative-data-analysis-software/home>.  
56  
57  
58  
59  
60



- 1  
2  
3 63. Tai P, Chapman J-AW, Yu E, et al. Disease-specific survival for limited-stage small-cell  
4 lung cancer affected by statistical method of assessment. *BMC Cancer* 2007;7(1):31.  
5  
6 doi: 10.1186/1471-2407-7-31  
7  
8  
9  
10 64. Prentice RL. Regression analysis of censored survival data with extensions to include  
11 competing risks and case-control studies. *Environment International* 1978;1(6):321-  
12  
13 29. doi: 10.1016/0160-4120(78)90007-7  
14  
15  
16  
17 65. Jaspers MW, Steen T, Van Den Bos C, et al. The think aloud method: A guide to user  
18 interface design. *International Journal of Medical Informatics* 2004;73(11-12):781-  
19  
20 95. doi: 10.1016/j.ijmedinf.2004.08.003  
21  
22  
23  
24 66. Brett L, Siette J, Nguyen A, et al. At the grassroots of home and community-based aged  
25 care: strategies for successful consumer engagement. *BMJ Open* 2019;9(11):e028754.  
26  
27 doi: 10.1136/bmjopen-2018-028754  
28  
29  
30  
31 67. Boylorn RM. Participants as co-researchers. In: Given LM, ed. *The SAGE Encyclopedia*  
32 of Qualitative Research Methods. Thousand Oaks, CA: SAGE Publications 2008:599-  
33  
34 601.  
35  
36  
37  
38  
39

## 40 **DECLARATIONS**

### 41 **Competing interests**

42 The authors declare that they have no competing interests.

### 43 **Funding**

44 This project was funded by an Australian National Health and Medical Research Council  
45 (NHMRC) Partnership Project Grant in partnership with Anglicare (1170898). The NHMRC  
46 did not have any influence on the design of the study and collection, analysis, and  
47 interpretation of data. MR is supported by an NHMRC Early Career Fellowship (1143941).  
48 JW is supported by a NHMRC Elizabeth Blackburn Leadership Investigator Grant  
49  
50  
51  
52  
53  
54  
55  
56  
57  
58  
59  
60

1  
2  
3 (1174021). JB is supported by an NHMRC Leadership Investigator Grant (1176620), the  
4  
5 NHMRC Partnership Centre in Health System Sustainability (Grant ID 9100002) and  
6  
7 APP1135058.  
8  
9

### 10 **Authors' contributions**

11  
12  
13 This protocol was based on a successful funding application prepared by the chief  
14  
15 investigators JW, MB, LCG, RD, JR, SRL, AG and JB with input from the associate  
16  
17 investigators (MZR, JC, EB, WYZ, DD, JR, DR), staff from the aged care partner  
18  
19 organisation (MC, AT, JS, JW), research partners (LO, CS, RH) and members of the project  
20  
21 team working on the research (KL, MJ, KEL, ADN, JS, KS, MM). KL drafted the protocol  
22  
23 and all authors contributed to reviewing and approving the final version.  
24  
25  
26

### 27 **Acknowledgements**

28  
29  
30 The authors wish to acknowledge our partners and collaborators; Anglicare, Sydney North  
31  
32 Primary Health Network, Northern Sydney Local Health District, the Deeble Institute for  
33  
34 Health Policy Research from the Australian Healthcare and Hospitals Association, and the  
35  
36 Aged Care Quality and Safety Commission.  
37  
38  
39  
40  
41

### 42 **FIGURE LEGEND**

43  
44  
45 **Figure 1: Example of a dashboard to predict risk and deliver actionable information**

46  
47  
48 **Figure 2: Overview of study design: components, processes, and data sources**  
49  
50  
51  
52  
53  
54  
55  
56  
57  
58  
59  
60

|                     | <b>1. Dashboard co-design</b>                                                                                                                                                                                                                      | <b>2. Data integration and risk models</b>                                                                                                                                 | <b>3. Prototype testing</b>                                                                                                               |
|---------------------|----------------------------------------------------------------------------------------------------------------------------------------------------------------------------------------------------------------------------------------------------|----------------------------------------------------------------------------------------------------------------------------------------------------------------------------|-------------------------------------------------------------------------------------------------------------------------------------------|
| <b>Processes</b>    | <ul style="list-style-type: none"> <li>Investigate end-users' needs and preferences</li> <li>Design dashboard features, functions, and presentation with users</li> <li>Seek user feedback on dashboard prototypes to guide refinements</li> </ul> | <ul style="list-style-type: none"> <li>Integrate siloed aged care data sources</li> <li>Develop and validate risk models using linked health and aged care data</li> </ul> | <ul style="list-style-type: none"> <li>Conduct usability testing with users</li> </ul>                                                    |
| <b>Data sources</b> | <ul style="list-style-type: none"> <li>Observations of routine work</li> <li>Interviews</li> <li>Focus groups</li> <li>Workshop</li> <li>Community forum</li> </ul>                                                                                | <ul style="list-style-type: none"> <li>Anglicare's client records</li> <li>NSW EDDC</li> <li>NSW APDC</li> <li>NSW RBDM</li> </ul>                                         | <ul style="list-style-type: none"> <li>Think-aloud task-based scenario walkthroughs</li> <li>Follow-up interviews/focus groups</li> </ul> |

NSW=New South Wales; EDDC=Emergency Department Data Collection; APDC=Admitted Patient Data Collection; RBDM=Registry of Births, Deaths and Marriages registries

Overview of study design: components, processes, and data sources

609x521mm (57 x 57 DPI)

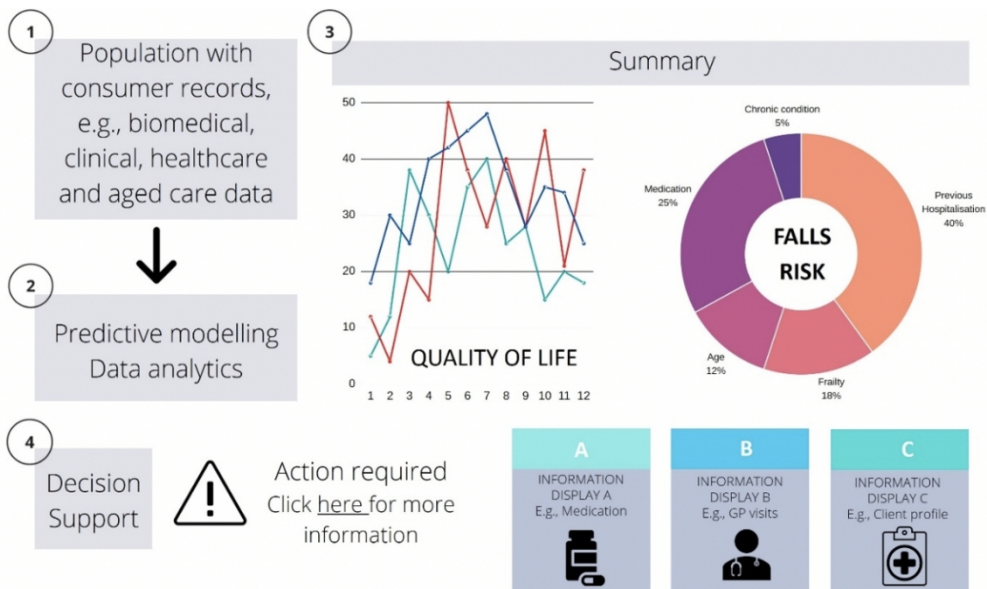

Example of a dashboard to predict risk and deliver actionable information

532x327mm (57 x 57 DPI)

# BMJ Open

## Co-designing a dashboard of predictive analytics and decision support to drive care quality and client outcomes in aged care: A mixed-methods study protocol

|                               |                                                                                                                                                                                                                                                                                                                                                                                                                                                                                                                                                                                                                                                                                                                                                                                                                                                                                                                                                                                                                                                                                                                                                                                                                                                                                                                                                                                                                                                                                                                                                                                                                                                                                                                                                                                                                                                                                                                                                                                                                                                                                                                                                                                                                                                                                                                                                                                                     |
|-------------------------------|-----------------------------------------------------------------------------------------------------------------------------------------------------------------------------------------------------------------------------------------------------------------------------------------------------------------------------------------------------------------------------------------------------------------------------------------------------------------------------------------------------------------------------------------------------------------------------------------------------------------------------------------------------------------------------------------------------------------------------------------------------------------------------------------------------------------------------------------------------------------------------------------------------------------------------------------------------------------------------------------------------------------------------------------------------------------------------------------------------------------------------------------------------------------------------------------------------------------------------------------------------------------------------------------------------------------------------------------------------------------------------------------------------------------------------------------------------------------------------------------------------------------------------------------------------------------------------------------------------------------------------------------------------------------------------------------------------------------------------------------------------------------------------------------------------------------------------------------------------------------------------------------------------------------------------------------------------------------------------------------------------------------------------------------------------------------------------------------------------------------------------------------------------------------------------------------------------------------------------------------------------------------------------------------------------------------------------------------------------------------------------------------------------|
| Journal:                      | <i>BMJ Open</i>                                                                                                                                                                                                                                                                                                                                                                                                                                                                                                                                                                                                                                                                                                                                                                                                                                                                                                                                                                                                                                                                                                                                                                                                                                                                                                                                                                                                                                                                                                                                                                                                                                                                                                                                                                                                                                                                                                                                                                                                                                                                                                                                                                                                                                                                                                                                                                                     |
| Manuscript ID                 | bmjopen-2021-048657.R2                                                                                                                                                                                                                                                                                                                                                                                                                                                                                                                                                                                                                                                                                                                                                                                                                                                                                                                                                                                                                                                                                                                                                                                                                                                                                                                                                                                                                                                                                                                                                                                                                                                                                                                                                                                                                                                                                                                                                                                                                                                                                                                                                                                                                                                                                                                                                                              |
| Article Type:                 | Protocol                                                                                                                                                                                                                                                                                                                                                                                                                                                                                                                                                                                                                                                                                                                                                                                                                                                                                                                                                                                                                                                                                                                                                                                                                                                                                                                                                                                                                                                                                                                                                                                                                                                                                                                                                                                                                                                                                                                                                                                                                                                                                                                                                                                                                                                                                                                                                                                            |
| Date Submitted by the Author: | 31-Jul-2021                                                                                                                                                                                                                                                                                                                                                                                                                                                                                                                                                                                                                                                                                                                                                                                                                                                                                                                                                                                                                                                                                                                                                                                                                                                                                                                                                                                                                                                                                                                                                                                                                                                                                                                                                                                                                                                                                                                                                                                                                                                                                                                                                                                                                                                                                                                                                                                         |
| Complete List of Authors:     | <p>Ludlow, Kristiana; Macquarie University, Centre for Health Systems and Safety Research, Australian Institute of Health Innovation; The University of Queensland School of Psychology<br/> Westbrook, Johanna; Macquarie University, Centre for Health Systems and Safety Research, Australian Institute of Health Innovation,<br/> Jorgensen, Mikaela; Macquarie University, Centre for Health Systems and Safety Research, Australian Institute of Health Innovation<br/> Lind, Kimberly ; The University of Arizona, Department of Health Promotion Sciences, Mel &amp; Enid Zuckerman College of Public Health<br/> Baysari, Melissa; The University of Sydney Faculty of Medicine and Health, Discipline of Biomedical Informatics and Digital Health, Charles Perkins Centre<br/> Gray, Len; The University of Queensland, Centre for Research in Geriatric Medicine<br/> Day, Richard; University of New South Wales, St Vincent's Clinical School<br/> Ratcliffe, Julie; Flinders University of South Australia, College of Nursing and Health Sciences;<br/> Lord, Stephen; Neuroscience Research Australia; University of New South Wales, School of Public health and Community Medicine<br/> Georgiou, A; Macquarie University, Centre for Health Systems and Safety Research, Australian Institute of Health Innovation<br/> Braithwaite, Jeffrey; Macquarie University, Centre for Healthcare Resilience and Implementation Science, Australian Institute of Health Innovation; ISQua<br/> Raban, Magdalena; Macquarie University, Centre for Health Systems and Safety Research, Australian Institute of Health Innovation<br/> Close, Jacqueline; Neuroscience Research Australia<br/> Beattie, Elizabeth; Queensland University of Technology, School of Nursing<br/> Zheng, Wu Yi; Black Dog Institute<br/> Debono, Deborah; University of Technology Sydney, School of Public Health, Faculty of Health<br/> Nguyen, A; Macquarie University, Centre for Health Systems and Safety Research, Australian Institute of Health Innovation; University of New South Wales, St Vincent's Clinical School<br/> Siette, Joyce; Macquarie University, Centre for Health Systems and Safety Research, Australian Institute of Health Innovation<br/> Seaman, Karla ; Macquarie University, Centre for Health Systems and Safety Research, Australian Institute of Health Innovation</p> |

|                                   |                                                                                                                                                                                                                                                                                                                                                                                                                                                                                                                                                             |
|-----------------------------------|-------------------------------------------------------------------------------------------------------------------------------------------------------------------------------------------------------------------------------------------------------------------------------------------------------------------------------------------------------------------------------------------------------------------------------------------------------------------------------------------------------------------------------------------------------------|
|                                   | Miao, Melissa; University of Technology Sydney, Graduate School of Health, Faculty of Health<br>Root, Jo; Consumers Health Forum of Australia<br>Roffe, David; IT Consultant<br>O'Toole, Libby; Aged Care Quality and Safety Commission<br>Carrasco, Marcela; Anglicare Sydney<br>Thompson, Alex; Anglicare Sydney<br>Shaikh, Javed; Anglicare Sydney<br>Wong, Jeffrey; Anglicare Sydney<br>Stanton, Cynthia; Sydney North Health Network<br>Haddock, Rebecca; Australian Healthcare and Hospitals Association, Deeble Institute for Health Policy Research |
| <b>Primary Subject Heading:</b>   | Health informatics                                                                                                                                                                                                                                                                                                                                                                                                                                                                                                                                          |
| <b>Secondary Subject Heading:</b> | Evidence based practice, Geriatric medicine, Health services research                                                                                                                                                                                                                                                                                                                                                                                                                                                                                       |
| <b>Keywords:</b>                  | Health informatics < BIOTECHNOLOGY & BIOINFORMATICS, Information technology < BIOTECHNOLOGY & BIOINFORMATICS, Health & safety < HEALTH SERVICES ADMINISTRATION & MANAGEMENT, Quality in health care < HEALTH SERVICES ADMINISTRATION & MANAGEMENT, Risk management < HEALTH SERVICES ADMINISTRATION & MANAGEMENT, GERIATRIC MEDICINE                                                                                                                                                                                                                        |
|                                   |                                                                                                                                                                                                                                                                                                                                                                                                                                                                                                                                                             |

SCHOLARONE™  
Manuscripts



I, the Submitting Author has the right to grant and does grant on behalf of all authors of the Work (as defined in the below author licence), an exclusive licence and/or a non-exclusive licence for contributions from authors who are: i) UK Crown employees; ii) where BMJ has agreed a CC-BY licence shall apply, and/or iii) in accordance with the terms applicable for US Federal Government officers or employees acting as part of their official duties; on a worldwide, perpetual, irrevocable, royalty-free basis to BMJ Publishing Group Ltd ("BMJ") its licensees and where the relevant Journal is co-owned by BMJ to the co-owners of the Journal, to publish the Work in this journal and any other BMJ products and to exploit all rights, as set out in our [licence](#).

The Submitting Author accepts and understands that any supply made under these terms is made by BMJ to the Submitting Author unless you are acting as an employee on behalf of your employer or a postgraduate student of an affiliated institution which is paying any applicable article publishing charge ("APC") for Open Access articles. Where the Submitting Author wishes to make the Work available on an Open Access basis (and intends to pay the relevant APC), the terms of reuse of such Open Access shall be governed by a Creative Commons licence – details of these licences and which [Creative Commons](#) licence will apply to this Work are set out in our licence referred to above.

Other than as permitted in any relevant BMJ Author's Self Archiving Policies, I confirm this Work has not been accepted for publication elsewhere, is not being considered for publication elsewhere and does not duplicate material already published. I confirm all authors consent to publication of this Work and authorise the granting of this licence.

1  
2  
3 **Co-designing a dashboard of predictive analytics and decision support to drive care**  
4 **quality and client outcomes in aged care: A mixed-methods study protocol**  
5  
6  
7  
8  
9

10 Kristiana Ludlow\*<sup>1,2</sup>, Johanna Westbrook<sup>1</sup>, Mikaela Jorgensen<sup>1</sup>, Kimberly E. Lind<sup>3</sup>, Melissa  
11 Baysari<sup>4</sup>, Len C. Gray<sup>5</sup>, Richard Day<sup>6</sup>, Julie Ratcliffe<sup>7</sup>, Stephen R. Lord<sup>8,9</sup>, Andrew  
12 Georgiou<sup>1</sup>, Jeffrey Braithwaite<sup>10,11</sup>, Magdalena Z. Raban<sup>1</sup>, Jacqueline Close<sup>8</sup>, Elizabeth  
13 Beattie<sup>12</sup>, Wu Yi Zheng<sup>13</sup>, Deborah Debono<sup>14</sup>, Amy D. Nguyen<sup>1,6</sup>, Joyce Siette<sup>1</sup>, Karla  
14 Seaman<sup>1</sup>, Melissa Miao<sup>15</sup>, Jo Root<sup>16</sup>, David Roffe<sup>17</sup>, Libby O'Toole<sup>18</sup>, Marcela Carrasco<sup>19</sup>,  
15 Alex Thompson<sup>19</sup>, Javed Shaikh<sup>19</sup>, Jeffrey Wong<sup>19</sup>, Cynthia Stanton<sup>20</sup>, Rebecca Haddock<sup>21</sup>  
16  
17  
18  
19  
20  
21  
22  
23  
24  
25  
26  
27

28 <sup>1</sup> Centre for Health Systems and Safety Research, Australian Institute of Health Innovation,  
29 Macquarie University, Sydney, Australia  
30

31 <sup>2</sup> School of Psychology, University of Queensland, Brisbane, Australia  
32

33 <sup>3</sup> Department of Health Promotion Sciences, Mel & Enid Zuckerman College of Public  
34 Health, The University of Arizona, Tucson, AZ, United States of America  
35  
36  
37

38 <sup>4</sup> Discipline of Biomedical Informatics and Digital Health, Charles Perkins Centre, Faculty of  
39 Medicine and Health, The University of Sydney  
40  
41  
42

43 <sup>5</sup> Centre for Health Services Research, University of Queensland, Brisbane, Australia  
44

45 <sup>6</sup> St Vincent's Clinical School, University of New South Wales, Sydney, Australia  
46  
47

48 <sup>7</sup> College of Nursing and Health Sciences, Flinders University, Adelaide, Australia  
49

50 <sup>8</sup> Neuroscience Research Australia, Sydney, Australia  
51  
52

53 <sup>9</sup> School of Public health and Community Medicine, University of New South Wales,  
54 Sydney, Australia  
55  
56  
57  
58  
59  
60



1  
2  
3 <sup>10</sup> Centre for Healthcare Resilience and Implementation Science, Australian Institute of  
4 Health Innovation, Macquarie University, Sydney, Australia  
5  
6  
7

8 <sup>11</sup> The International Society for Quality in Health Care, Dublin, Ireland  
9

10 <sup>12</sup> School of Nursing, Queensland University of Technology, Brisbane, Australia  
11  
12

13 <sup>13</sup> Black Dog Institute, Sydney, Australia  
14  
15

16 <sup>14</sup> School of Public Health, Faculty of Health, University of Technology Sydney, Sydney,  
17 Australia  
18  
19

20 <sup>15</sup> Graduate School of Health, Faculty of Health, University of Technology Sydney, Sydney,  
21 Australia  
22  
23

24 <sup>16</sup> Consumers Health Forum of Australia, Deakin, Australia  
25  
26

27 <sup>17</sup> IT consultant  
28  
29

30 <sup>18</sup> Aged Care Quality and Safety Commission, Sydney, Australia  
31  
32

33 <sup>19</sup> Anglicare, Sydney, Australia  
34  
35

36 <sup>20</sup> Sydney North Health Network, Sydney, Australia  
37  
38

39 <sup>21</sup> Deeble Institute for Health Policy Research, Australian Healthcare and Hospitals  
40 Association, Canberra, Australia  
41  
42  
43  
44  
45

46 \* Corresponding author details:  
47  
48

49 Address: Level 6, 75 Talavera Road, Macquarie University, NSW 2109, Australia; email:

50 [kristiana.ludlow@mq.edu.au](mailto:kristiana.ludlow@mq.edu.au)  
51  
52  
53  
54  
55

## 56 **KEYWORDS**

57  
58

59 Health informatics; Information technology; Health & Safety; Quality in Health care; Risk  
60

1  
2  
3 Management; Geriatric Medicine  
4  
5  
6  
7

8 Word count: 4,651  
9

## 10 **ABSTRACT**

### 11 **Introduction**

12  
13  
14  
15  
16 There is a clear need for improved care quality and quality monitoring in aged care. Aged  
17 care providers collect an abundance of data, yet rarely are these data integrated and  
18 transformed in real-time into actionable information to support evidence-based care, nor are  
19 they shared with older people and informal caregivers. This protocol describes the co-design  
20 and testing of a dashboard in residential aged care facilities (nursing or care homes) and  
21 community-based aged care settings (formal care provided at home or in the community).  
22 The dashboard will comprise integrated data to provide an ‘at-a-glance’ overview of aged  
23 care clients, indicators to identify clients at risk of fall-related hospitalisations and poor  
24 quality of life, and evidence-based decision support to minimise these risks. Longer-term  
25 plans for dashboard implementation and evaluation are also outlined.  
26  
27  
28  
29  
30  
31  
32  
33  
34  
35  
36  
37  
38

### 39 **Methods**

40  
41  
42 This mixed-methods study will involve (i) co-designing dashboard features with aged care  
43 staff, clients, informal caregivers and general practitioners (GPs), (ii) integrating aged care  
44 data silos and developing risk models, and (iii) testing dashboard prototypes with users. The  
45 dashboard features will be informed by direct observations of routine work, interviews and  
46 focus groups with users, and a community forum. Multivariable discrete time survival models  
47 will be used to develop risk indicators, using predictors from linked historical aged care and  
48 hospital data. Dashboard prototype testing will comprise interviews, focus groups and walk-  
49 through scenarios using a think-aloud approach with staff members, clients and informal  
50  
51  
52  
53  
54  
55  
56  
57  
58  
59  
60

1  
2  
3 caregivers, and a GP workshop.  
4  
5

### 6 **Ethics and dissemination**

7

8 This study has received ethical approval from the NSW Population & Health Services  
9 Research Ethics Committee and Macquarie University's Human Research Ethics Committee.  
10  
11 The research findings will be presented to the aged care provider who will share results with  
12  
13 staff members, clients and informal caregivers. Findings will be disseminated as peer-  
14  
15 reviewed journal articles, policy briefs and conference presentations.  
16  
17  
18  
19  
20  
21  
22

### 23 **STRENGTHS AND LIMITATIONS OF THIS STUDY**

24

- 25 • The linkage of multiple data sources will allow for comprehensive information about  
26 aged care clients' health conditions, psychosocial characteristics, care management,  
27 hospitalisations, and quality of life.  
28
- 29 • The dashboard's use of existing routinely collected data will enable the prediction of risk,  
30 and provide evidence-based guidance, in real-time.  
31
- 32 • To ensure that the dashboard is fit-for-purpose, the dashboard will be co-designed and  
33 tested with intended users (staff, aged care clients, informal caregivers, and general  
34 practitioners).  
35
- 36 • The dashboard will be designed to have generic characteristics which will allow it to be  
37 embedded into existing aged care information technology to facilitate its transferability  
38 and sustainability.  
39
- 40 • Most aged care services in this study will be located in major cities, therefore, findings  
41 will be limited in regional and remote areas, where client profiles and staff workflows  
42 could be different.  
43  
44  
45  
46  
47  
48  
49  
50  
51  
52  
53  
54  
55  
56  
57  
58  
59  
60

## INTRODUCTION

Good quality care relies upon the availability of good quality data and real-time analytics to support decision-making. This is particularly the case for older people with complex health needs who are supported by a wide-range of people in different settings. Aged care services have not been well served by information systems that support everyday care provision.

Internationally, there is consistent evidence that aged care systems are struggling to provide high quality services for older adults, with shortcomings highlighted by many recent reviews, reports and research.<sup>1-5</sup> The delivery of optimal care is hindered by a lack of integration between aged care and other healthcare services, fragmented funding systems, inadequate infrastructure, insufficient workforce training and support, and a widening gap between supply and demand of services.<sup>6</sup>

In Australia, concerns about suboptimal care and escalating pressure on aged care services has led to more than 40 major inquiries and reviews over the past 40 years,<sup>7</sup> the latest being the Royal Commission into Aged Care Quality and Safety (2018-20). The purpose of the Royal Commission is to examine the current state of the aged care system and determine what is needed to improve it for those receiving care now and into the future.<sup>1 8</sup> The Commission's findings have made it clear that the community is demanding better quality aged care and greater transparency: a system that meets older peoples' needs, identifies when they are at risk, and responds in effective and compassionate ways.<sup>1 9 10</sup>

Despite enormous amounts of data collected in the sector, there continues to be considerable problems for informal caregivers, providers, and governments to obtain

1  
2  
3 meaningful information to allow the monitoring of care delivery and outcomes, and to guide  
4 effective decision-making.<sup>1</sup> The increasing use of electronic systems provides an opportunity  
5 to address some of these shortcomings. The World Health Organization's World Report on  
6 Ageing and Health identified information and communication technologies (ICT) as a  
7 "critical tool for transforming health systems and services to deliver person-centred and  
8 integrated care that is appropriate to older people".<sup>6(p. 109)</sup> The report outlines some of the  
9 anticipated and demonstrated benefits of utilising ICT in terms of access to services, quality  
10 and safety of care, cost effectiveness of services, accessibility of information and knowledge,  
11 social care and connectedness, and the provision of evidence-based care.<sup>6</sup>  
12  
13  
14  
15  
16  
17  
18  
19  
20  
21  
22  
23  
24  
25  
26

### 27 **Data rich but information poor**

28  
29 While the last decade has seen substantial uptake of ICT by aged care sectors  
30 internationally,<sup>11</sup> the potential of these systems to transform care quality by increasing the  
31 usability and transparency of aged care information remains largely unrealised.<sup>11</sup> Health and  
32 aged care systems are often characterised as '*data rich but information poor*',<sup>12 13</sup> meaning  
33 that although providers collect vast amounts of clinical and care management data, these data  
34 frequently exist within silos that are rarely integrated to create meaningful information to  
35 support care staff to coordinate, monitor and enhance care delivery. In Australia, these  
36 information silos are often driven by variations in funding and ownership of data (e.g.,  
37 between aged care and healthcare, or between State and Federal governments). Furthermore,  
38 these data are not often shared with the people who are the subject of data collection (i.e.,  
39 those receiving services and their informal caregivers) or with the general public who largely  
40 fund aged care services through tax contributions.  
41  
42  
43  
44  
45  
46  
47  
48  
49  
50  
51  
52  
53  
54  
55  
56

57 Data have traditionally been used for reporting purposes rather than quality  
58 improvement activities or driving care processes. Several countries have mandated systems  
59  
60

1  
2  
3 for collecting and reporting aged care information,<sup>14</sup> for example, the Home Care Reporting  
4 System and Continuing Care Reporting System in Canada, the United States' MDS 3.0 and  
5 Nursing Home Compare, Sweden's Open Comparisons national quality monitoring system,  
6 and the International Resident Assessment Instrument Long-Term Care Facility (interRAI-  
7 LTCF) Assessment System in New Zealand. Australia's aged care system lags behind other  
8 Organisation for Economic Co-operation and Development (OECD) countries in terms of  
9 measuring and reporting on aged care quality.<sup>15</sup> For example, Australia's National Aged Care  
10 Mandatory Quality Indicator Program,<sup>16</sup> operating since 2019, collects information on three  
11 quality indicators (physical restraint use, pressure ulcers and weight loss) in residential aged  
12 care settings (also known as assisted living facilities, nursing homes, care homes, long-term  
13 care facilities, and skilled nursing facilities). The aggregated data that are publicly reported  
14 for this program allow comparisons to be made between providers. Additional quality  
15 indicators for falls and major injury, and medication management are being introduced to the  
16 program in 2021. Currently, there is no system for mandatory reporting of quality indicators  
17 in community aged care settings (i.e., formal aged care services provided in the home and  
18 community, such as domestic assistance, social support, gardening, transport). Limited and  
19 disparate information on the quality of aged care in Australia reduces the capacity for older  
20 adults and their caregivers to make informed decisions about their care. Without this  
21 information, providers are limited in their ability to monitor and benchmark key quality  
22 indicators across services, initiate improvement activities, and systematically and iteratively  
23 assess the effectiveness and cost-effectiveness of services and interventions.

### 54 **Predictive risk models**

55  
56  
57 Very little attention has been placed on the power of new analytic models to exploit the  
58 increasing volume of data that are stored in aged care IT systems. Initial research to capitalise  
59  
60

1  
2  
3 on this valuable information source has focused on retrospective and descriptive analyses.<sup>17 18</sup>  
4  
5 This foundational research has demonstrated the potential value of these data to better  
6  
7 understand quality of care issues.<sup>19-21</sup> Further, this work has shown that it is possible to create  
8  
9 automated risk-adjusted indicators of client care and outcomes by linking existing  
10  
11 administrative, clinical and care management datasets routinely collected by providers.<sup>22 23</sup> A  
12  
13 number of studies in the acute care sector have shown the possibilities of leveraging  
14  
15 electronic data systems to implement real-time predictive risk models.<sup>24-27</sup> These models have  
16  
17 been used to identify clients who are at risk of adverse events earlier and facilitate the uptake  
18  
19 of tailored evidence-based strategies by time-poor staff.<sup>28-31</sup>  
20  
21  
22  
23  
24  
25  
26

## 27 **Dashboards**

28  
29 Dashboards offer promise in integrating multiple data sources and supporting the use of  
30  
31 predictive analytics to improve client care. They allow for a single-view summary of an  
32  
33 individual's information and can provide decision-related information using text and visual  
34  
35 features. These summaries can be dynamic; reflecting changes in clinical environments and a  
36  
37 person's information in real-time. Dashboards typically utilise graphical information displays  
38  
39 and colour, allowing users to easily interact with and explore important information.  
40  
41

42  
43 Dashboards may include features that alert users to areas requiring attention, such as  
44  
45 deteriorating patients or those at high risk of injury or harm. They may also provide support  
46  
47 tools to guide staff members' responses to alerts. These features allow for the quick and  
48  
49 targeted communication of information, helping reduce the cognitive effort of users and  
50  
51 enabling them to make informed decisions effectively and efficiently (Figure 1).  
52  
53  
54  
55  
56

57  
58 **<Insert Figure 1 here>**  
59  
60

1  
2  
3  
4  
5 Dashboards have predominantly been implemented and evaluated in primary, acute  
6  
7 and mental health care.<sup>32-34</sup> In these settings, dashboards have been shown to improve  
8  
9 clinician situational awareness, decision-making, and guideline adherence, positively  
10  
11 affecting outcomes such as mortality.<sup>32 35</sup> At an organisational-level, dashboards can improve  
12  
13 the detection of overdue tasks, procedural bottlenecks, and support better resource  
14  
15 allocation.<sup>35</sup> At the client-level, they have the potential to make meaningful information  
16  
17 accessible to clients and their families, placing individuals at the centre of their own  
18  
19 information and care. Dashboards are less commonly used in aged care settings, which may  
20  
21 encounter specific challenges with uptake and use due to poor ICT infrastructure and support  
22  
23 services, and a workforce with lower computer experience and digital literacy skills than  
24  
25 found in acute care settings.<sup>36 37</sup>  
26  
27  
28  
29  
30  
31  
32

### 33 **Rationale**

34  
35 Anglicare, a large non-profit aged care provider located in New South Wales (NSW),  
36  
37 Australia, identified the critical need for leveraging their electronic systems to support  
38  
39 evidence-based practice across their services. The Australian Institute of Health Innovation,  
40  
41 Macquarie University, is partnering with Anglicare; the Sydney North Health Network  
42  
43 (SNHN); the Northern Sydney Local Health District (NSLHD); the Deeble Institute for  
44  
45 Health Policy Research, Australian Healthcare and Hospitals Association (AHHA); and the  
46  
47 Australian Aged Care Quality and Safety Commission, to design, develop, implement and  
48  
49 evaluate an interactive dashboard comprising integrated client information, risk indicators  
50  
51 and decision support. This dashboard is intended to be used by Anglicare staff (e.g.,  
52  
53 registered nurses, care workers, care advisors, managers), clients, informal caregivers, and  
54  
55 general practitioners (GPs) providing services to Anglicare clients, collectively referred to as  
56  
57  
58  
59  
60



1  
2  
3 ‘users’. It is expected that the dashboard will be used to identify and support older adults at  
4 risk of poor outcomes in residential aged care facilities and community-based aged care. The  
5 dashboard will be iteratively co-designed and evaluated with stakeholders to (i) allow care  
6 managers to monitor robust real-time indicators of care quality, (ii) support staff members  
7 and GPs to obtain a client overview ‘at-a-glance’ and make evidence-based decisions about  
8 their care, and (iii) provide timely, meaningful information to older persons and their  
9 families.

### 18 19 *Priority aged care challenges*

20 Risk indicators will initially target two priority aged care challenges relevant to both  
21 residential- and community-based care populations: (i) hospital-related falls; and (ii) Quality  
22 of Life (QoL).

- 23  
24  
25  
26  
27  
28  
29  
30  
31  
32  
33  
34  
35  
36  
37  
38  
39  
40  
41  
42  
43  
44  
45  
46  
47  
48  
49  
50  
51  
52  
53  
54  
55  
56  
57  
58  
59  
60
- (i) Falls are a major cause of harm to older Australians, experienced by more than a third of adults aged  $\geq 65$  every year.<sup>38</sup> In 2014-15 in Australia, over 1.4 million hospital days were attributable to fall-related injuries among older adults,<sup>39</sup> costing >\$500 million AUD.<sup>40</sup> Falls are the cause of 92% of injury hospitalisations among aged care residents.<sup>41</sup> Identifying those at risk is the starting point to improve falls management. However, falls risk tools currently in use are stand-alone assessments that are rarely integrated with dynamic information about an individual’s risk, such as changes in medications or health following a hospitalisation.<sup>42</sup>
  - (ii) QoL has been recognised by international peak health and healthcare organisations as an important aspect of active ageing and quality care in long-term care settings.<sup>6 43 44</sup> Older Australians report QoL as a central goal for aged care.<sup>45</sup> While research on the relationships between QoL and clinical outcomes in aged care settings is sparse, some evidence suggests that lower QoL scores are

1  
2  
3 associated with poorer clinical outcomes in residential aged care clients.<sup>46-48</sup>  
4  
5 Alongside the increased recognition of the importance of QoL for older adults,  
6  
7 valid and reliable QoL tools have recently been developed, including those  
8  
9 suitable for use by people with dementia.<sup>46 49-54</sup> Currently, reporting on QoL in  
10  
11 Australian aged care is not mandatory, and while recent national policy requires  
12  
13 community care providers to report on client wellness,<sup>55</sup> relatively little is known  
14  
15 about modifiable factors contributing to QoL in aged care.  
16  
17

18  
19 These two exemplar indicators will serve as an initial model to test embedding risk  
20  
21 indicators in an electronic dashboard within aged care settings. Other indicators may be  
22  
23 added during the study in response to feedback from users.  
24  
25

### 26 27 28 29 **Study aim**

30  
31 The aim of this study is to describe the co-design and testing of a dashboard in residential and  
32  
33 community-based aged care settings, and to outline longer-term plans for dashboard  
34  
35 implementation and evaluation.  
36  
37

## 38 39 40 41 **METHODS AND ANALYSIS**

### 42 43 44 **Study design**

45  
46 The research comprises three components: 1. (a) Co-design of the digital dashboard with  
47  
48 users and (b) Refinement of prototypes; 2. Integration of data sources and development of  
49  
50 risk models; and 3. Dashboard prototype testing with users. Figure 2 provides an overview of  
51  
52 the study design. The study gained ethics approval in December 2019, with data collection  
53  
54 commencing April 2020.  
55  
56  
57  
58  
59  
60

1  
2  
3 <Insert figure 2 here>  
4  
5  
6  
7

### 8 *Co-design principles*

9

10  
11 Co-design is a methodology used to design and deliver interventions which take account of  
12 contextual factors, facilitate ownership of interventions, and motivate uptake and user  
13 satisfaction.<sup>32 37</sup> It is an approach that seeks out the meaningful involvement of potential user  
14 groups in designing tools and interventions, drawing on their lived experiences to ensure that  
15 outputs are tailored to their expressed needs and preferences, and align with workflows and  
16 available resources. Our research processes and methodology choices are guided by the  
17 following co-design principles outlined by Blomkamp,<sup>56</sup> adapted from New South Wales  
18 Council of Social Services<sup>57</sup>: Outcomes-focused, inclusive, participative, respectful, and  
19 adaptive. The overarching goal of our research is to achieve positive change in aged care by  
20 improving outcomes for older adults. We plan to involve a range of stakeholders in the design  
21 process and will be seeking out their unique knowledge, opinions, and experiences. We  
22 acknowledge that each user group has equal standing and are experts in their own right. Our  
23 study will involve users at different stages throughout the co-design process to ensure that the  
24 dashboard is appropriate, useful, and relevant. Stakeholders' input will be sought throughout  
25 an iterative process to help refine the dashboard.  
26  
27  
28  
29  
30  
31  
32  
33  
34  
35  
36  
37  
38  
39  
40  
41  
42  
43  
44  
45  
46  
47

### 48 **Study population**

49

50  
51 Anglicare provides a variety of support services across the life span, including aged care,  
52 mental health services, palliative care, and family support. This study involves Anglicare's 23  
53 residential aged care facilities, and their community-based aged care service outlets which  
54 provide services to older people in their homes. The risk modelling and data integration  
55  
56  
57  
58  
59  
60

1  
2  
3 component of this study will include data about all of Anglicare's residential and community  
4 care clients over the previous five years (1 July 2014 - 31 December 2019, n=~14,800). The  
5  
6 co-design and prototype testing components will involve samples drawn from Anglicare staff  
7  
8 members (registered nurses, care workers, care managers), clients, informal caregivers and  
9  
10 GPs. These groups represent the anticipated users of the dashboard, and are the people most  
11  
12 likely to access client information and make decisions about care. Anglicare staff members  
13  
14 will be recruited during management meetings and via emails from executive Anglicare staff,  
15  
16 where information about the study and participation requirements will be presented. Contact  
17  
18 details of interested staff members will be provided to researchers for recruitment. Clients  
19  
20 and informal caregivers who meet the following inclusion criteria will be invited to  
21  
22 participate in the study: currently receiving Anglicare residential or community care services;  
23  
24 ability to participate in an English-language interview; and ability to provide informed  
25  
26 consent. Clients will be provided with information and consent sheets by members of  
27  
28 Anglicare staff. Those who are interested in participating in the study will be asked if they  
29  
30 consent to their contact details being shared with the research team, who will then contact  
31  
32 them to provide more information about the study, answer any questions and schedule an  
33  
34 interview time if appropriate. General practitioners will be recruited via the Sydney North  
35  
36 PHN networks through email or flyers. All participants will be required to provide written or  
37  
38 verbal consent before engaging in the study.  
39  
40  
41  
42  
43  
44  
45  
46  
47  
48  
49

## 50 **Methods and analysis**

### 51 *Component 1a: Co-design of the digital dashboard with users*

52  
53 The design of the dashboard will draw on existing literature in human factors design and  
54  
55 evaluation, evidence of features of effective dashboards, and input from users, guided by co-  
56  
57 design principles. A multi-method approach will be taken to investigate users' needs and  
58  
59  
60

1  
2  
3 preferences, design the dashboard and to examine how the dashboard could be integrated into  
4  
5 everyday practices. This will include:  
6  
7

- 8 • Direct observations of staff members' routine work interactions including type, location  
9 and duration of activities. Non-participant observations will be conducted  
10 unobtrusively (e.g., at a distance of approximately 3 metres) using a validated time and  
11 motion tool (e.g., Work Observation Method By Activity Timing.<sup>58 59</sup>  
12  
13  
14  
15  
16  
17 • Interviews and focus groups with staff members about the design of the dashboard.  
18 Staff members will be asked about their perspectives on core information to be included  
19 in the dashboard and dashboard features (e.g., presentation of information and inclusion  
20 of decision support tools). They will also be asked about how decision-making guidance  
21 for the target priority areas (hospital-related falls and QoL) could be of value, and work  
22 processes or challenges garnered from the direct observations.  
23  
24  
25  
26  
27  
28  
29  
30  
31 • Interviews and focus groups with aged care clients and informal caregivers to explore  
32 their preferences and experiences relating to access to medical and aged care  
33 information, involvement in decision-making, and use of technology. The interviews  
34 will also focus on design features of the dashboard including functions (what clients  
35 would like the dashboard to do, and how), appearance (e.g., colours, fonts, layout), and  
36 information to be included in the dashboard.  
37  
38  
39  
40  
41  
42  
43  
44  
45 • Interviews with GPs focusing on how the dashboard could support improved  
46 communication between aged care and primary care. This will include, for example,  
47 discussion of current processes and difficulties experienced in the transfer of  
48 information between aged care facilities and GP practice records. Exploration of GP  
49 use of decision support tools will also occur.  
50  
51  
52  
53  
54  
55  
56  
57 • Co-design groups with users (staff members, GPs, clients and informal caregivers) to  
58 design and develop decision support for the risk indicators. The decision support will  
59  
60

1  
2  
3 comprise evidence-based information on actions to be taken when clients are identified as  
4  
5 at risk.  
6  
7

### 8 *Analysis*

9  
10 Interviews, focus groups and co-design groups will be audio recorded and transcribed verbatim.  
11  
12 Qualitative data will be analysed using a structured content analysis approach.<sup>60 61</sup> This  
13  
14 approach allows for major domains and themes from users' responses to be categorised in order  
15  
16 to understand users' needs and preferences related to dashboard appearance and functionality.  
17  
18 Data analysis will be conducted in NVivo version 12, a program that will support the  
19  
20 categorisation of qualitative data into domains and themes.<sup>62</sup> Two researchers will perform the  
21  
22 initial coding of these data, producing a list of codes which will then be reviewed by the  
23  
24 research team. Any discrepancies in coding will be discussed and used to modify the list of  
25  
26 codes until the research team agrees on code application. The codes will then be sorted into  
27  
28 preliminary domains and themes, which will be repeatedly reviewed and refined to maximise  
29  
30 homogeneity prior to developing an analytic narrative. Data from the observation sessions will  
31  
32 be descriptively analysed for time spent on different activities, interactions with people, tools  
33  
34 and other methods used to complete tasks, as well as the rate of interruptions.  
35  
36  
37  
38  
39

### 40 ***Component 1b: Refinement of prototypes***

41  
42  
43 The findings from the co-design activities will be used to create mock-ups of the dashboard  
44  
45 prototypes that will be presented to staff members, clients and informal caregivers during focus  
46  
47 groups and a community forum, as well as GPs during a workshop. As the dashboard is  
48  
49 intended for different users, the presentation of information, dashboard features and evidence-  
50  
51 based decision support will be tailored towards each user group and therefore, mock-ups will  
52  
53 be user-specific. Users' feedback will provide insights into their perspectives of the prototype  
54  
55 design, functionality and modifications needed, and guide revisions to the dashboard prototype.  
56  
57  
58  
59 The qualitative data obtained through prototype feedback sessions will be analysed using the  
60

1  
2  
3 same strategies outlined above.  
4  
5  
6  
7

### 8 ***Component 2: Integration of data sources and development of risk models***

10 Building upon the feedback from users in component 1a, we will develop a list of information  
11 items that will be used to populate the dashboard, based on the data available from Anglicare  
12 sources (Table 1). Two exemplar risk models, one for each priority area, will be developed  
13 through the linkage of available historical Anglicare client records with data from the NSW  
14 Emergency Department Data Collection (EDDC), the NSW Admitted Patient Data Collection  
15 (APDC) and the NSW Registry of Births, Deaths and Marriages (RBDM) registries (see Table  
16 1 for descriptions of data sources). Data will be extracted for all Anglicare's residential and  
17 community care clients over the previous 5 years. Hospital data for these clients will be  
18 requested from the data custodians of the NSW EDDC, the NSW APDC and the NSW RBDM  
19 death registrations. The Centre for Health Record Linkage (CHeReL) will conduct the data  
20 linkage in order to allow preservation of individual confidentiality as data custodians supply  
21 only personal identifiers to CHeReL without clinical data. Only clinical data without personal  
22 identifiers will be supplied to researchers.  
23  
24  
25  
26  
27  
28  
29  
30  
31  
32  
33  
34  
35  
36  
37  
38  
39

40  
41 Candidate variables to be evaluated as predictors will be based on existing literature  
42 and the extracted data from Anglicare client records (see Table 1). The variables will be used  
43 in the development of the two independent risk models, one for falls and one for quality of life.  
44 Multivariable discrete time survival (DTS) modelling will be used to develop each model.<sup>63 64</sup>  
45 A rounded score for each risk factor in the final models will be calculated by dividing the  
46 regression coefficient of each covariate by the lowest coefficient in the model. This allows for  
47 total risk scores to be calculated for each person by summing the scores for each present risk  
48 factor. Risk models will be internally validated using bootstrap resampling. We have presented  
49 the approach to DTS modelling, however other modelling will be explored, for example joint  
50  
51  
52  
53  
54  
55  
56  
57  
58  
59  
60

1  
2  
3 regression<sup>65</sup> and landmark models.<sup>66</sup> To inform decision-making about the most appropriate  
4  
5 model to use, statistical model performance techniques, such as the concordance index, will be  
6  
7 performed. STATA will be used to conduct the statistical analysis.  
8  
9  
10  
11  
12

13 **Table 1: Data sources for project component 2: Risk models**  
14

| Data source              | Description                                                                                                                                                                                                                                                                                                           |
|--------------------------|-----------------------------------------------------------------------------------------------------------------------------------------------------------------------------------------------------------------------------------------------------------------------------------------------------------------------|
| Aged care client records | This electronic health and care management information system includes client demographic information, clinical data, client needs data, service and activity data, medications administered, social factors, and QoL measures.                                                                                       |
| EDDC                     | This collection provides information about patient presentations to the emergency departments of public hospitals in NSW, such as admission and separation dates, mode of separation, referral source, triage category and diagnoses.                                                                                 |
| APDC                     | This collection records all admitted patient services provided by NSW public hospitals, public psychiatric hospitals, public multi-purpose services, private hospitals, and private day procedures centres. Data includes admission and separation dates, demographics, mode of separation, diagnosis and procedures. |
| RBDM registries          | This dataset contains date and cause of death information for deaths occurring in NSW.                                                                                                                                                                                                                                |

15  
16  
17  
18  
19  
20  
21  
22  
23  
24  
25  
26  
27  
28  
29  
30  
31  
32  
33  
34  
35  
36  
37  
38  
39  
40  
41  
42  
43  
44  
45  
46  
47  
48  
49  
50  
51  
52  
53  
54 NSW=New South Wales; EDDC= NSW Emergency Department Data Collection; APDC= Admitted Patient  
55 Data Collection; RBDM=Registry of Births, Deaths and Marriages registries  
56  
57  
58  
59  
60



### ***Component 3: Dashboard prototype testing***

Informed by the findings from component 1, and the outputs of component 2, user-specific prototypes of the dashboard will be created by a specialist IT programmer and Anglicare IT staff using and adapting modifiable modules within Anglicare's existing infrastructure. Client health and care information, along with the risk models, will be integrated into the dashboard to a) provide an overview of clients' information (e.g., current medications) and b) alert users to changes in clients' risk levels for the two priority risk indicators in real-time. Each indicator will be accompanied by evidence-based decision guidance to direct actions in response the level of risk identified.

To test the dashboard prototype, staff members will be guided through task-based scenario 'walk-throughs' with a think-aloud approach.<sup>67</sup> Subsequent follow-up interviews or focus groups will be conducted to explore staff members' perceptions of the dashboard and alignment with workflow. Clients and informal caregivers will also engage in scenario walk-throughs, along with follow-up interviews or focus groups to elicit their views on their use of the dashboard. Qualitative data from the think-aloud activity and interviews will be analysed using the same methods as Component 2. The prototype testing phase will inform refinements of the dashboard, driven by users' feedback.

### **Longer-term plans for dashboard implementation and evaluation**

While the wide-spread implementation and evaluation of the dashboard are not the focus of this protocol, a broad overview of an anticipated large-scale trial to investigate the scalability and effectiveness is outlined. Once the dashboard has been revised in line with the findings from prototype testing, a hybrid stepped-wedge cluster randomised controlled trial will be carried out. This will involve implementing the dashboard in 12 Anglicare residential facilities and 12 community care units, with two residential aged care facilities and two community care

1  
2  
3 units randomly selected for dashboard implementation each month for six months. The  
4 remaining facilities and community units will continue with usual care until the end of the trial.  
5  
6 Implementation processes will utilise Anglicare's staff training mechanisms and provide  
7  
8 workshops for staff and clients/informal caregivers on dashboard purpose and use, using  
9  
10 practical examples and incorporating behaviour change principles to support both intervention  
11  
12 fidelity and effectiveness. As part of the randomised controlled trial, process evaluations will  
13  
14 be conducted to identify barriers and facilitators to dashboard use, and economic evaluations  
15  
16 to assess resource use and costs associated with the development and implementation of the  
17  
18 dashboard will be undertaken.  
19  
20  
21  
22

23  
24 It is anticipated that the dashboard will serve as a model for both Australian and  
25  
26 international aged care organisations wanting to integrate siloed data and use informatics to  
27  
28 facilitate real-time quality monitoring and management of client outcomes. Lessons learned  
29  
30 from this project may be applied more broadly to the co-design of interventions with users, as  
31  
32 well as the utilisation of data and IT systems in aged care settings.  
33  
34  
35  
36  
37  
38

### 39 **Patient and public involvement**

40  
41 This research centres on the philosophy that users are *co-creators* of the research rather than  
42  
43 *participants* in the research.<sup>68 69</sup> The project proposal was co-designed from inception with key  
44  
45 Anglicare staff in a series of workshops starting in December 2017. In order to ensure that the  
46  
47 research will have meaningful and real-world applications, users (staff, aged care clients,  
48  
49 informal caregivers, and GPs) will continue to have strong engagement across the various  
50  
51 stages of the research.<sup>68</sup> We aim to elicit users' expert knowledge, preferences and experiences  
52  
53 through a range of methods, namely, interviews, observations, focus groups, co-design groups,  
54  
55 workshops and forums. This information will be used to guide development of the dashboard,  
56  
57 facilitate its implementation, and inform future evaluations of the intervention. Relevant  
58  
59  
60

1  
2  
3 stakeholders including Anglicare representatives and users will be included in publications  
4  
5 arising from this research to ensure appropriate interpretation of findings.<sup>68</sup>  
6  
7  
8  
9

## 10 **ETHICS AND DISSEMINATION**

11  
12 This study has received ethical approval from the NSW Population & Health Services  
13  
14 Research Ethics Committee (Ref: 2020/ETH00166) and the Macquarie University Human  
15  
16 Research Ethics Committee (Ref: 6144). Data will be managed and stored in line with  
17  
18 Macquarie University policies. The findings of this research project will be disseminated as  
19  
20 peer-reviewed journal articles and as presentations at national and international conferences,  
21  
22 seminars and workshops. The Deeble Institute for Health Policy Research, AHHA, will play  
23  
24 a valuable role to support policy translation using their extensive advocacy networks across  
25  
26 health policy portfolios. Research findings will be disseminated through policy briefs and  
27  
28 regular meetings with parliamentary staff and policy-makers. Findings will be relayed back to  
29  
30 Anglicare to inform decisions, and their networks will be used to present findings to clients  
31  
32 and their informal caregivers.  
33  
34  
35  
36  
37  
38  
39  
40  
41  
42  
43  
44

## 45 **LIST OF ABBREVIATIONS**

46 **AUD** Australian dollars

47  
48 **APDC** Admitted Patient Data Collection

49  
50 **CHeReL** Centre for Health Record Linkage

51  
52 **EDDC** Emergency Department Data Collection

53  
54 **GP** General Practitioners

55  
56 **ICT** Information and communication technologies  
57  
58  
59  
60

1  
2  
3 **NSLHD** Northern Sydney Local Health District  
4

5 **NHMRC** National Health and Medical Research Council  
6  
7

8 **NSW** New South Wales  
9

10 **QoL** Quality of Life  
11  
12

13 **RBDM** Registry of Births, Deaths and Marriages  
14  
15

16 **SNPHN** Sydney North Primary Health Network  
17  
18

19 **SW-CRCT** Stepped-wedge cluster randomised controlled trial  
20  
21  
22

## 23 24 **DECLARATIONS**

### 25 26 **Competing interests**

27  
28 The authors declare that they have no competing interests.  
29  
30

### 31 32 **Funding**

33  
34 This project was funded by an Australian National Health and Medical Research Council  
35 (NHMRC) Partnership Project Grant in partnership with Anglicare (1170898). The NHMRC  
36 did not have any influence on the design of the study and collection, analysis, and  
37 interpretation of data. MR is supported by an NHMRC Early Career Fellowship (1143941).  
38  
39 JW is supported by a NHMRC Elizabeth Blackburn Leadership Investigator Grant  
40 (1174021). JB is supported by an NHMRC Leadership Investigator Grant (1176620), the  
41 NHMRC Partnership Centre in Health System Sustainability (Grant ID 9100002) and  
42  
43 APP1135058.  
44  
45  
46  
47  
48  
49  
50  
51  
52

### 53 54 **Authors' contributions**

55  
56 This protocol was based on a successful funding application prepared by the chief  
57 investigators JW, MB, LCG, RD, JR, SRL, AG and JB with input from the associate  
58  
59  
60

1  
2  
3 investigators (MZR, JC, EB, WYZ, DD, JR, DR), staff from the aged care partner  
4  
5 organisation (MC, AT, JS, JW), research partners (LO, CS, RH) and members of the project  
6  
7 team working on the research (KL, MJ, KEL, ADN, JS, KS, MM). KL drafted the protocol  
8  
9 and all authors contributed to reviewing and approving the final version.  
10  
11

## 12 **Acknowledgements**

13  
14  
15 The authors wish to acknowledge our partners and collaborators; Anglicare, Sydney North  
16  
17 Primary Health Network, Northern Sydney Local Health District, the Deeble Institute for  
18  
19 Health Policy Research from the Australian Healthcare and Hospitals Association, and the  
20  
21 Aged Care Quality and Safety Commission.  
22  
23  
24  
25  
26

## 27 **REFERENCES**

- 28  
29  
30 1. Royal Commission into Aged Care Quality and Safety. Interim Report: Neglect. Adelaide,  
31  
32 Australia: Commonwealth of Australia, 2019.  
33  
34 2. Age UK. Briefing: Health and Care of Older People in England 2019. London, UK: Age  
35  
36 UK, 2019.  
37  
38 3. European Social Policy Network (ESPN). Challenges in Long-term Care in Europe: A  
39  
40 Study of National Policies. Brussels, BE: European Commission, 2018.  
41  
42 4. Organisation for Economic Co-operation and Development. Ageing and long-term care.  
43  
44 Health at a Glance 2019: OECD Indicators. Paris, France: OECD 2019:217-39.  
45  
46 5. Ludlow K, Churruca K, Mumford V, et al. Unfinished care in residential aged care  
47  
48 facilities: an integrative review. *The Gerontologist* 2019:gznz145. doi:  
49  
50 10.1093/geront/gnz145  
51  
52 6. World Health Organization. World Report on Ageing and Health. Geneva, Switzerland:  
53  
54 WHO, 2015.  
55  
56  
57  
58  
59  
60

- 1  
2  
3 7. Royal Commission into Aged Care Quality and Safety. A History of Aged Care Reviews.  
4  
5 Adelaide, Australia: Commonwealth of Australia, 2020.  
6
- 7  
8 8. Royal Commission into Aged Care Quality and Safety. Home page. 2020. Available from:  
9  
10 <https://agedcare.royalcommission.gov.au/Pages/default.aspx>.  
11
- 12  
13 9. Royal Commission into Aged Care Quality and Safety. Australia's Aged Care System:  
14  
15 Assessing the Views And Preferences of the General Public for Quality of Care and  
16  
17 Future Funding. Adelaide, Australia: Commonwealth of Australia, 2020.  
18
- 19  
20 10. Royal Commission into Aged Care Quality and Safety. Final report. Adelaide, Australia:  
21  
22 Commonwealth of Australia; 2021. Available from:  
23  
24 <https://agedcare.royalcommission.gov.au/publications/final-report>.  
25
- 26  
27 11. An international comparison of technology utilization in an aged care setting. Information  
28  
29 Technology in Aged Care; 2017 20-22 November; Gold Coast, Australia.  
30
- 31  
32 12. Forte P. Data rich, information poor: Data, information and decision support in the NHS.  
33  
34 *European Journal of Information Systems* 1994;3(2):148-54. doi:  
35  
36 10.1057/ejis.1994.15  
37
- 38  
39 13. Data Rich – But Information Poor. 18th Working Conference on Virtual Enterprises  
40  
41 (PROVE); 2017 18-20 September; Vicenza, Italy. Springer International Publishing.  
42
- 43  
44 14. Royal Commission into Aged Care Quality and Safety. International and National Quality  
45  
46 and Safety Indicators for Aged Care. Adelaide, Australia: Commonwealth of  
47  
48 Australia, 2020.
- 49  
50 15. Royal Commission into Aged Care Quality and Safety. Australia far behind in monitoring  
51  
52 aged care quality. Adelaide, Australia: Royal Commission into Aged Care Quality  
53  
54 and Safety; 2020. Available from: [https://agedcare.royalcommission.gov.au/news-  
55  
56 and-media/australia-far-behind-monitoring-aged-care-quality](https://agedcare.royalcommission.gov.au/news-and-media/australia-far-behind-monitoring-aged-care-quality).  
57  
58  
59  
60

- 1  
2  
3 16. Australian Government. Department of Health. National Aged Care Mandatory Quality  
4 Indicator Program. Canberra, Australia: Commonwealth of Australia; 2020. Available  
5 from: [https://www.health.gov.au/initiatives-and-programs/national-aged-care-](https://www.health.gov.au/initiatives-and-programs/national-aged-care-mandatory-quality-indicator-program)  
6 [mandatory-quality-indicator-program](https://www.health.gov.au/initiatives-and-programs/national-aged-care-mandatory-quality-indicator-program).  
7  
8  
9  
10  
11  
12 17. van Weel JM, Renehan E, Ervin KE, et al. Home care service utilisation by people with  
13 dementia-A retrospective cohort study of community nursing data in Australia. *Health*  
14 *& Social Care in the Community* 2019;27(3):665-75. doi: 10.1111/hsc.12683  
15  
16 [published Online First: 2018/11/14]  
17  
18  
19  
20  
21 18. Lind KE, Raban MZ, Brett L, et al. Measuring the prevalence of 60 health conditions in  
22 older Australians in residential aged care with electronic health records: A  
23 retrospective dynamic cohort study. *Population Health Metrics* 2020;18(1):25. doi:  
24 10.1186/s12963-020-00234-z  
25  
26  
27  
28  
29  
30 19. Lind KE, Raban MZ, Georgiou A, et al. NSAID use among residents in 68 residential  
31 aged care facilities 2014 to 2017: An analysis of duration, concomitant medication  
32 use, and high-risk conditions. *Pharmacoepidemiology and Drug Safety*  
33 2019;28(11):1480-88. doi: 10.1002/pds.4866 [published Online First: 2019/08/08]  
34  
35  
36  
37  
38  
39 20. Raban MZ, Lind KE, Day RO, et al. Trends, determinants and differences in antibiotic  
40 use in 68 residential aged care homes in Australia, 2014-2017: A longitudinal analysis  
41 of electronic health record data. *BMC Health Services Research* 2020;20(1):883. doi:  
42 10.1186/s12913-020-05723-3 [published Online First: 2020/09/20]  
43  
44  
45  
46  
47  
48 21. Lind KE, Raban MZ, Georgiou A, et al. Duration of antipsychotic medication use by aged  
49 care facility residents with dementia. *Alzheimer Disease & Associated Disorders*  
50 2019;33(4):331-38. doi: 10.1097/wad.0000000000000336 [published Online First:  
51 2019/07/26]  
52  
53  
54  
55  
56  
57  
58  
59  
60

- 1  
2  
3 22. Pont LG, Raban MZ, Jorgensen ML, et al. Leveraging new information technology to  
4 monitor medicine use in 71 residential aged care facilities: Variation in polypharmacy  
5 and antipsychotic use. *International Journal for Quality in Health Care*  
6  
7  
8 2018;30(10):810-16. doi: 10.1093/intqhc/mzy098  
9  
10  
11  
12 23. Jorgensen M, Siette J, Georgiou A, et al. Longitudinal variation in pressure injury  
13 incidence among long-term aged care facilities. *International Journal for Quality in*  
14  
15  
16  
17  
18  
19 24. Parikh RB, Kakad M, Bates DW. Integrating predictive analytics into high-value care:  
20 The dawn of precision delivery. *Journal of the American Medical Association*  
21  
22  
23  
24  
25 2016;315(7):651-52. doi: 10.1001/jama.2015.19417  
26  
27 25. Mahmoudi E, Kamdar N, Kim N, et al. Use of electronic medical records in development  
28 and validation of risk prediction models of hospital readmission: Systematic review.  
29  
30  
31  
32  
33 26. Goldstein BA, Navar AM, Pencina MJ, et al. Opportunities and challenges in developing  
34 risk prediction models with electronic health records data: A systematic review.  
35  
36  
37  
38  
39  
40  
41  
42  
43 27. Classen D, Li M, Miller S, et al. An electronic health record-based real-time analytics  
44 program for patient safety surveillance and improvement. *Health Affairs*  
45  
46  
47  
48 2018;37(11):1805-12. doi: 10.1377/hlthaff.2018.0728  
49  
50 28. Dey M, Rautaray SS. Study and analysis of data mining algorithms for healthcare  
51 decision support system. *International Journal of Computer Science and Information*  
52  
53  
54  
55  
56  
57  
58  
59  
60



- 1  
2  
3 29. Wang Y, Kung L, Byrd TA. Big data analytics: Understanding its capabilities and  
4 potential benefits for healthcare organizations. *Technological Forecasting and Social*  
5 *Change* 2018;126:3-13. doi: 10.1016/j.techfore.2015.12.019  
6  
7  
8  
9  
10 30. Kwan JL, Lo L, Ferguson J, et al. Computerised clinical decision support systems and  
11 absolute improvements in care: Meta-analysis of controlled clinical trials. *BMJ*  
12 *2020*;370:m3216. doi: 10.1136/bmj.m3216  
13  
14  
15  
16  
17 31. Gilbert T, Neuburger J, Kraindler J, et al. Development and validation of a Hospital  
18 Frailty Risk Score focusing on older people in acute care settings using electronic  
19 hospital records: an observational study. *The Lancet* 2018;391(10132):1775-82. doi:  
20 10.1016/S0140-6736(18)30668-8  
21  
22  
23  
24  
25  
26 32. Dowding D, Randell R, Gardner P, et al. Dashboards for improving patient care: Review  
27 of the literature. *International Journal of Medical Informatics* 2015;84(2):87-100. doi:  
28 10.1016/j.ijmedinf.2014.10.001  
29  
30  
31  
32  
33 33. Khairat SS, Dukkipati A, Lauria HA, et al. The impact of visualization dashboards on  
34 quality of care and clinician satisfaction: Integrative literature review. *JMIR Human*  
35 *Factors* 2018;5(2):e22. doi: 10.2196/humanfactors.9328 [published Online First:  
36 2018/06/02]  
37  
38  
39  
40  
41  
42 34. Buttigieg SC, Pace A, Rathert C. Hospital performance dashboards: A literature review.  
43 *Journal of Health Organization and Management* 2017;31(3):385-406. doi:  
44 10.1108/jhom-04-2017-0088 [published Online First: 2017/07/08]  
45  
46  
47  
48  
49 35. Franklin A, Gantela S, Shifarrow S, et al. Dashboard visualizations: Supporting real-time  
50 throughput decision-making. *Journal of Biomedical Informatics* 2017;71:211-21. doi:  
51 10.1016/j.jbi.2017.05.024  
52  
53  
54  
55  
56  
57  
58  
59  
60

- 1  
2  
3 36. Kapadia V, Ariani A, Li J, et al. Emerging ICT implementation issues in aged care.  
4  
5 *International Journal of Medical Informatics* 2015;84(11):892-900. doi:  
6  
7 10.1016/j.ijmedinf.2015.07.002  
8  
9
- 10 37. Vogelsmeier AA, Halbesleben JR, Scott-Cawiezell JR. Technology implementation and  
11  
12 workarounds in the nursing home. *Journal of the American Medical Informatics*  
13  
14 *Association* 2008;15(1):114-19. doi: 10.1197/jamia.M2378  
15  
16
- 17 38. World Health Organization. WHO global report on falls prevention in older age. Paris,  
18  
19 France: WHO, 2007.  
20
- 21 39. Australian Institute of Health and Welfare. Trends in Hospitalised Injury Due to Falls in  
22  
23 Older People, 2002–03 to 2014–15. Canberra, Australia: AIHW, 2018.  
24  
25
- 26 40. Watson WL, Clapperton AJ, Mitchell RJ. The cost of fall-related injuries among older  
27  
28 people in NSW, 2006–07. *New South Wales Public Health Bulletin* 2011;22(4):55-59.  
29  
30 doi: 10.1071/NB10002  
31  
32
- 33 41. Mitchell R, Harvey L, Draper B, et al. Risk factors associated with residential aged care,  
34  
35 respite and transitional aged care admission for older people following an injury-  
36  
37 related hospitalisation. *Archives of Gerontology and Geriatrics* 2017;72:59-66. doi:  
38  
39 10.1016/j.archger.2017.05.012  
40  
41
- 42 42. Lucero RJ, Lindberg DS, Fehlberg EA, et al. A data-driven and practice-based approach  
43  
44 to identify risk factors associated with hospital-acquired falls: Applying manual and  
45  
46 semi- and fully-automated methods. *International Journal of Medical Informatics*  
47  
48 2019;122:63-69. doi: 10.1016/j.ijmedinf.2018.11.006 [published Online First:  
49  
50 2019/01/10]  
51  
52
- 53 43. Organisation for Economic Co-operation and Development, European Union. A Good  
54  
55 Life in Old Age? Monitoring and Improving Quality in Long-Term Care. Paris,  
56  
57 France: OECD Publishing, 2013.  
58  
59  
60

- 1  
2  
3 44. Tesch-Roemer C. Active Ageing and Quality of Life in old Age. Geneva, Switzerland:  
4  
5 UNECE, 2010.  
6  
7  
8 45. COTA Australia. Measuring Quality and Consumer Choice in Aged Care. Canberra,  
9  
10 Australia: COTA Australia, 2018.  
11  
12 46. Courtney M, Edwards H, Stephan J, et al. Quality of life measures for residents of aged  
13  
14 care facilities: A literature review. *Australasian Journal on Ageing* 2003;22(2):58-64.  
15  
16 doi: 10.1111/j.1741-6612.2003.tb00467.x  
17  
18  
19 47. Courtney M, O'Reilly M, Edwards H, et al. The relationship between clinical outcomes  
20  
21 and quality of life for residents of aged care facilities. *Australian Journal of Advanced*  
22  
23 *Nursing* 2009;26(4):49-57.  
24  
25  
26 48. Beer C, Flicker L, Horner B, et al. Factors associated with self and informant ratings of  
27  
28 the quality of life of people with dementia living in care facilities: A cross sectional  
29  
30 study. *PloS one* 2010;5(12):e15621-e21. doi: 10.1371/journal.pone.0015621  
31  
32  
33 49. Bowling A, Rowe G, Adams S, et al. Quality of life in dementia: A systematically  
34  
35 conducted narrative review of dementia-specific measurement scales. *Ageing & Mental*  
36  
37 *Health* 2015;19(1):13-31. doi: 10.1080/13607863.2014.915923  
38  
39  
40 50. Missotten P, Dupuis G, Adam S. Dementia-specific quality of life instruments: A  
41  
42 conceptual analysis. *Int Psychogeriatr* 2016;28(8):1245-62. doi:  
43  
44 10.1017/s1041610216000417 [published Online First: 2016/03/24]  
45  
46  
47 51. Aspden T, Bradshaw SA, Playford ED, et al. Quality-of-life measures for use within care  
48  
49 homes: A systematic review of their measurement properties. *Age and Ageing*  
50  
51 2014;43(5):596-603. doi: 10.1093/ageing/afu089 [published Online First: 2014/08/06]  
52  
53  
54 52. Cleland J, Hutchinson C, McBain C, et al. Developing dimensions for a new preference-  
55  
56 based quality of life instrument for older people receiving aged care services in the  
57  
58  
59  
60

- community. *Quality of Life Research* 2020 doi: 10.1007/s11136-020-02649-5  
[published Online First: 2020/09/30]
53. Cleland J, Hutchinson C, Khadka J, et al. A review of the development and application of generic preference-based instruments with the older population. *Applied Health Economics and Health Policy* 2019;17(6):781-801. doi: 10.1007/s40258-019-00512-4  
[published Online First: 2019/09/13]
54. Ratcliffe J, Flint T, Easton T, et al. An empirical comparison of the EQ-5D-5L, DEMQOL-U and DEMQOL-Proxy-U in a Post-hospitalisation population of frail older people living in residential aged care. *Applied Health Economics and Health Policy* 2017;15(3):399-412. doi: 10.1007/s40258-016-0293-7
55. Australian Government. Commonwealth Home Support Programme, Program Manual 2018-2020. Canberra, Australia: Commonwealth of Australia, 2018.
56. Blomkamp E. Sharing the principles of co-design 2018. Available from: <https://medium.com/@emmablomkamp/sharing-the-principles-of-co-design-4a976bb55c48> accessed 23 May 2021.
57. New South Wales Council of Social Services. Principles of co-design 2017. Available from: <https://www.ncoss.org.au/wp-content/uploads/2017/06/Codesign-principles.pdf> accessed 23 May 2021.
58. Ballermann MA, Shaw NT, Mayes DC, et al. Validation of the Work Observation Method By Activity Timing (WOMBAT) method of conducting time-motion observations in critical care settings: An observational study. *BMC Med Inform Decis Mak* 2011;11:32. doi: 10.1186/1472-6947-11-32 [published Online First: 2011/05/19]
59. Westbrook JI, Ampt A. Design, application and testing of the Work Observation Method by Activity Timing (WOMBAT) to measure clinicians' patterns of work and

- 1  
2  
3 communication. *International Journal of Medical Informatics* 2009;78 Suppl 1:S25-  
4  
5 33. doi: 10.1016/j.ijmedinf.2008.09.003 [published Online First: 2008/10/28]  
6  
7  
8 60. Mayring P. Qualitative content analysis. In: Uwe F, von Kardoff E, Steinke I, eds. A  
9  
10 Companion to Qualitative Research. London, UK: SAGE Publications 2004:266-69.  
11  
12 61. Elo S, Kyngäs H. The qualitative content analysis process. *Journal of Advanced Nursing*  
13  
14 2008;62(1):107-15. doi: 10.1111/j.1365-2648.2007.04569.x  
15  
16  
17 62. QSR International. NVivo. Burlington, MA: QSR International; n.d. Available from:  
18  
19 <https://www.qsrinternational.com/nvivo-qualitative-data-analysis-software/home>.  
20  
21  
22 63. Tai P, Chapman J-AW, Yu E, et al. Disease-specific survival for limited-stage small-cell  
23  
24 lung cancer affected by statistical method of assessment. *BMC Cancer* 2007;7(1):31.  
25  
26 doi: 10.1186/1471-2407-7-31  
27  
28  
29 64. Prentice RL. Regression analysis of censored survival data with extensions to include  
30  
31 competing risks and case-control studies. *Environment International* 1978;1(6):321-  
32  
33 29. doi: 10.1016/0160-4120(78)90007-7  
34  
35  
36 65. Król A, Mauguén A, Mazroui Y, et al. Tutorial in joint modeling and prediction: A  
37  
38 statistical software for correlated longitudinal outcomes, recurrent events and a  
39  
40 terminal event. *2017* 2017;81(3):52. doi: 10.18637/jss.v081.i03 [published Online  
41  
42 First: 2017-10-16]  
43  
44  
45 66. Paige E, Barrett J, Stevens D, et al. Landmark models for optimizing the use of repeated  
46  
47 measurements of risk factors in electronic health records to predict future disease risk.  
48  
49 *American Journal of Epidemiology* 2018;187(7):1530-38. doi: 10.1093/aje/kwy018  
50  
51  
52 67. Jaspers MW, Steen T, Van Den Bos C, et al. The think aloud method: A guide to user  
53  
54 interface design. *International Journal of Medical Informatics* 2004;73(11-12):781-  
55  
56 95. doi: 10.1016/j.ijmedinf.2004.08.003  
57  
58  
59  
60

- 1  
2  
3 68. Brett L, Siette J, Nguyen A, et al. At the grassroots of home and community-based aged  
4 care: strategies for successful consumer engagement. *BMJ Open* 2019;9(11):e028754.  
5  
6 doi: 10.1136/bmjopen-2018-028754  
7  
8  
9  
10 69. Boylorn RM. Participants as co-researchers. In: Given LM, ed. *The SAGE Encyclopedia*  
11 *of Qualitative Research Methods*. Thousand Oaks, CA: SAGE Publications 2008:599-  
12  
13  
14  
15 601.  
16  
17  
18  
19  
20  
21

## 22 **FIGURE LEGEND**

23  
24  
25 **Figure 1: Example of a dashboard to predict risk and deliver actionable information**

26  
27 **Figure 2: Overview of study design**

28  
29  
30 **EDDC=Emergency Department Data Collection; APDC=Admitted Patient Data Collection;**  
31 **RBDM=Registry of Births, Deaths and Marriages**  
32  
33  
34  
35  
36  
37  
38  
39  
40  
41  
42  
43  
44  
45  
46  
47  
48  
49  
50  
51  
52  
53  
54  
55  
56  
57  
58  
59  
60

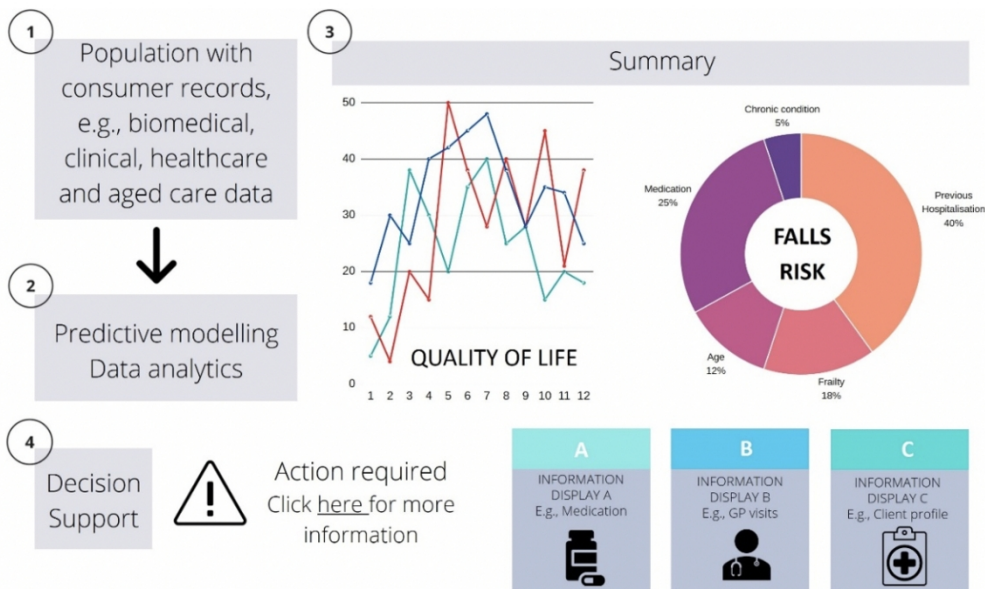

Example of a dashboard to predict risk and deliver actionable information

532x327mm (57 x 57 DPI)

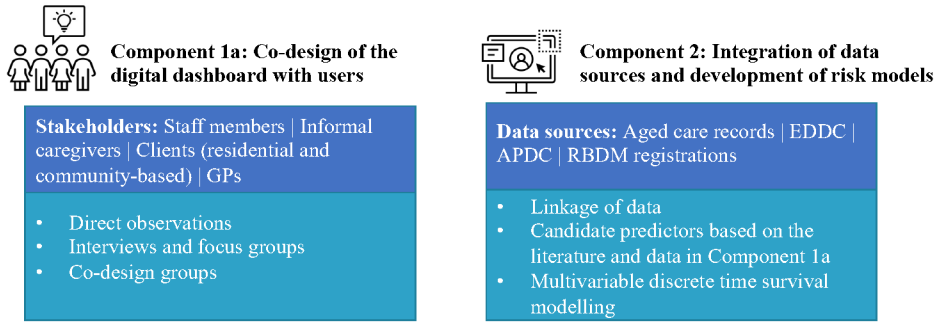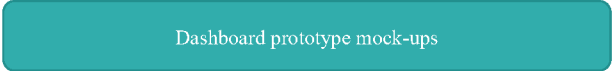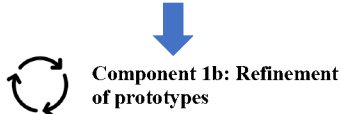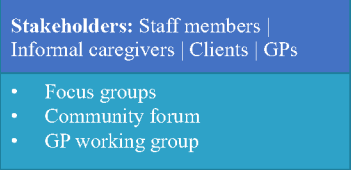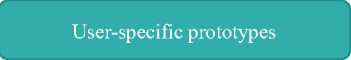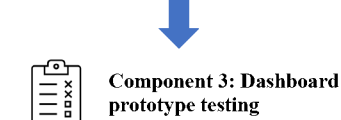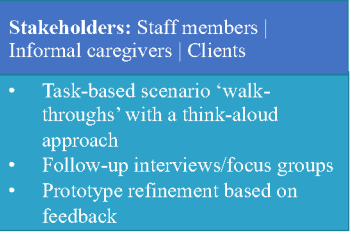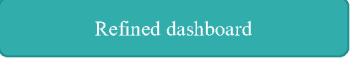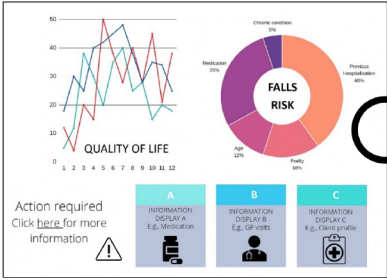

- Dashboard features:**
1. Overview of client information (e.g., medications, test results)
  2. Real-time risk indicators driven by risk models (e.g., falls, quality of life)
  3. Evidence-based decision support

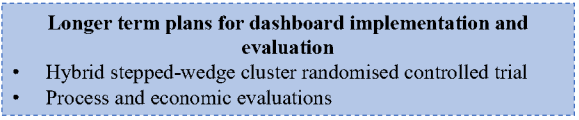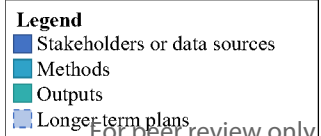

Supplement: bmjopen-2021-048657.draft_revisions.pdf [file bmjopen-2021-048657.draft_revisions.pdf]
